# Supplementary material for: Electrocatalytic dehydrogenative and defluorinative coupling between aldehyde-derived N,N-dialkylhydrazones and fluoromalonates: synthesis of 2-pyrazolines
Source: Royal Society of Chemistry journal article supplement (doi:10.1039/d4ob00588k), 2024-01-01

## Supporting Information

### Electrocatalytic dehydrogenative and defluorinative coupling between aldehyde-derived *N,N*-dialkylhydrazones and fluoromalonates: synthesis of 2-pyrazolines

Florent Noël,<sup>a</sup> Laurent El Khaïm,<sup>b</sup> Géraldine Masson,<sup>a,c</sup> Aurélie Claraz,<sup>\*a</sup>

<sup>a</sup> Institut de Chimie des Substances Naturelles, CNRS UPR 2301, Université Paris-Sud, Université Paris-Saclay, 1, av. de la Terrasse, Gif-sur-Yvette 91198 Cedex, France.

<sup>b</sup> Laboratoire de Synthèse Organique (LSO-UMR 76523), CNRS, Ecole Polytechnique, ENSTA-Paris, Institut Polytechnique de Paris, 828 Bd des Maréchaux, 91128 Palaiseau Cedex, France.

<sup>c</sup> HitCat, Seqens-CNRS joint laboratory, Seqens'lab, 8 rue de Rouen, 78440 Porcheville, France.

### Table of Contents

|                                                                            |     |
|----------------------------------------------------------------------------|-----|
| 1. General informations .....                                              | S2  |
| 1. Optimization of the reaction conditions (additional experiments) .....  | S3  |
| 2. Preparation of the aldehyde-derived <i>N,N</i> -dialkylhydrazones ..... | S4  |
| 3. Electrochemical access to 2-pyrazolines .....                           | S5  |
| 3.1. Synthetic procedure .....                                             | S5  |
| 3.2. Characterization of 2-pyrazolines <b>3</b> .....                      | S6  |
| 4. Cyclic voltammetry analysis .....                                       | S12 |
| 5. NMR spectra .....                                                       | S20 |

## 1. General informations

Unless otherwise stated, all reagents were obtained from commercial suppliers and used without further purification.

Analytical thin layer chromatography was performed on silica gel aluminum plates with F-254 indicator; spots were visualized by UV light (254 nm) and/or by staining with a  $\text{KMnO}_4$  solution. Flash column chromatographies were performed on kieselgel 35-70  $\mu\text{m}$  particle sized silica gel (200-400 mesh).

$^1\text{H}$ ,  $^{13}\text{C}$  and  $^{19}\text{F}$  NMR analyses were recorded on Bruker Avance 300, 400 or 500 spectrometers in  $\text{CDCl}_3$ ,  $\text{CD}_3\text{CN}$  or  $\text{CD}_3\text{OD}$ . The chemical shifts ( $\delta$ ) are reported in parts per million (ppm) and were referenced to the residual isotopomer solvent signals ( $\text{CHCl}_3$ :  $\delta = 7.26$  ppm;  $\text{CH}_3\text{CN}$ :  $\delta = 1.94$  ppm;  $\text{CH}_3\text{OH}$ :  $\delta = 3.31$  ppm) for  $^1\text{H}$  NMR spectra, to the solvent signal ( $\text{CDCl}_3$ :  $\delta = 77.16$  ppm;  $\text{CD}_3\text{CN}$ :  $\delta = 1.32$  ppm;  $\text{CD}_3\text{OD}$ :  $\delta = 49.00$  ppm) for  $^{13}\text{C}$  NMR spectra. Coupling constants ( $J$ ) are reported in Hertz (Hz). The following abbreviations are used: s, singlet; d, doublet; t, triplet; q, quartet; m, multiplet; br, broad.

HRMS were determined on a Waters XevoQTof spectrometer using an electrospray ionization coupled with a time of flight analyzer (ESI-TOF) after dissolving the analyte in  $\text{CH}_3\text{CN}$ .

Infrared spectra were recorded on an IR spectrometer (Perkin Elmer BX FT-IR), and absorption frequencies were reported in reciprocal centimeters ( $\text{cm}^{-1}$ ).

Electrochemical synthetic reactions were carried out with an IKA ElectraSyn 2.0 Pro apparatus using IKA electrodes.

## 2. Optimization of the reaction conditions (additional experiments)

**Table S1:** Evaluation of various solvent systems

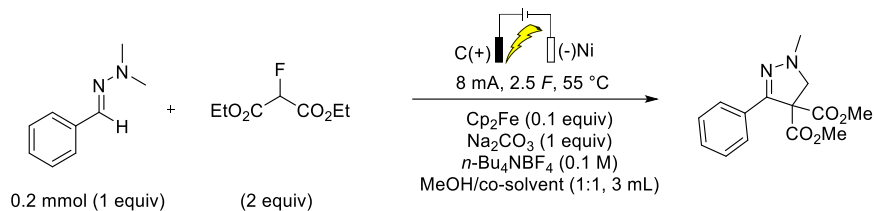

| Entry          | Co-solvent         | Yield (%) <sup>a</sup> |
|----------------|--------------------|------------------------|
| 1              | THF                | 44                     |
| 2 <sup>b</sup> | THF                | 13                     |
| 3              | -                  | 54                     |
| 4              | CH <sub>3</sub> CN | 45                     |
| 5 <sup>c</sup> | CH <sub>3</sub> CN | 5                      |
| 6              | DCE                | 50                     |
| 7              | Acetone            | 43                     |
| 8              | HFIP               | 0                      |
| 9              | DMF                | 44                     |
| 10             | DMSO               | 42                     |

<sup>a</sup> NMR yield using 1,3,5-trimethoxybenzene as an internal standard. <sup>b</sup> rt instead of 55 °C. <sup>c</sup> Reaction in CH<sub>3</sub>CN (3 mL) without MeOH but in the presence of 2 equiv of MeONa.

**Table S2:** Evaluation of various Brønsted bases

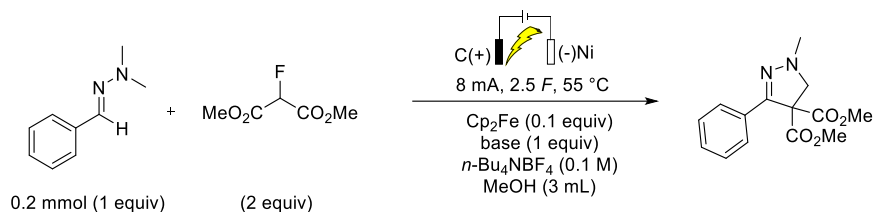

| Entry | Co-solvent                                   | Yield (%) <sup>a</sup> |
|-------|----------------------------------------------|------------------------|
| 1     | Na <sub>2</sub> CO <sub>3</sub>              | 50                     |
| 2     | Na <sub>2</sub> CO <sub>3</sub> <sup>b</sup> | 39                     |
| 3     | Na <sub>2</sub> CO <sub>3</sub> <sup>c</sup> | 51                     |
| 4     | Cs <sub>2</sub> CO <sub>3</sub>              | 31                     |
| 5     | K <sub>2</sub> CO <sub>3</sub>               | 44                     |
| 6     | K <sub>3</sub> PO <sub>4</sub>               | 15                     |
| 7     | NaHCO <sub>3</sub>                           | 48                     |
| 7     | NaOAc                                        | 46                     |
| 8     | 2,6-Lutidine                                 | 42                     |
| 9     | DABCO                                        | 9                      |
| 10    | <i>t</i> -BuONa                              | 25                     |

<sup>a</sup> NMR yield using 1,3,5-trimethoxybenzene as an internal standard.

**Table S3:** Evaluation of various electrolytes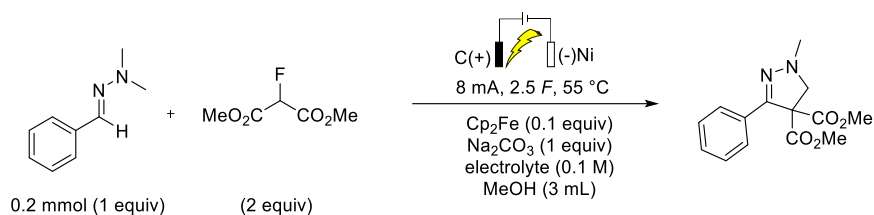

| Entry | electrolyte                                 | Yield (%) <sup>a</sup> |
|-------|---------------------------------------------|------------------------|
| 1     | <i>n</i> -Bu <sub>4</sub> NBF <sub>4</sub>  | 50                     |
| 2     | Et <sub>4</sub> NOTs                        | 54                     |
| 3     | <i>n</i> -Bu <sub>4</sub> NPF <sub>6</sub>  | 26                     |
| 4     | <i>n</i> -Bu <sub>4</sub> NClO <sub>4</sub> | 50                     |
| 5     | LiClO <sub>4</sub>                          | 54                     |
| 6     | LiBF <sub>4</sub>                           | 53                     |
| 7     | NaBF <sub>4</sub>                           | 62                     |
| 8     | KPF <sub>6</sub>                            | 58                     |
| 9     | LiPF <sub>6</sub>                           | 34                     |
| 10    | NH <sub>4</sub> Br                          | 64                     |
| 11    | NaBr                                        | 53                     |
| 12    | Et <sub>4</sub> NBr                         | 58                     |
| 13    | <i>n</i> -Bu <sub>4</sub> NBr               | 8                      |
| 14    | KBr                                         | 11                     |
| 15    | NH <sub>4</sub> I                           | 10                     |
| 16    | NH <sub>4</sub> NO <sub>3</sub>             | 56                     |
| 17    | NH <sub>4</sub> Cl                          | 15                     |

<sup>a</sup> NMR yield using 1,3,5-trimethoxybenzene as an internal standard.

### 3. Preparation of the aldehyde-derived *N,N*-dialkylhydrazones

General procedure A

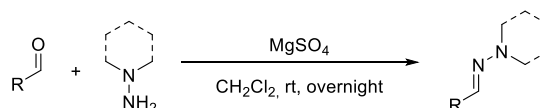

To a suspension of MgSO<sub>4</sub> (2 equiv) in freshly distilled dichloromethane (25 mL) were sequentially added the aldehyde (8 mmol, 1 equiv) and the hydrazine (1.33 equiv) under argon. The resulting mixture was stirred vigorously overnight at room temperature. After filtration and evaporation of the volatiles, the residue was either directly used in the electrochemical transformation (*N,N*-dimethylhydrazone **1a-1n**) or purified by flash column chromatography (hydrazone **1o**).

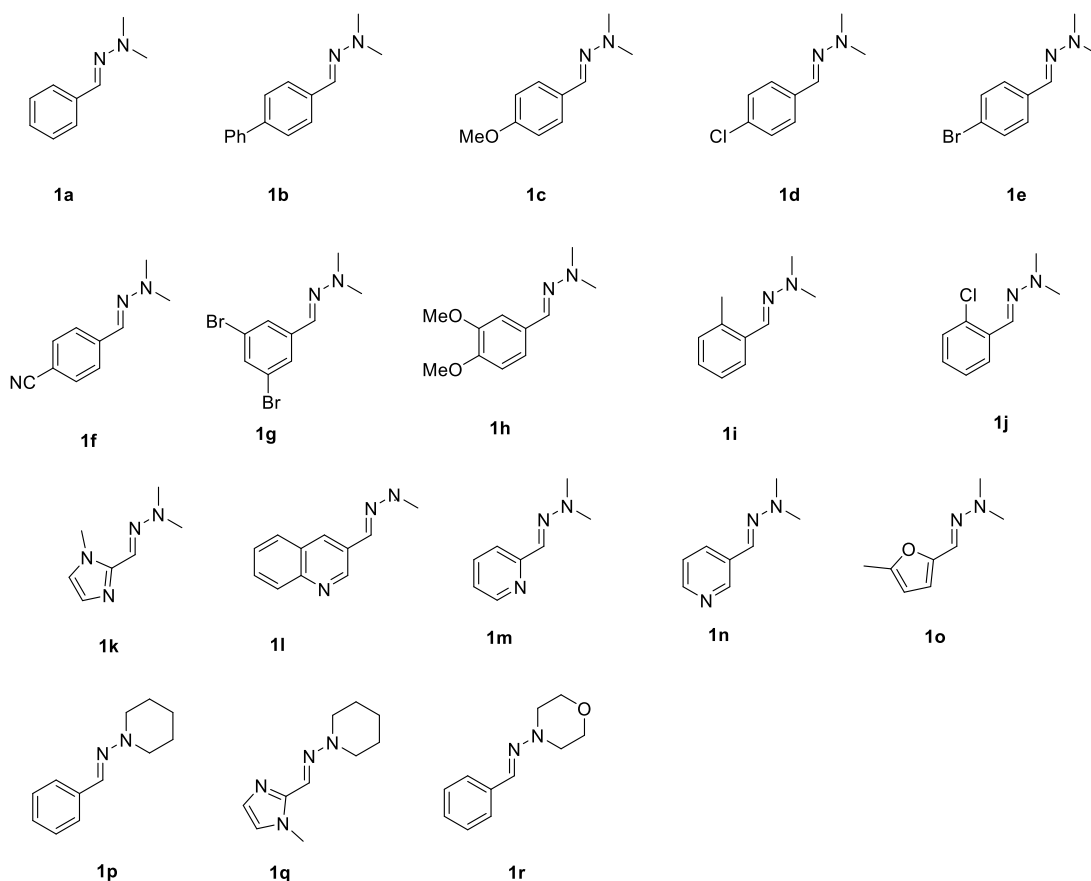

Spectroscopic data of hydrazones **1a-1i** and **1k-1n** matched those reported in the literature.<sup>1</sup>

#### 2-((2,2-dimethylhydrazineylidene)methyl)-1-methyl-1H-imidazole (**1j**)

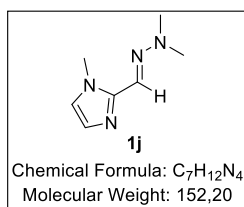

Following the general procedure A using 1-methyl-1H-imidazole-2-carbaldehyde (8 mmol, 881 mg), piperidin-1-amine (810  $\mu$ L) and MgSO<sub>4</sub> (1.93 g), hydrazone **1j** was obtained as black oil (1.166 g 7.66 mmol, 96%).

**IR:**  $\nu$  3370, 2863, 1467, 1042 cm<sup>-1</sup>; **<sup>1</sup>H {<sup>13</sup>C} NMR** (300 MHz, CDCl<sub>3</sub>)  $\delta$  7.31 (d,  $J$  = 0.6 Hz, 1H), 6.99 (d,  $J$  = 1.2 Hz, 1H), 6.79 (d,  $J$  = 1.2 Hz, 1H), 3.86 (s, 3H), 2.95 (s, 6H); **<sup>13</sup>C {<sup>1</sup>H} NMR** (75 MHz, CDCl<sub>3</sub>)  $\delta$  144.3, 127.6, 125.0,

122.7, 42.6, 35.4; **HRMS (ESI<sup>+</sup>):**  $m/z$  calcd for [C<sub>7</sub>H<sub>13</sub>N<sub>4</sub>]<sup>+</sup> ([M+H]<sup>+</sup>): 153.1140, found: 153.1133.

## 4. Electrochemical access to 2-pyrazolines

### 4.1. Synthetic procedure

#### General procedure B

An ElectroSyn undivided cell (10 mL) was charged with a magnetic stir bar, hydrazone **1** (0.4 mmol, 1.0 equiv.), Na<sub>2</sub>CO<sub>3</sub> (42.4 mg, 0.4 mmol, 1 equiv), Cp<sub>2</sub>Fe (7.4 mg, 0.04 mmol, 0.1 equiv), NH<sub>4</sub>Br (79 mg, 0.8 mmol, 2 equiv). The vial was closed with the ElectroSyn cap holding the electrodes (anode: Graphite SK-50, cathode: Nickel plate) and flushed under argon for 2 min. Dimethyl-2-fluoromalonate **2** (120 mg, 0.8 mmol, 2.0 equiv) was added as a solution in MeOH (6 mL). Argon gas (balloon) was bubbled

through the solution during 5 minutes. The electrolysis was carried out at room temperature under constant current (8 mA) and was stopped after 3 h 20 min (electricity = 2.5 F.mol<sup>-1</sup>). The reaction mixture was poured in water (10 mL) and extracted with EtOAc (3x10 mL). The combined organic phases were washed with brine, dried over MgSO<sub>4</sub>, filtered and concentrated under vacuum. The residue was purified by flash column chromatography on silica gel (PE/EtOAc) to yield the desired product.

**1 mmol scale experiment:** An Electrasyn undivided cell (20 mL) was charged with a magnetic stir bar, hydrazone **1k** (152.2 mg, 1 mmol, 1.0 equiv.), Na<sub>2</sub>CO<sub>3</sub> (106 mg, 1 mmol, 1 equiv), Cp<sub>2</sub>Fe (18.6 mg, 0.1 mmol, 0.1 equiv), NH<sub>4</sub>Br (196 mg, 2 mmol, 2 equiv). The vial was closed with the ElectraSyn cap holding the electrodes (anode: Graphite SK-50, cathode: Nickel plate) and flushed under argon for 2 min. Dimethyl-2-fluoromalonate **2** (300 mg, 1 mmol, 2.0 equiv) was added as a solution in MeOH (12 mL). Argon gas (balloon) was bubbled through the solution during 5 minutes. The electrolysis was carried out at room temperature under constant current (8 mA) and was stopped after 8 h 22 min (electricity = 2.5 F.mol<sup>-1</sup>). The reaction mixture was poured in water (20 mL) and extracted with EtOAc (3x20 mL). The combined organic phases were washed with brine, dried over MgSO<sub>4</sub>, filtered and concentrated under vacuum. The residue was purified by flash column chromatography on silica gel (PE/EtOAc) to yield **3k** as a yellow oil (154 mg, 0.549 mmol, 55%).

#### 4.2. Characterization of 2-pyrazolines **3**

##### Dimethyl 1-methyl-3-phenyl-1,5-dihydro-4H-pyrazole-4,4-dicarboxylate (**3a**)

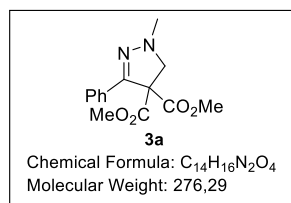

Following the general procedure B using hydrazone **1a** (59.3 mg), **3a** was obtained as a white gum (59.9 mg, 0.217 mmol, 54%).

**IR:**  $\nu$  1080, 1201, 1270, 1435, 1734 cm<sup>-1</sup>; **<sup>1</sup>H {<sup>13</sup>C} NMR** (300 MHz, CDCl<sub>3</sub>):  $\delta$  7.70 – 7.62 (m, 2H), 7.36 – 7.27 (m, 3H), 3.87 (s, 2H), 3.76 (s, 6H), 2.97 (s, 3H); **<sup>13</sup>C {<sup>1</sup>H} NMR** (75 MHz, CDCl<sub>3</sub>):  $\delta$  169.0, 146.6, 131.7, 128.7, 128.3, 126.8, 68.9, 66.5, 53.4, 42.5; **HRMS (ESI<sup>+</sup>):**  $m/z$  calcd for [C<sub>14</sub>H<sub>17</sub>N<sub>2</sub>O<sub>4</sub>]<sup>+</sup> ([M+H]<sup>+</sup>): 277.1188, found: 277.1190.

##### Dimethyl 3-([1,1'-biphenyl]-4-yl)-1-methyl-1,5-dihydro-4H-pyrazole-4,4-dicarboxylate (**3b**)

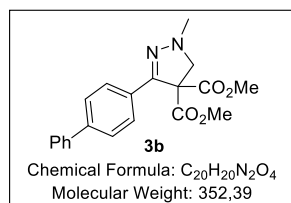

Following the general procedure B using hydrazone **1b** (90 mg), **3b** was obtained as a white gum (71 mg, 0.202 mmol, 50%).

**IR:**  $\nu$  2955, 1732, 1265, 766 cm<sup>-1</sup>; **<sup>1</sup>H {<sup>13</sup>C} NMR** (400 MHz, CDCl<sub>3</sub>):  $\delta$  7.77 – 7.73 (m, 2H), 7.63 – 7.54 (m, 4H), 7.47 – 7.41 (m, 2H), 7.37 – 7.32 (m, 1H), 3.91 (s, 2H), 3.80 (s, 6H), 3.00 (s, 3H); **<sup>13</sup>C {<sup>1</sup>H} NMR** (100 MHz, CDCl<sub>3</sub>):  $\delta$  169.1, 146.2, 141.3, 140.6, 130.6, 128.9, 127.6, 127.2, 127.1,

127.0, 68.8, 66.5, 53.6, 42.6; **HRMS (ESI<sup>+</sup>):**  $m/z$  calcd for [C<sub>20</sub>H<sub>21</sub>N<sub>2</sub>O<sub>4</sub>]<sup>+</sup> ([M+H]<sup>+</sup>): 353.1501, found: 353.1506.

### Dimethyl 3-(4-methoxyphenyl)-1-methyl-1,5-dihydro-4H-pyrazole-4,4-dicarboxylate (3c)

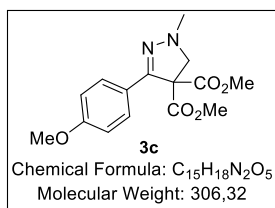

Following the general procedure B using hydrazone **1c** (71 mg), **3c** was obtained as a yellow oil (71 mg, 0.232 mmol, 58%).

**IR:**  $\nu$  2956, 1732, 1250, 835 cm<sup>-1</sup>; **<sup>1</sup>H {<sup>13</sup>C} NMR** (400 MHz, CDCl<sub>3</sub>):  $\delta$  7.65 – 7.56 (m, 2H), 6.86 – 6.82 (m, 2H), 3.83 (s, 2H), 3.80 (s, 3H), 3.76 (s, 6H), 2.93 (s, 3H); **<sup>13</sup>C {<sup>1</sup>H} NMR** (100 MHz, CDCl<sub>3</sub>):  $\delta$  169.1, 160.1, 146.7, 128.4, 124.3, 113.8, 69.0, 66.5, 55.4, 53.5, 42.8; **HRMS (ESI<sup>+</sup>):**  $m/z$  calcd for [C<sub>15</sub>H<sub>19</sub>N<sub>2</sub>O<sub>5</sub>]<sup>+</sup> ([M+H]<sup>+</sup>): 307.1294, found: 307.1295.

### Dimethyl 3-(4-chlorophenyl)-1-methyl-1,5-dihydro-4H-pyrazole-4,4-dicarboxylate (3d)

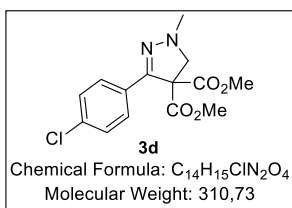

Following the general procedure B using hydrazone **1d** (73 mg) and dimethyl-2-fluoromalonate (90 mg, 0.6 mmol, 1.5 equiv instead of 2 equiv to ease the purification by flash column chromatography), **3c** was obtained as a yellow oil (61 mg, 0.1963 mmol, 49%).

**IR:**  $\nu$  2956, 1732, 1266, 832 cm<sup>-1</sup>; **<sup>1</sup>H {<sup>13</sup>C} NMR** (400 MHz, CDCl<sub>3</sub>):  $\delta$  7.63 – 7.58 (m, 2H), 7.30 – 7.25 (m, 2H), 3.88 (s, 2H), 3.77 (s, 6H), 2.97 (s, 3H); **<sup>13</sup>C {<sup>1</sup>H} NMR** (100 MHz, CDCl<sub>3</sub>):  $\delta$  168.9, 145.3, 134.5, 130.2, 128.5, 128.1, 68.7, 66.4, 53.6, 42.4; **HRMS (ESI<sup>+</sup>):**  $m/z$  calcd for [C<sub>14</sub>H<sub>16</sub>ClN<sub>2</sub>O<sub>4</sub>]<sup>+</sup> ([M+H]<sup>+</sup>): 311.0799, found: 311.0797.

### Dimethyl 3-(4-bromophenyl)-1-methyl-1,5-dihydro-4H-pyrazole-4,4-dicarboxylate (3e)

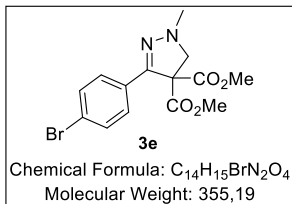

Following the general procedure B using hydrazone **1e** (91 mg) and dimethyl-2-fluoromalonate (90 mg, 0.6 mmol, 1.5 equiv instead of 2 equiv to ease the purification by flash column chromatography), **3e** was obtained as a yellow oil (77 mg, 0.218 mmol, 55%).

**IR:**  $\nu$  2955, 1733, 1267, 829 cm<sup>-1</sup>; **<sup>1</sup>H {<sup>13</sup>C} NMR** (400 MHz, CDCl<sub>3</sub>):  $\delta$  7.56 – 7.52 (m, 2H), 7.46 – 7.42 (m, 2H), 3.88 (s, 2H), 3.77 (s, 6H), 2.97 (s, 3H); **<sup>13</sup>C {<sup>1</sup>H} NMR** (100 MHz, CDCl<sub>3</sub>):  $\delta$  168.9, 145.3, 131.5, 130.7, 128.3, 122.8, 68.7, 66.4, 53.6, 42.4; **HRMS (ESI<sup>+</sup>):**  $m/z$  calcd for [C<sub>14</sub>H<sub>16</sub>BrN<sub>2</sub>O<sub>4</sub>]<sup>+</sup> ([M+H]<sup>+</sup>): 355.0293, found: 355.0291.

### Dimethyl 3-(4-cyanophenyl)-1-methyl-1,5-dihydro-4H-pyrazole-4,4-dicarboxylate (3f)

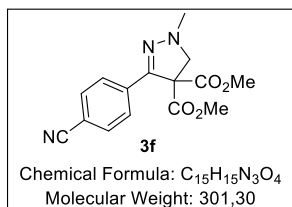

Following the general procedure B using hydrazone **1f** (69 mg), **3f** was obtained as a yellow oil (56 mg, 0.186 mmol, 47%).

**IR:**  $\nu$  2959, 1722, 1267, 769 cm<sup>-1</sup>; **<sup>1</sup>H {<sup>13</sup>C} NMR** (400 MHz, CDCl<sub>3</sub>):  $\delta$  7.77 – 7.74 (m, 2H), 7.59 – 7.56 (m, 2H), 3.95 (s, 2H), 3.78 (s, 6H), 3.02 (s, 3H); **<sup>13</sup>C {<sup>1</sup>H} NMR** (100 MHz, CDCl<sub>3</sub>):  $\delta$  168.6, 143.6, 136.2, 132.0, 126.9, 119.0, 111.4, 68.2, 66.1, 53.7, 42.0; **HRMS (ESI<sup>+</sup>):**  $m/z$  calcd for [C<sub>15</sub>H<sub>16</sub>N<sub>3</sub>O<sub>4</sub>]<sup>+</sup> ([M+H]<sup>+</sup>): 302.1141, found: 302.1141.

### Dimethyl 3-(3,5-dibromophenyl)-1-methyl-1,5-dihydro-4H-pyrazole-4,4-dicarboxylate (3g)

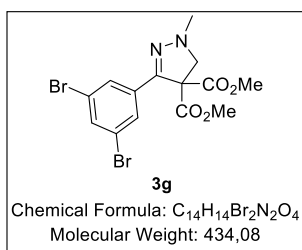

Following the general procedure B using hydrazone **1g** (122 mg), **3g** was obtained as a white gum (95 mg, 0.219 mmol, 55%).

**IR:**  $\nu$  2954, 1734, 1268, 708 cm<sup>-1</sup>; **<sup>1</sup>H {<sup>13</sup>C} NMR** (300 MHz, CDCl<sub>3</sub>):  $\delta$  7.74 (d,  $J$  = 1.7 Hz, 2H), 7.56 (t,  $J$  = 1.7 Hz, 1H), 3.91 (s, 2H), 3.81 (s, 6H), 2.99 (s, 3H); **<sup>13</sup>C {<sup>1</sup>H} NMR** (75 MHz, CDCl<sub>3</sub>):  $\delta$  168.5, 143.0, 135.3, 133.6, 128.3, 122.8, 68.4, 66.3, 53.7, 42.1; **HRMS (ESI<sup>+</sup>):**  $m/z$  calcd for [C<sub>14</sub>H<sub>15</sub>Br<sub>2</sub>N<sub>2</sub>O<sub>4</sub>]<sup>+</sup> ([M+H]<sup>+</sup>): 432.9399, found: 432.9392.

### Dimethyl 3-(3,4-dimethoxyphenyl)-1-methyl-1,5-dihydro-4H-pyrazole-4,4-dicarboxylate (3h)

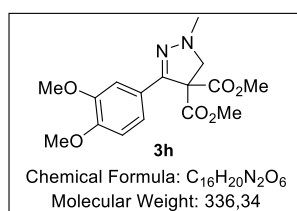

Following the general procedure B using hydrazone **1h** (83 mg), **NF2-220** was obtained as a yellow oil (66 mg, 0.196 mmol, 49%).

**IR:**  $\nu$  2956, 1733, 1251, 729 cm<sup>-1</sup>; **<sup>1</sup>H {<sup>13</sup>C} NMR** (300 MHz, CDCl<sub>3</sub>):  $\delta$  7.35 (d,  $J$  = 2.1 Hz, 1H), 7.12 (dd,  $J$  = 8.4, 2.1 Hz, 1H), 6.78 (d,  $J$  = 8.5 Hz, 1H), 3.88 (s, 3H), 3.87 (s, 3H), 3.84 (s, 2H), 3.76 (s, 6H), 2.93 (s, 3H); **<sup>13</sup>C {<sup>1</sup>H} NMR** (75 MHz, CDCl<sub>3</sub>):  $\delta$  169.1, 149.8, 148.8, 146.6, 124.6, 119.8, 110.6, 109.9, 69.0, 66.6, 55.9, 53.4, 42.7; **HRMS (ESI<sup>+</sup>):**  $m/z$  calcd for [C<sub>16</sub>H<sub>21</sub>N<sub>2</sub>O<sub>6</sub>]<sup>+</sup> ([M+H]<sup>+</sup>): 337.1400, found: 337.1398.

### Dimethyl 1-methyl-3-(o-tolyl)-1,5-dihydro-4H-pyrazole-4,4-dicarboxylate (3i)

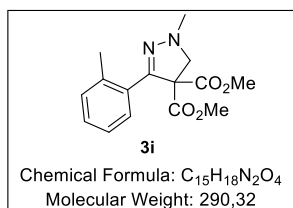

Following the general procedure B using hydrazone **1i** (65 mg), **3i** was obtained as a yellow oil (66 mg, 0.227 mmol, 57%).

**IR:**  $\nu$  2957, 1734, 1270, 1084 cm<sup>-1</sup>; **<sup>1</sup>H {<sup>13</sup>C} NMR** (300 MHz, CDCl<sub>3</sub>):  $\delta$  7.33 – 7.28 (m, 1H), 7.24 – 7.19 (m, 2H), 7.19 – 7.09 (m, 1H), 3.83 (s, 2H), 3.72 (s, 6H), 2.96 (s, 3H), 2.40 (s, 3H); **<sup>13</sup>C {<sup>1</sup>H} NMR** (75 MHz, CDCl<sub>3</sub>):  $\delta$  168.8, 146.5, 138.3, 131.1, 131.0, 128.7, 128.6, 125.3, 71.0, 65.5, 53.3, 42.9, 21.1; **HRMS (ESI<sup>+</sup>):**  $m/z$  calcd for [C<sub>15</sub>H<sub>19</sub>N<sub>2</sub>O<sub>4</sub>]<sup>+</sup> ([M+H]<sup>+</sup>): 291.1345, found: 291.1342.

### Dimethyl 3-(2-chlorophenyl)-1-methyl-1,5-dihydro-4H-pyrazole-4,4-dicarboxylate (3j)

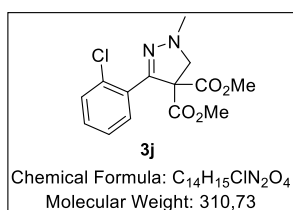

Following the general procedure B using hydrazone **1j** (73 mg), **3j** was obtained as a colorless oil (23 mg, 0.074 mmol, 19%).

**IR:**  $\nu$  2956, 1733, 1172, 760 cm<sup>-1</sup>; **<sup>1</sup>H {<sup>13</sup>C} NMR** (300 MHz, CDCl<sub>3</sub>):  $\delta$  7.64 – 7.55 (m, 1H), 7.40 – 7.35 (m, 1H), 7.33 – 7.26 (m, 2H), 3.86 (s, 2H), 3.72 (s, 6H), 2.98 (s, 3H); **<sup>13</sup>C {<sup>1</sup>H} NMR** (75 MHz, CDCl<sub>3</sub>):  $\delta$  167.8, 144.6, 134.5, 132.2, 131.5, 130.2, 129.3, 126.6, 70.6, 64.0, 53.5, 42.7; **HRMS (ESI<sup>+</sup>):**  $m/z$  calcd for [C<sub>14</sub>H<sub>16</sub>ClN<sub>2</sub>O<sub>4</sub>]<sup>+</sup> ([M+H]<sup>+</sup>): 311.0799, found: 311.0795.



### Dimethyl 1-methyl-3-(1-methyl-1H-imidazol-2-yl)-1,5-dihydro-4H-pyrazole-4,4-dicarboxylate (3k)

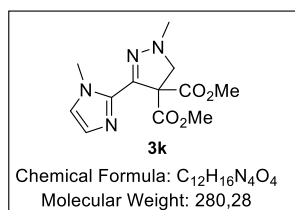

Following the general procedure B using hydrazone **1k** (61 mg), **3k** was obtained as a yellow oil (86 mg, 0.307 mmol, 77%).

**IR:**  $\nu$  2956, 1732, 1270, 727 cm<sup>-1</sup>; **<sup>1</sup>H {<sup>13</sup>C} NMR** (300 MHz, CDCl<sub>3</sub>):  $\delta$  6.99 (d,  $J$  = 1.1 Hz, 1H), 6.82 (d,  $J$  = 1.1 Hz, 1H), 3.83 (s, 3H), 3.77 (s, 2H), 3.75 (s, 6H), 2.92 (s, 3H); **<sup>13</sup>C {<sup>1</sup>H} NMR** (75 MHz, CDCl<sub>3</sub>):  $\delta$  168.9, 141.2, 139.4, 128.7, 123.3, 69.0, 65.7, 53.4, 42.5, 35.5; **HRMS (ESI<sup>+</sup>):**  $m/z$  calcd

for [C<sub>12</sub>H<sub>17</sub>N<sub>4</sub>O<sub>4</sub>]<sup>+</sup> ([M+H]<sup>+</sup>): 281.1250, found: 281.1243.

### Dimethyl 1-methyl-3-(quinolin-3-yl)-1,5-dihydro-4H-pyrazole-4,4-dicarboxylate (3l)

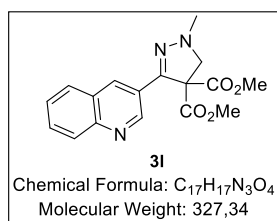

Following the general procedure B using hydrazone **1l** (80 mg), **3l** was obtained as a yellow oil (55 mg, 0.168 mmol, 42%).

**IR:**  $\nu$  2955, 1733, 1268, 753 cm<sup>-1</sup>; **<sup>1</sup>H {<sup>13</sup>C} NMR** (300 MHz, CDCl<sub>3</sub>):  $\delta$  9.30 (d,  $J$  = 2.3 Hz, 1H), 8.28 (d,  $J$  = 1.3 Hz, 1H), 8.07 (d,  $J$  = 8.9 Hz, 1H), 7.81 – 7.75 (m, 1H), 7.68 (ddd,  $J$  = 8.5, 6.9, 1.5 Hz, 1H), 7.52 (ddd,  $J$  = 8.2, 6.9, 1.2 Hz, 1H), 3.96 (s, 2H), 3.79 (s, 6H), 3.05 (s, 3H); **<sup>13</sup>C {<sup>1</sup>H} NMR** (75 MHz, CDCl<sub>3</sub>):  $\delta$  168.7, 149.4, 147.5, 143.5, 132.8, 129.8, 129.3, 128.4, 127.6,

127.1, 125.2, 68.8, 66.0, 53.7, 42.3; **HRMS (ESI<sup>+</sup>):**  $m/z$  calcd for [C<sub>17</sub>H<sub>18</sub>N<sub>3</sub>O<sub>4</sub>]<sup>+</sup> ([M+H]<sup>+</sup>): 328.1297, found: 328.1294.

### Dimethyl 1-methyl-3-(pyridin-2-yl)-1,5-dihydro-4H-pyrazole-4,4-dicarboxylate (3m)

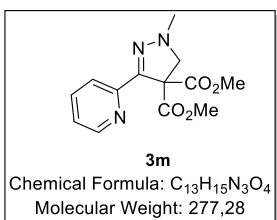

Following the general procedure B using hydrazone **1m** (60 mg), **3m** was obtained as a yellow oil (76 mg, 0.191 mmol, 48%).

**IR:**  $\nu$  2954, 1732, 1268, 794 cm<sup>-1</sup>; **<sup>1</sup>H {<sup>13</sup>C} NMR** (400 MHz, CDCl<sub>3</sub>):  $\delta$  8.47 (ddd,  $J$  = 4.9, 1.8, 1.0 Hz, 1H), 7.90 (dt,  $J$  = 8.0, 1.1 Hz, 1H), 7.63 (ddd,  $J$  = 8.0, 7.5, 1.8 Hz, 1H), 7.14 (ddd,  $J$  = 7.5, 4.9, 1.2 Hz, 1H), 3.90 (s, 2H), 3.76 (s, 6H), 3.01 (s, 3H); **<sup>13</sup>C {<sup>1</sup>H} NMR** (100 MHz, CDCl<sub>3</sub>):  $\delta$  169.4, 150.8, 148.7, 148.4, 136.0, 122.8, 120.7, 67.4, 66.4, 53.4, 42.3; **HRMS (ESI<sup>+</sup>):**  $m/z$

calcd for [C<sub>13</sub>H<sub>16</sub>N<sub>3</sub>O<sub>4</sub>]<sup>+</sup> ([M+H]<sup>+</sup>): 278.1141, found: 278.1140.

### Dimethyl 1-methyl-3-(pyridin-3-yl)-1,5-dihydro-4H-pyrazole-4,4-dicarboxylate (3n)

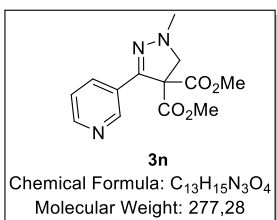

Following the general procedure B using hydrazone **1n** (60 mg), **3n** was obtained as a yellow oil (53 mg, 0.274 mmol, 69%).

**IR:**  $\nu$  2958, 1723, 1268, 769 cm<sup>-1</sup>; **<sup>1</sup>H {<sup>13</sup>C} NMR** (400 MHz, CDCl<sub>3</sub>):  $\delta$  8.84 (dd,  $J$  = 2.3, 0.9 Hz, 1H), 8.47 (dd,  $J$  = 4.8, 1.6 Hz, 1H), 7.95 (ddd,  $J$  = 8.1, 2.3, 1.6 Hz, 1H), 7.22 (ddd,  $J$  = 8.1, 4.8, 0.9 Hz, 1H), 3.88 (s, 2H), 3.75 (s, 6H), 2.96 (s, 3H); **<sup>13</sup>C {<sup>1</sup>H} NMR** (100 MHz, CDCl<sub>3</sub>):  $\delta$  168.5, 149.1, 147.9, 143.2, 133.8, 127.9, 123.1, 68.5, 65.9, 53.6, 42.2; **HRMS (ESI<sup>+</sup>):**  $m/z$  calcd

for [C<sub>13</sub>H<sub>16</sub>N<sub>3</sub>O<sub>4</sub>]<sup>+</sup> ([M+H]<sup>+</sup>): 278.1141, found: 278.1144.

### Dimethyl 1-methyl-3-(5-methylfuran-2-yl)-1,5-dihydro-4H-pyrazole-4,4-dicarboxylate (3o)

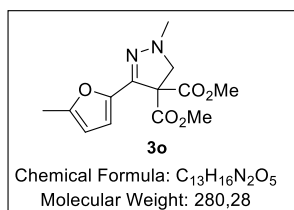

Following the general procedure B using hydrazone **1o** (61 mg), **3o** was obtained as a yellow oil (51 mg, 0.182 mmol, 45%).

**IR:**  $\nu$  2954, 1734, 1268, 709 cm<sup>-1</sup>; **<sup>1</sup>H {<sup>13</sup>C} NMR** (300 MHz, CDCl<sub>3</sub>):  $\delta$  6.43 (dd,  $J$  = 3.4, 0.6 Hz, 1H), 6.00 (dq,  $J$  = 3.2, 1.0 Hz, 1H), 3.82 (s, 2H), 3.77 (s, 6H), 2.95 (s, 3H), 2.32 (s, 3H); **<sup>13</sup>C {<sup>1</sup>H} NMR** (75 MHz, CDCl<sub>3</sub>):  $\delta$  168.5, 153.7, 145.1, 138.9, 111.6, 107.9, 68.5, 65.5, 53.5, 42.7, 13.9; **HRMS (ESI<sup>+</sup>):**  $m/z$  calcd for [C<sub>13</sub>H<sub>17</sub>N<sub>2</sub>O<sub>5</sub>]<sup>+</sup> ([M+H]<sup>+</sup>): 281.1137, found: 281.1138.

### Dimethyl 2-phenyl-4,5,6,7-tetrahydropyrazolo[1,5-a]pyridine-3,3(3aH)-dicarboxylate (3p)

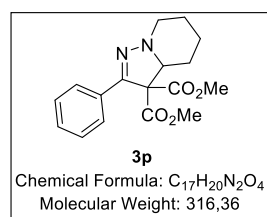

Following the general procedure B using hydrazone **1p** (75.3 mg), **3p** was obtained as a white gum (64 mg, 0.203 mmol, 51%).

**IR:**  $\nu$  2949, 1746, 1718, 1432, 1273, 1235, 1154, 1047, 769 cm<sup>-1</sup>; **<sup>1</sup>H {<sup>13</sup>C} NMR** (400 MHz, CDCl<sub>3</sub>):  $\delta$  7.60 – 7.56 (m, 2H), 7.33 – 7.26 (m, 3H), 3.92 – 3.87 (m, 1H), 3.77 (s, 3H), 3.72 (s, 3H), 2.80 (td,  $J$  = 11.7, 3.5 Hz, 1H), 1.94 – 1.85 (m, 2H), 1.79 – 1.53 (m, 3H), 1.44 – 1.21 (m, 2H); **<sup>13</sup>C {<sup>1</sup>H} NMR** (100 MHz, CDCl<sub>3</sub>):  $\delta$  168.4, 167.5, 146.3, 132.3, 128.5, 128.1, 126.9, 74.0, 70.2, 53.3, 52.8, 52.5, 25.8, 25.0, 24.0; **HRMS (ESI<sup>+</sup>):**  $m/z$  calcd for [C<sub>17</sub>H<sub>21</sub>N<sub>2</sub>O<sub>4</sub>]<sup>+</sup> ([M+H]<sup>+</sup>): 317.1501, found: 317.1515.

### Dimethyl 2-(1-methyl-1H-imidazol-2-yl)-4,5,6,7-tetrahydropyrazolo[1,5-a]pyridine-3,3(3aH)-dicarboxylate (3q)

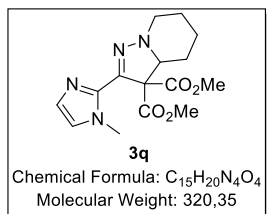

Following the general procedure B using hydrazone **1q** (76.9 mg), **3q** was obtained as a yellow oil (56.3 mg, 0.176 mmol, 44%).

**IR:**  $\nu$  2955, 1737, 1274, 1050 cm<sup>-1</sup>; **<sup>1</sup>H {<sup>13</sup>C} NMR** (300 MHz, CDCl<sub>3</sub>):  $\delta$  7.04 (d,  $J$  = 1.2 Hz, 1H), 6.86 (d,  $J$  = 1.1 Hz, 1H), 3.89 (s, 3H), 3.88 – 3.83 (m, 4H), 3.75 (s, 3H), 3.67 (dd,  $J$  = 11.8, 2.7 Hz, 1H), 2.81 (td,  $J$  = 11.7, 3.4 Hz, 1H), 2.00 – 1.85 (m, 2H), 1.81 – 1.56 (m, 3H), 1.43 – 1.26 (m, 1H); **<sup>13</sup>C {<sup>1</sup>H} NMR** (75 MHz, CDCl<sub>3</sub>):  $\delta$  168.7, 167.2, 128.0, 123.3, 74.0, 70.0, 53.7, 53.0, 52.8, 35.7, 29.8, 25.9, 25.1, 24.0; **HRMS (ESI<sup>+</sup>):**  $m/z$  calcd for [C<sub>15</sub>H<sub>21</sub>N<sub>4</sub>O<sub>4</sub>]<sup>+</sup> ([M+H]<sup>+</sup>): 321.1563, found: 321.1566.

### Dimethyl 2-phenyl-3a,4,6,7-tetrahydro-3H-pyrazolo[5,1-c][1,4]oxazine-3,3-dicarboxylate (3r)

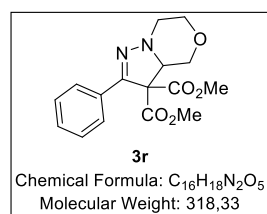

Following the general procedure B using hydrazone **1r** (76.1 mg), **3r** was obtained as a white gum (26.1 mg, 0.082 mmol, 20%).

**IR:**  $\nu$  2955, 1732, 1435, 1266, 1232, 1101 cm<sup>-1</sup>; **<sup>1</sup>H {<sup>13</sup>C} NMR** (400 MHz, CDCl<sub>3</sub>):  $\delta$  7.67 – 7.58 (m, 2H), 7.37 – 7.27 (m, 3H), 4.13 (dd,  $J$  = 10.6, 3.5 Hz, 1H), 3.99 – 3.85 (m, 2H), 3.80 – 3.61 (m, 9H), 3.24 (td,  $J$  = 11.3, 10.7, 3.7 Hz, 1H); **<sup>13</sup>C {<sup>1</sup>H} NMR** (100 MHz, CDCl<sub>3</sub>):  $\delta$  168.0, 167.0, 147.3, 131.8, 128.9, 128.3, 127.0, 70.6, 69.4, 66.5, 66.4, 53.6, 53.1, 51.6; **HRMS (ESI<sup>+</sup>):**  $m/z$  calcd for [C<sub>16</sub>H<sub>19</sub>N<sub>2</sub>O<sub>5</sub>]<sup>+</sup> ([M+H]<sup>+</sup>): 319.1294, found: 319.1292.

### Diethyl 1-methyl-3-phenyl-1,5-dihydro-4H-pyrazole-4,4-dicarboxylate (**3s**)

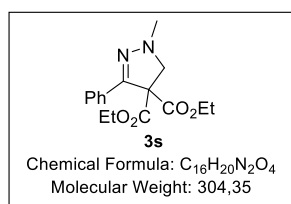

Following the general procedure B using hydrazone **1a** (59.3 mg) and diethylfluoromalonate (120  $\mu$ L) in EtOH at 65 °C instead of MeOH at 55 °C, **3s** was obtained as a colorless oil (86.8 mg, 0.301 mmol, 71%).

**IR:**  $\nu$  2987, 1733, 1266, 1078 cm<sup>-1</sup>; **<sup>1</sup>H {<sup>13</sup>C} NMR** (300 MHz, CDCl<sub>3</sub>):  $\delta$  7.73 – 7.67 (m, 2H), 7.34 – 7.27 (m, 3H), 4.24 (qd,  $J$  = 7.1, 3.8 Hz, 4H), 3.87 (s, 2H), 2.97 (s, 3H), 1.21 (t,  $J$  = 7.1 Hz, 6H); **<sup>13</sup>C {<sup>1</sup>H} NMR** (75 MHz, CDCl<sub>3</sub>):  $\delta$  168.5, 147.1, 131.8, 128.7, 128.1, 127.2, 69.3, 66.3, 62.6, 42.6, 14.0; **HRMS (ESI<sup>+</sup>):**  $m/z$  calcd for [C<sub>16</sub>H<sub>21</sub>N<sub>2</sub>O<sub>4</sub>]<sup>+</sup> ([M+H]<sup>+</sup>): 305.1501, found: 305.1502.

### Diethyl 3-([1,1'-biphenyl]-4-yl)-1-methyl-1,5-dihydro-4H-pyrazole-4,4-dicarboxylate (**3t**)

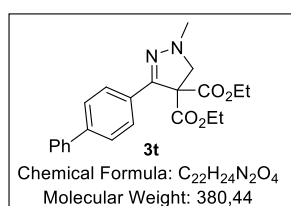

Following the general procedure B using hydrazone **1b** (89.7 mg) and diethylfluoromalonate (120  $\mu$ L) in EtOH at 65 °C instead of MeOH at 55 °C, **3t** was obtained as a yellow gum-oil (97.6 mg, 0.257 mmol, 64%).

**IR:**  $\nu$  2982, 1730, 1262, 766 cm<sup>-1</sup>; **<sup>1</sup>H {<sup>13</sup>C} NMR** (300 MHz, CDCl<sub>3</sub>):  $\delta$  7.84 – 7.76 (m, 2H), 7.65 – 7.53 (m, 4H), 7.49 – 7.40 (m, 2H), 7.34 (t,  $J$  = 7.3 Hz, 1H), 4.27 (qd,  $J$  = 7.1, 3.1 Hz, 4H), 3.91 (s, 2H), 3.00 (s, 3H), 1.25 (t,  $J$  = 7.1 Hz, 6H); **<sup>13</sup>C {<sup>1</sup>H} NMR** (75 MHz, CDCl<sub>3</sub>):  $\delta$  168.5, 146.5, 141.1, 140.6, 130.8, 128.9, 127.5, 127.4, 127.0, 126.7, 69.1, 66.3, 62.6, 42.6, 14.0; **HRMS (ESI<sup>+</sup>):**  $m/z$  calcd for [C<sub>22</sub>H<sub>25</sub>N<sub>2</sub>O<sub>4</sub>]<sup>+</sup> ([M+H]<sup>+</sup>): 381.1814, found: 381.1804.

### Diethyl 3-([1,1'-biphenyl]-4-yl)-1-methyl-1,5-dihydro-4H-pyrazole-4,4-dicarboxylate (**3u**)

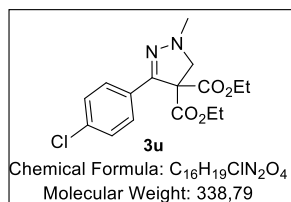

Following the general procedure B using hydrazone **1d** (72.8 mg) and diethylfluoromalonate (120  $\mu$ L) in EtOH at 65 °C instead of MeOH at 55 °C, **3u** was obtained as a yellow oil (69.4 mg, 0.205 mmol, 51%).

**IR:**  $\nu$  2982, 1732, 1262, 1012 cm<sup>-1</sup>; **<sup>1</sup>H {<sup>13</sup>C} NMR** (300 MHz, CDCl<sub>3</sub>):  $\delta$  7.66 (d,  $J$  = 8.7 Hz, 2H), 7.29 (d,  $J$  = 8.7 Hz, 2H), 4.37 – 4.12 (m, 4H), 3.89 (s, 2H), 2.98 (s, 3H), 1.23 (t,  $J$  = 7.1 Hz, 6H); **<sup>13</sup>C {<sup>1</sup>H} NMR** (75 MHz, CDCl<sub>3</sub>):  $\delta$  168.3, 145.5, 134.4, 130.4, 128.3, 128.3, 69.0, 66.2, 62.7, 42.4, 14.0; **HRMS (ESI<sup>+</sup>):**  $m/z$  calcd for [C<sub>16</sub>H<sub>20</sub>ClN<sub>2</sub>O<sub>4</sub>]<sup>+</sup> ([M+H]<sup>+</sup>): 339.1112, found: 339.1110.

### Diethyl 1-methyl-3-(1-methyl-1H-imidazol-2-yl)-1,5-dihydro-4H-pyrazole-4,4-dicarboxylate (**3v**)

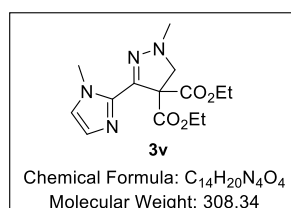

Following the general procedure B using hydrazone **1k** (60.9 mg) and diethylfluoromalonate (120  $\mu$ L) in EtOH at 65 °C instead of MeOH at 55 °C, **3v** was obtained as a yellow oil (52.9 mg, 0.172 mmol, 43%).

**IR:**  $\nu$  2983, 1728, 1265, 1079 cm<sup>-1</sup>; **<sup>1</sup>H {<sup>13</sup>C} NMR** (300 MHz, CDCl<sub>3</sub>):  $\delta$  6.99 (d,  $J$  = 1.1 Hz, 1H), 6.84 (d,  $J$  = 1.1 Hz, 1H), 4.31 – 4.18 (m, 4H), 3.86 (s, 3H), 3.78 (s, 2H), 2.95 (s, 3H), 1.23 (t,  $J$  = 7.1 Hz, 6H); **<sup>13</sup>C {<sup>1</sup>H} NMR** (75 MHz, CDCl<sub>3</sub>):  $\delta$  168.4, 141.5, 139.6, 128.6, 123.0, 69.3, 65.3, 62.3, 42.5, 35.3, 13.8; **HRMS (ESI<sup>+</sup>):**  $m/z$  calcd for [C<sub>14</sub>H<sub>21</sub>N<sub>4</sub>O<sub>4</sub>]<sup>+</sup> ([M+H]<sup>+</sup>): 309.1563, found: 309.1551.

### Methyl 4-acetyl-1-methyl-3-phenyl-4,5-dihydro-1H-pyrazole-4-carboxylate (3w)

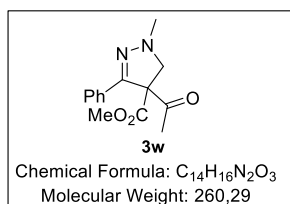

Following the general procedure **B** using hydrazone **1a** (59.3 mg) and methyl 2-fluoro-3-oxobutanoate (107.3 mg), **3w** was obtained as a yellow oil (35 mg, 0.135 mmol, 34%).

**IR:**  $\nu$  2955, 1712, 1260, 693 cm<sup>-1</sup>; **<sup>1</sup>H {<sup>13</sup>C} NMR** (300 MHz, CDCl<sub>3</sub>):  $\delta$  7.64 – 7.59 (m, 2H), 7.35 – 7.28 (m, 3H), 3.89 (d,  $J$  = 10.2 Hz, 1H), 3.76 (s, 3H), 3.70 (d,  $J$  = 16.1 Hz, 1H), 2.98 (s, 3H), 2.25 (s, 3H); **<sup>13</sup>C {<sup>1</sup>H} NMR** (75 MHz, CDCl<sub>3</sub>):  $\delta$  202.0, 169.5, 146.6, 131.8, 128.8, 128.5, 126.8, 75.4, 65.2, 53.2, 42.6, 28.0; **HRMS (ESI<sup>+</sup>)**:  $m/z$  calcd for [C<sub>14</sub>H<sub>17</sub>N<sub>2</sub>O<sub>3</sub>]<sup>+</sup> ([M+H]<sup>+</sup>): 261.1239, found: 261.1233.

## 5. Cyclic voltammetry analysis

Cyclic voltammetry analyses were carried out in a three-electrode cell with a potentiostat.

Working electrode: Glassy Carbon (3 mm diameter); Counter electrode: Pt wire; Reference electrode: AgCl/Ag (aqueous NaCl 3 M).

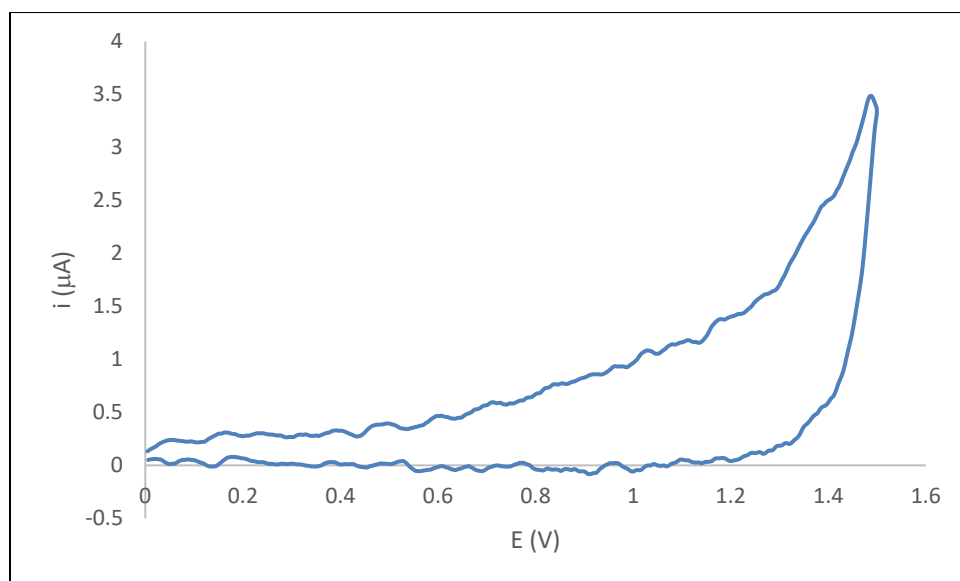

LiClO<sub>4</sub> (0.1M) in MeOH

E (initial) = 0 V; E (high) = 1.5 V; E (end) = 0 V; Sweep rate: 100 mV.s<sup>-1</sup>

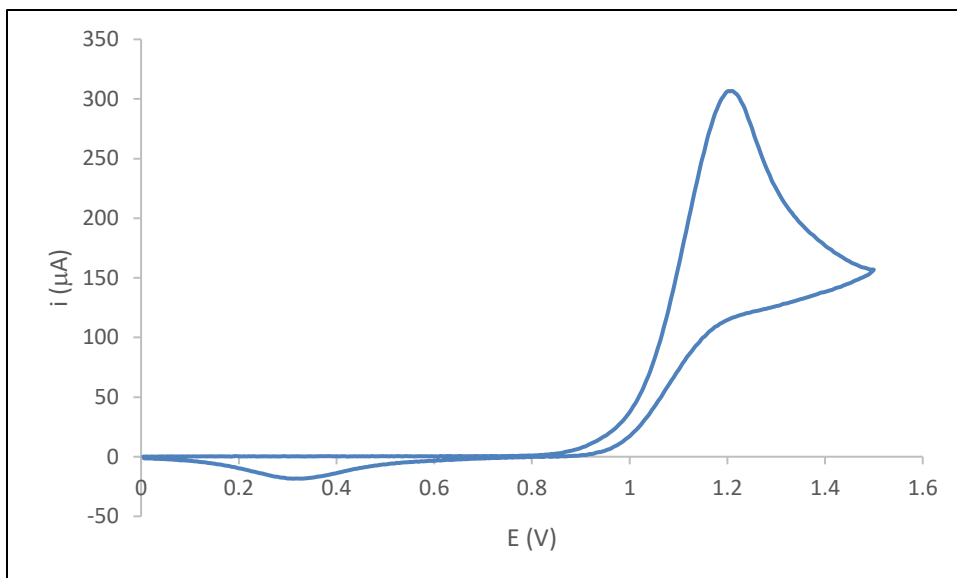

$\text{NH}_4\text{Br}$  (16mM),  $\text{LiClO}_4$  (0.1M) in MeOH

E (initial) = 0 V; E (high) = 1.5 V; E (end) = 0 V; Sweep rate:  $100 \text{ mV}\cdot\text{s}^{-1}$

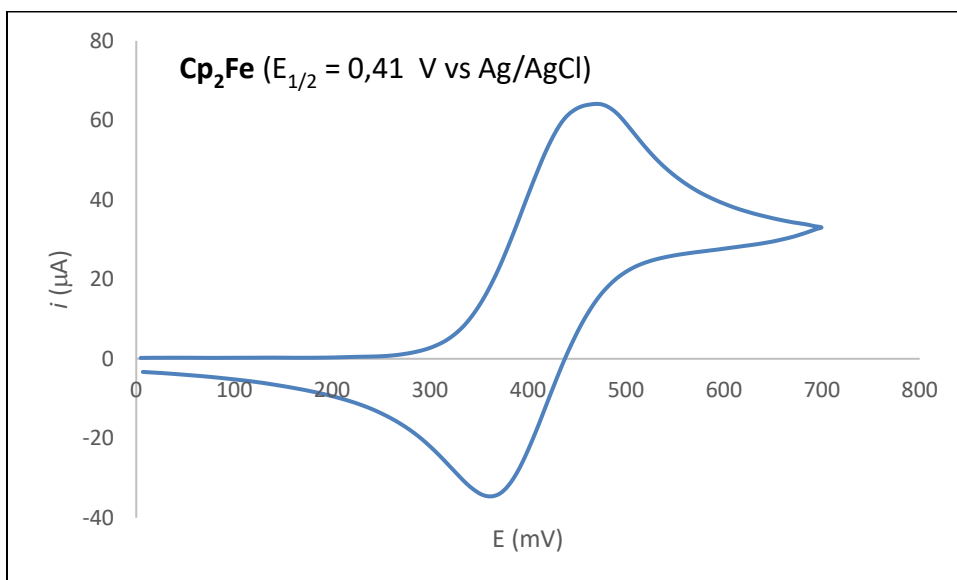

Ferrocene (2.5 mM),  $\text{NH}_4\text{Br}$  (16mM),  $\text{LiClO}_4$  (0.1M) in MeOH

E (initial) = 0 V; E (high) = 700 mV; E (end) = 0 V; Sweep rate:  $100 \text{ mV}\cdot\text{s}^{-1}$ .

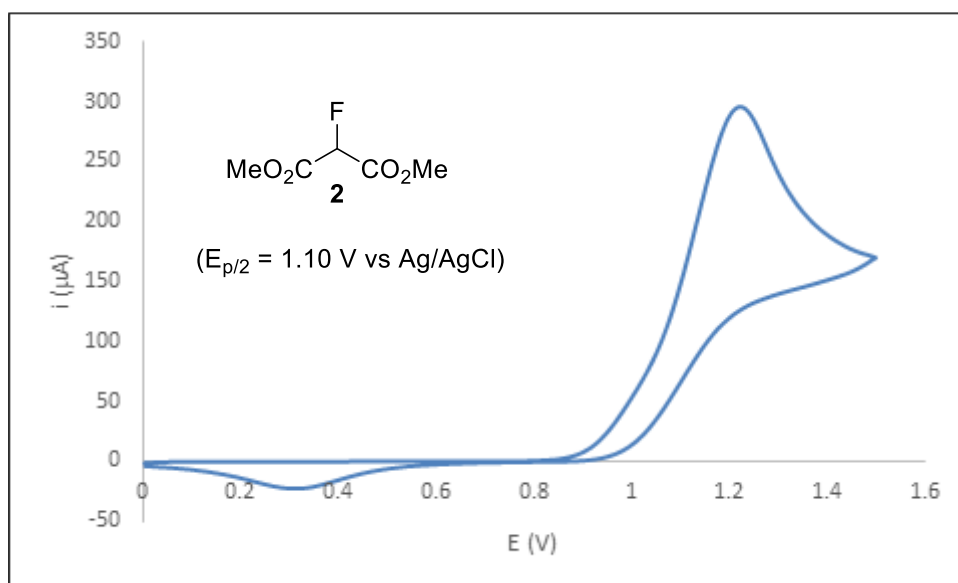

Dimethyl-2-fluoromalonate (8mM),  $\text{NH}_4\text{Br}$  (16mM),  $\text{LiClO}_4$  (0.1M) in MeOH  
 $E$  (initial) = 0 V;  $E$  (high) = 1.5 V;  $E$  (end) = 0 V; Sweep rate:  $100 \text{ mV}\cdot\text{s}^{-1}$

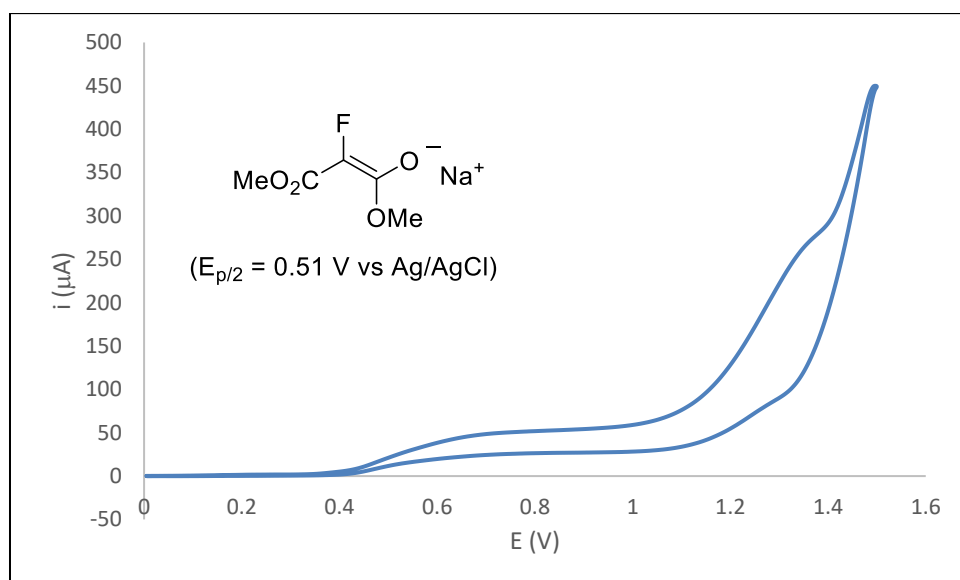

Dimethyl-2-fluoromalonate (8mM), MeONa (32mM),  $\text{NH}_4\text{Br}$  (16mM),  $\text{LiClO}_4$  (0.1M) in MeOH  
 $E$  (initial) = 0 V;  $E$  (high) = 1.5 V;  $E$  (end) = 0 V; Sweep rate:  $100 \text{ mV}\cdot\text{s}^{-1}$

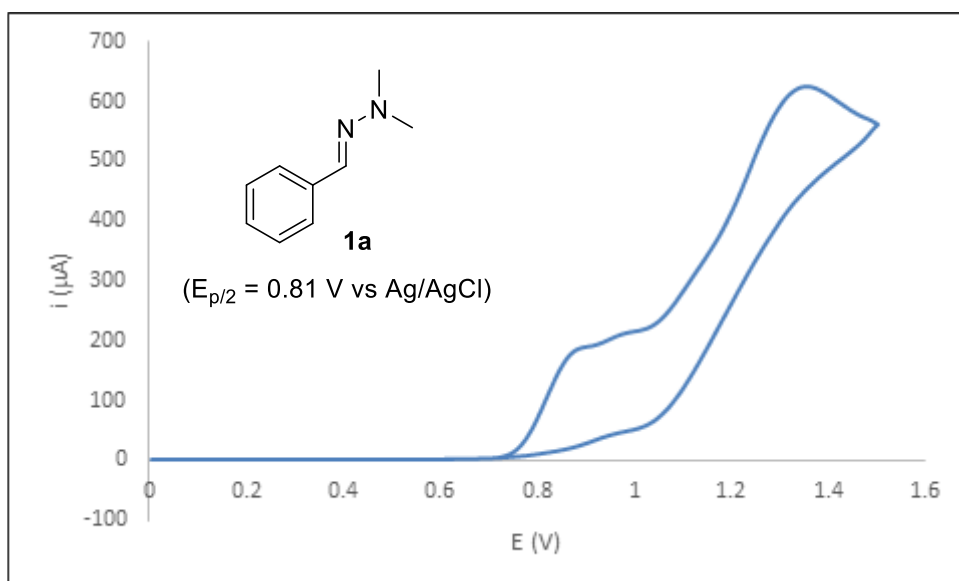

Hydrazone **1a** (8mM),  $\text{NH}_4\text{Br}$  (16mM),  $\text{LiClO}_4$  (0.1M) in MeOH  
 $E$  (initial) = 0 V;  $E$  (high) = 1.5 V;  $E$  (end) = 0 V; Sweep rate:  $100 \text{ mV}\cdot\text{s}^{-1}$

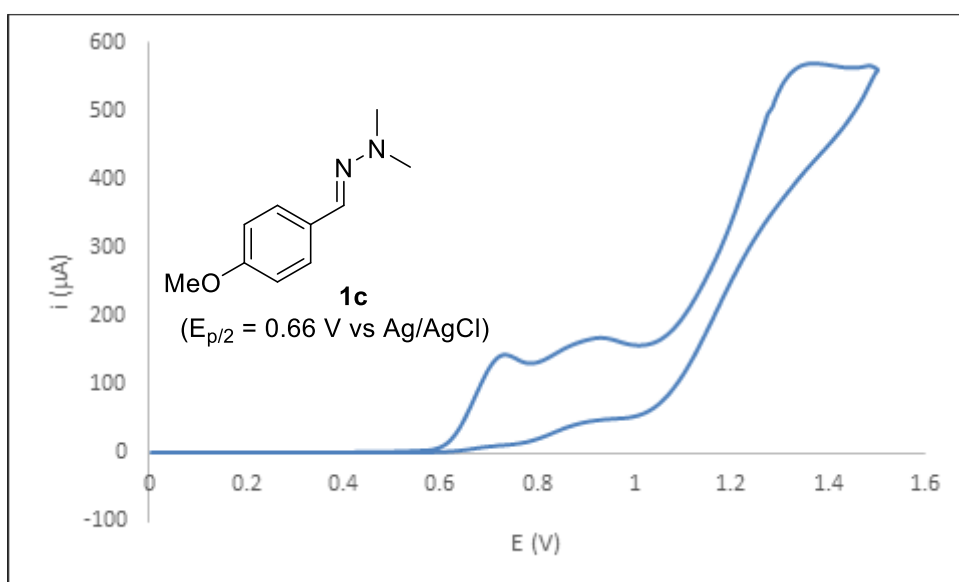

Hydrazone **1c** (8mM),  $\text{NH}_4\text{Br}$  (16mM),  $\text{LiClO}_4$  (0.1M) in MeOH  
 $E$  (initial) = 0 V;  $E$  (high) = 1.5 V;  $E$  (end) = 0 V; Sweep rate:  $100 \text{ mV}\cdot\text{s}^{-1}$

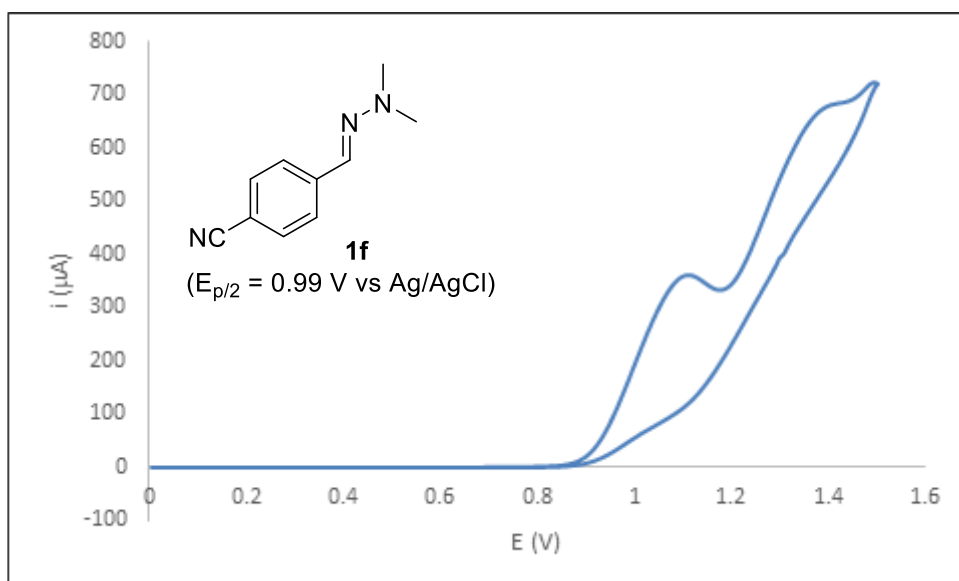

Hydrazone **1f** (8mM),  $\text{NH}_4\text{Br}$  (16mM),  $\text{LiClO}_4$  (0.1M) in MeOH  
 $E$  (initial) = 0 V;  $E$  (high) = 1.5 V;  $E$  (end) = 0 V; Sweep rate:  $100 \text{ mV}\cdot\text{s}^{-1}$

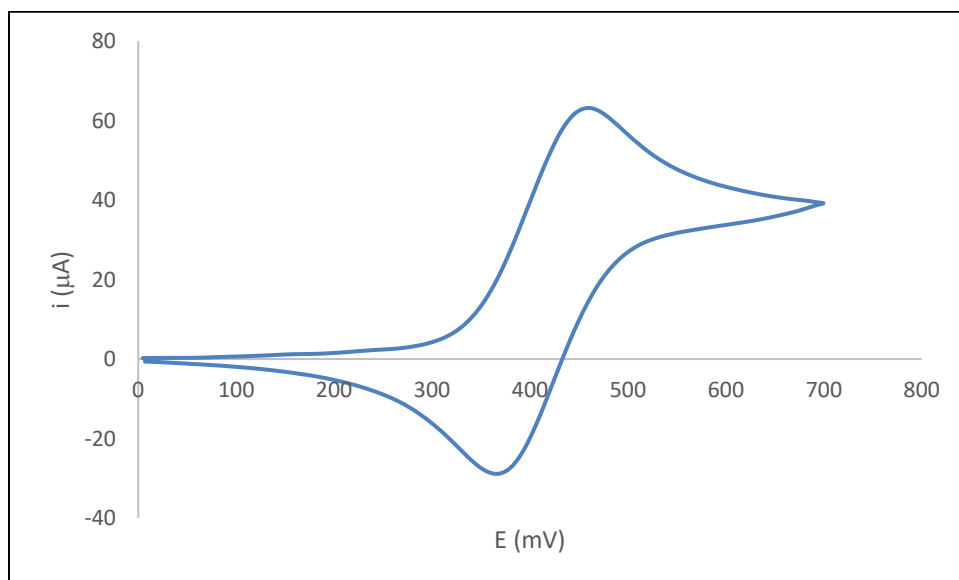

MeONa (32mM), ferrocene (2.5mM),  $\text{NH}_4\text{Br}$  (16mM),  $\text{LiClO}_4$  (0.1M) in MeOH  
 $E$  (initial) = 0 V;  $E$  (high) = 1.5 V;  $E$  (end) = 0 V; Sweep rate:  $100 \text{ mV}\cdot\text{s}^{-1}$



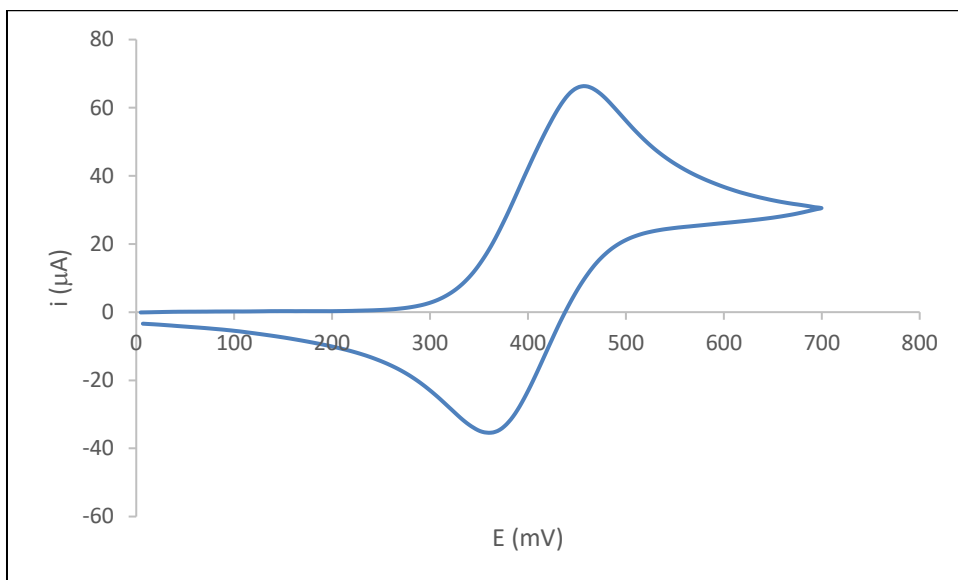

Dimethyl-2-fluoromalonate (8mM), ferrocene (2.5mM),  $\text{NH}_4\text{Br}$  (16mM),  $\text{LiClO}_4$  (0.1M) in MeOH  
 $E$  (initial) = 0 V;  $E$  (high) = 700 mV;  $E$  (end) = 0 V; Sweep rate:  $100 \text{ mV}\cdot\text{s}^{-1}$

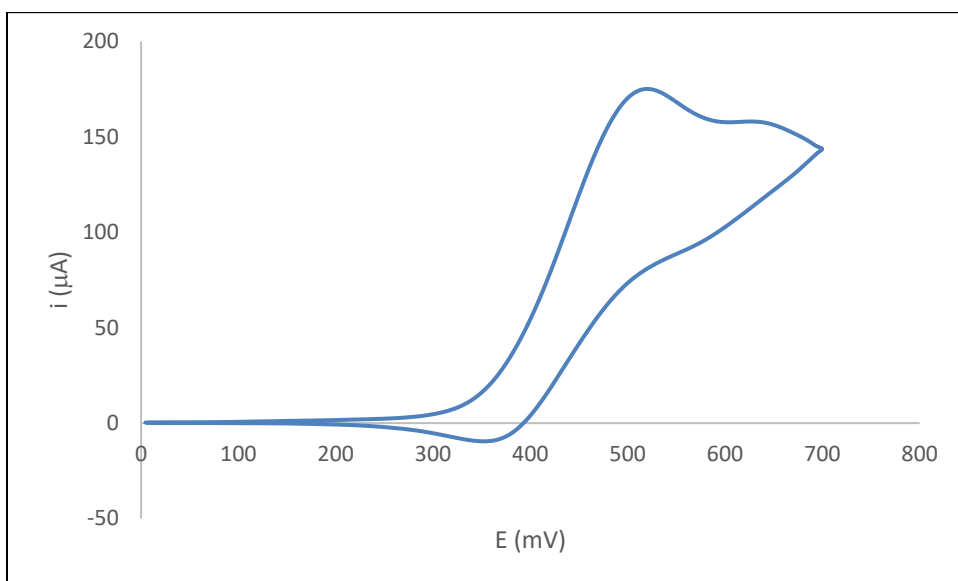

Dimethyl-2-fluoromalonate (8mM), MeONa (32mM), ferrocene (2.5mM),  $\text{NH}_4\text{Br}$  (16mM),  $\text{LiClO}_4$  (0.1M) in MeOH  
 $E$  (initial) = 0 V;  $E$  (high) = 700 mV;  $E$  (end) = 0 V; Sweep rate:  $100 \text{ mV}\cdot\text{s}^{-1}$

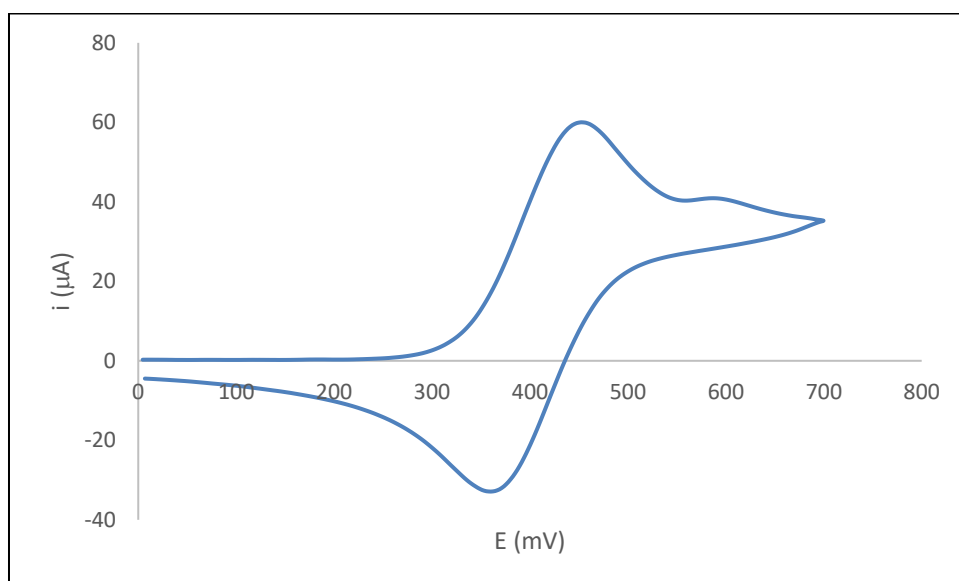

Hydrazone **1a** (8mM), ferrocene (2.5mM),  $\text{NH}_4\text{Br}$  (16mM),  $\text{LiClO}_4$  (0.1M) in MeOH  
E (initial) = 0 V; E (high) = 700 mV; E (end) = 0 V; Sweep rate:  $100 \text{ mV}\cdot\text{s}^{-1}$

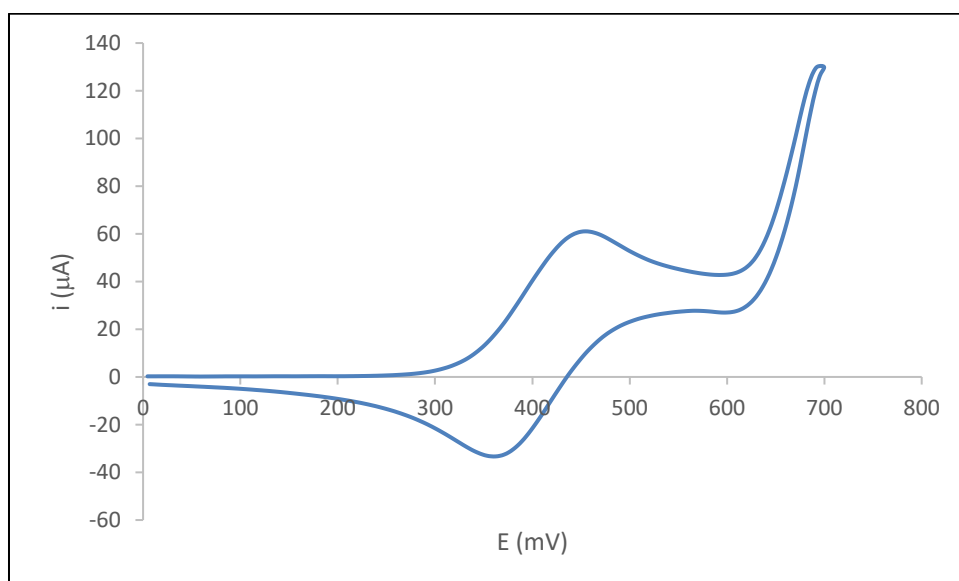

Hydrazone **1c** (8mM), ferrocene (2.5mM),  $\text{NH}_4\text{Br}$  (16mM),  $\text{LiClO}_4$  (0.1M) in MeOH  
E (initial) = 0 V; E (high) = 700 mV; E (end) = 0 V; Sweep rate:  $100 \text{ mV}\cdot\text{s}^{-1}$

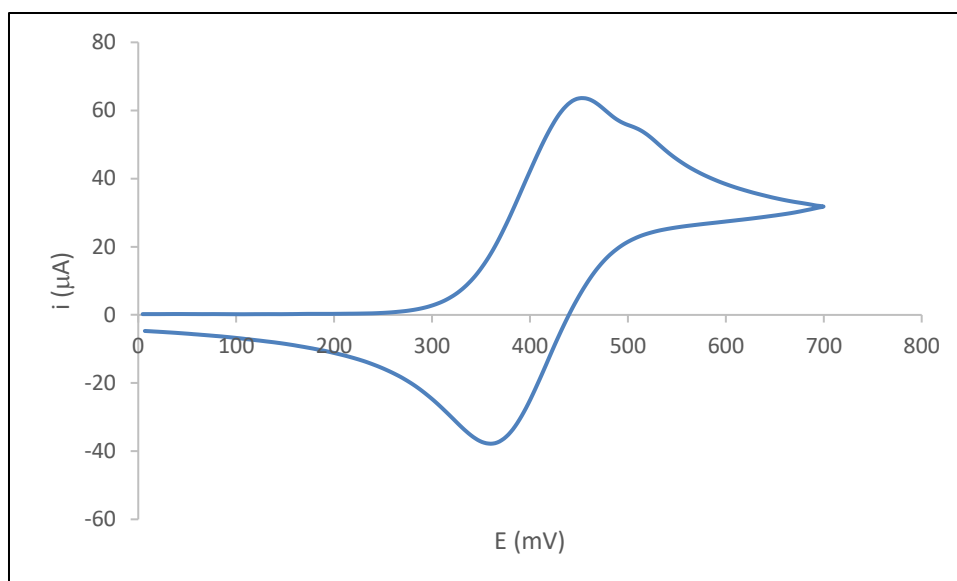

Hydrazone **1f** (8mM), ferrocene (2.5mM),  $\text{NH}_4\text{Br}$  (16mM),  $\text{LiClO}_4$  (0.1M) in MeOH  
 E (initial) = 0 V; E (high) = 700 mV; E (end) = 0 V; Sweep rate:  $100 \text{ mV}\cdot\text{s}^{-1}$

## 6. Radical trapping experiment

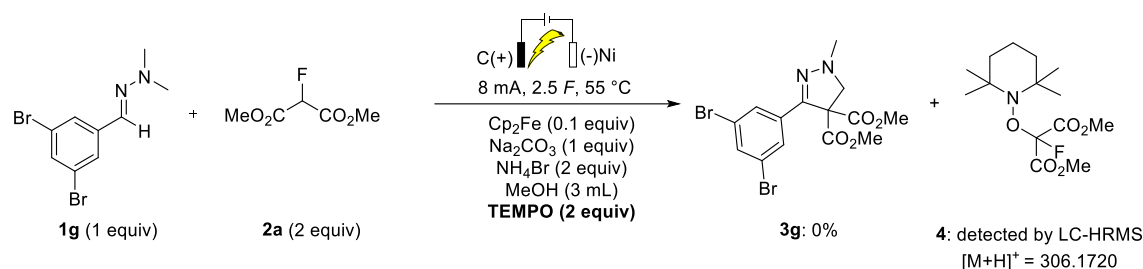

An Electrasyn undivided cell (5 mL) was charged with a magnetic stir bar, hydrazone **1g** (61 mg, 0.2 mmol, 1.0 equiv.),  $\text{Na}_2\text{CO}_3$  (21.2 mg, 0.2 mmol, 1 equiv),  $\text{Cp}_2\text{Fe}$  (3.7 mg, 0.02 mmol, 0.1 equiv),  $\text{NH}_4\text{Br}$  (39.2 mg, 0.4 mmol, 2 equiv). The vial was closed with the ElectraSyn cap holding the electrodes (anode: Graphite SK-50, cathode: Nickel plate) and flushed under argon for 2 min. Dimethyl-2-fluoromalonate **2** (60 mg, 0.4 mmol, 2.0 equiv) was added as a solution in MeOH (6 mL). Argon gas (balloon) was bubbled through the solution during 5 minutes. The electrolysis was carried out at room temperature under constant current (8 mA) and was stopped after 1 h 40 min (electricity =  $2.5 \text{ F}\cdot\text{mol}^{-1}$ ). 1,3,5-trimethoxybenzene (16.8 mg, 0.1 mmol) was added as NMR internal standard. The reaction mixture was poured in water (10 mL) and extracted with EtOAc (3x10 mL). The combined organic phases were washed with brine, dried over  $\text{MgSO}_4$ , filtered and concentrated under vacuum.  $^1\text{H}$  NMR analysis of the crude reaction mixture indicated total recovery of hydrazone **1g** while **3g** could not be detected. Additionally, TEMPO adduct **4** was detected by LC-HRMS. HRMS (ESI<sup>+</sup>):  $m/z$  calcd for  $[\text{C}_{14}\text{H}_{25}\text{NO}_5\text{F}]^+$  ( $[\text{M}+\text{H}]^+$ ): 306.1717, found: 306.1720.

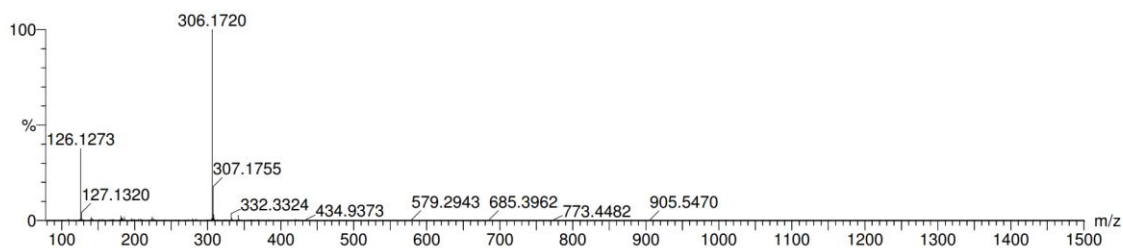

Minimum: -1.5  
 Maximum: 100.0

| Mass     | Calc. Mass | mDa | PPM | DBE | i-FIT  | i-FIT (Norm) | Formula        |
|----------|------------|-----|-----|-----|--------|--------------|----------------|
| 306.1720 | 306.1717   | 0.3 | 1.0 | 2.5 | 1808.7 | 0.0          | C14 H25 N O5 F |

## References

<sup>1</sup> (a) Dubrovskiy, A. V.; Larock, R. C. *Org. Lett.* **2011**, *13*, 4136. (b) Cioc, R. C.; Crockatt, M.; van der Waal, J. C.; Bruijninx, P. C. A. *ChemSusChem*. **2022**, *15*, e202201139. (c) Ros, A.; Estepa, B.; López-Rodríguez, R.; Álvarez, E.; Fernández, R.; Lassaletta, J. M. *Angew. Chem. Int. Ed.* **2011**, *50*, 11724. (d) Tan, Z.; Zhang, S.; Zhang, Y.; Li, Y.; Ni, M.; Feng, B. *J. Org. Chem.* **2017**, *82*, 9384. (e) Ros, A.; López-Rodríguez, R.; Estepa, B.; Álvarez, E.; Fernández, R.; Lassaletta, J. M. *J. Am. Chem. Soc.* **2012**, *134*, 4573. (f) Li, X.; Golz, C.; Alcarazo, M. *Angew. Chem. Int. Ed.* **2021**, *60*, 694.

## 7. NMR spectra

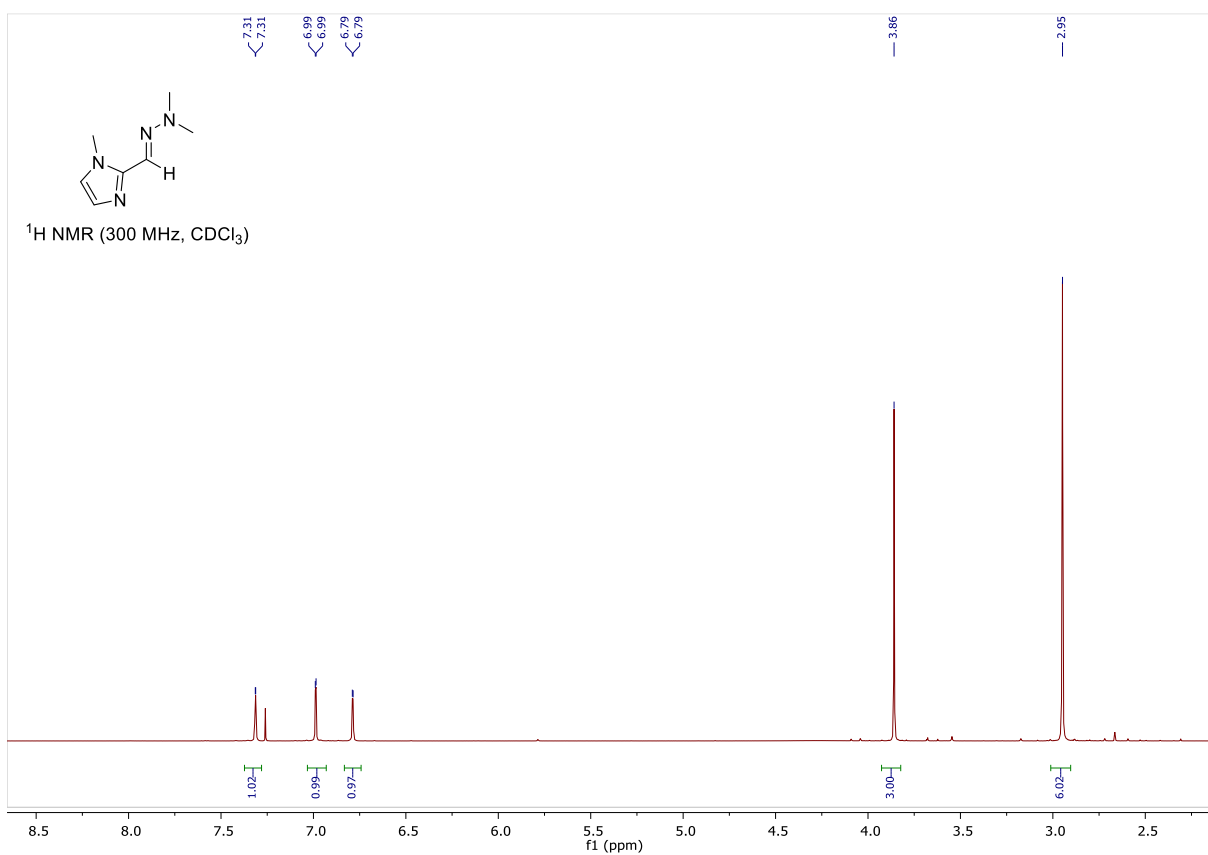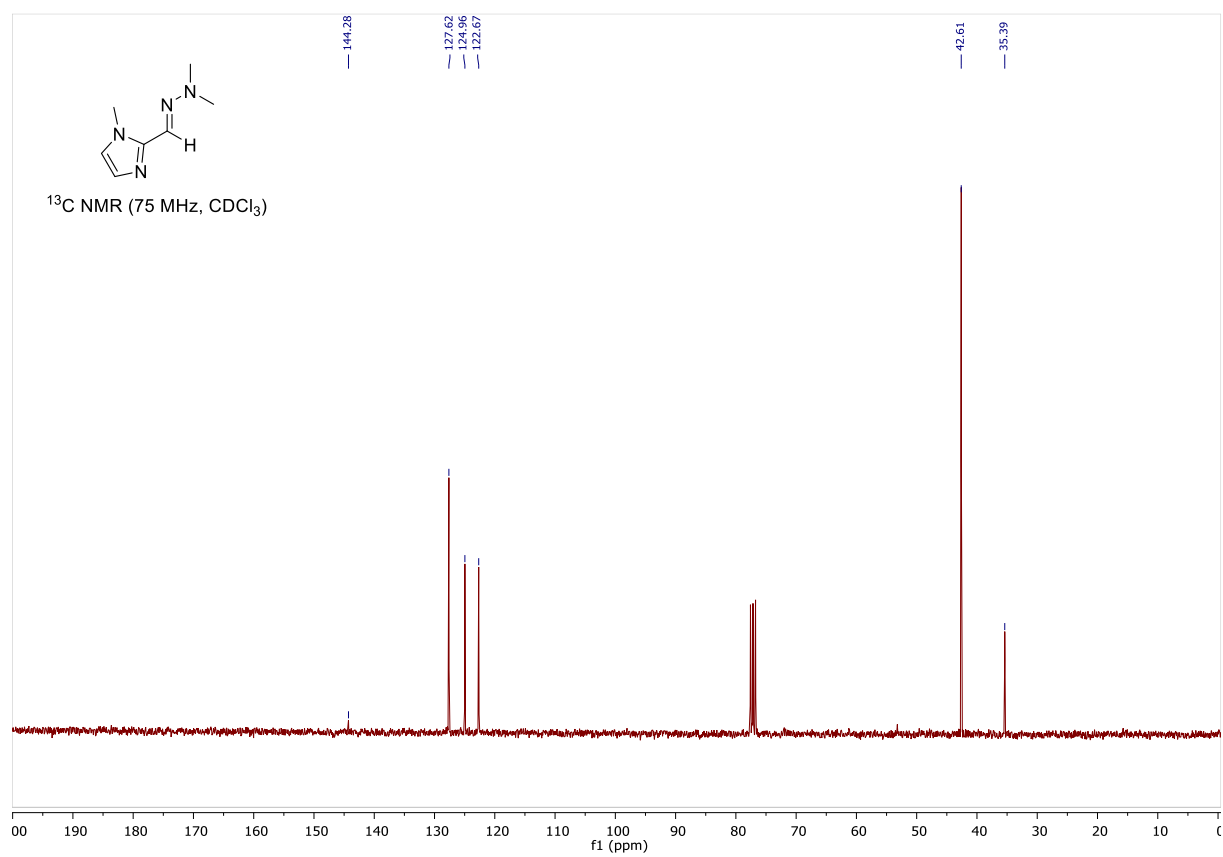

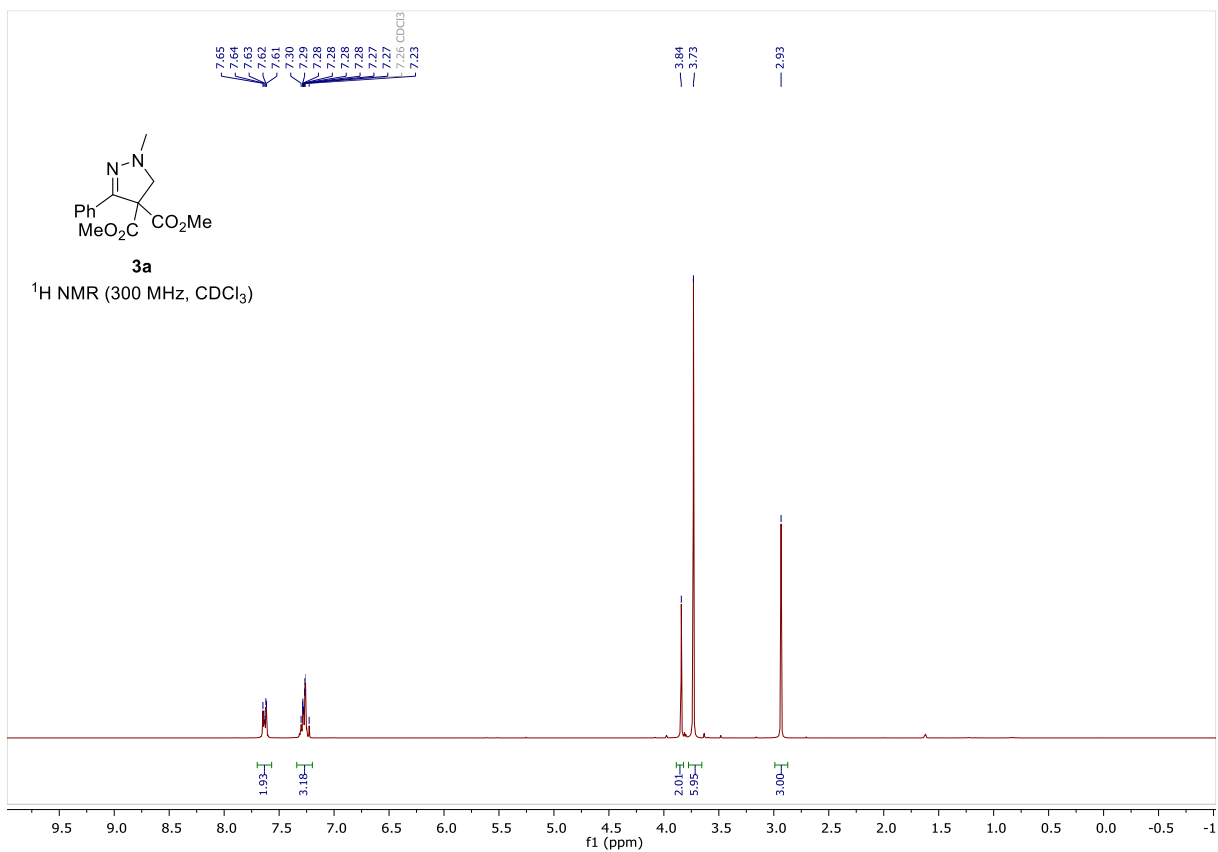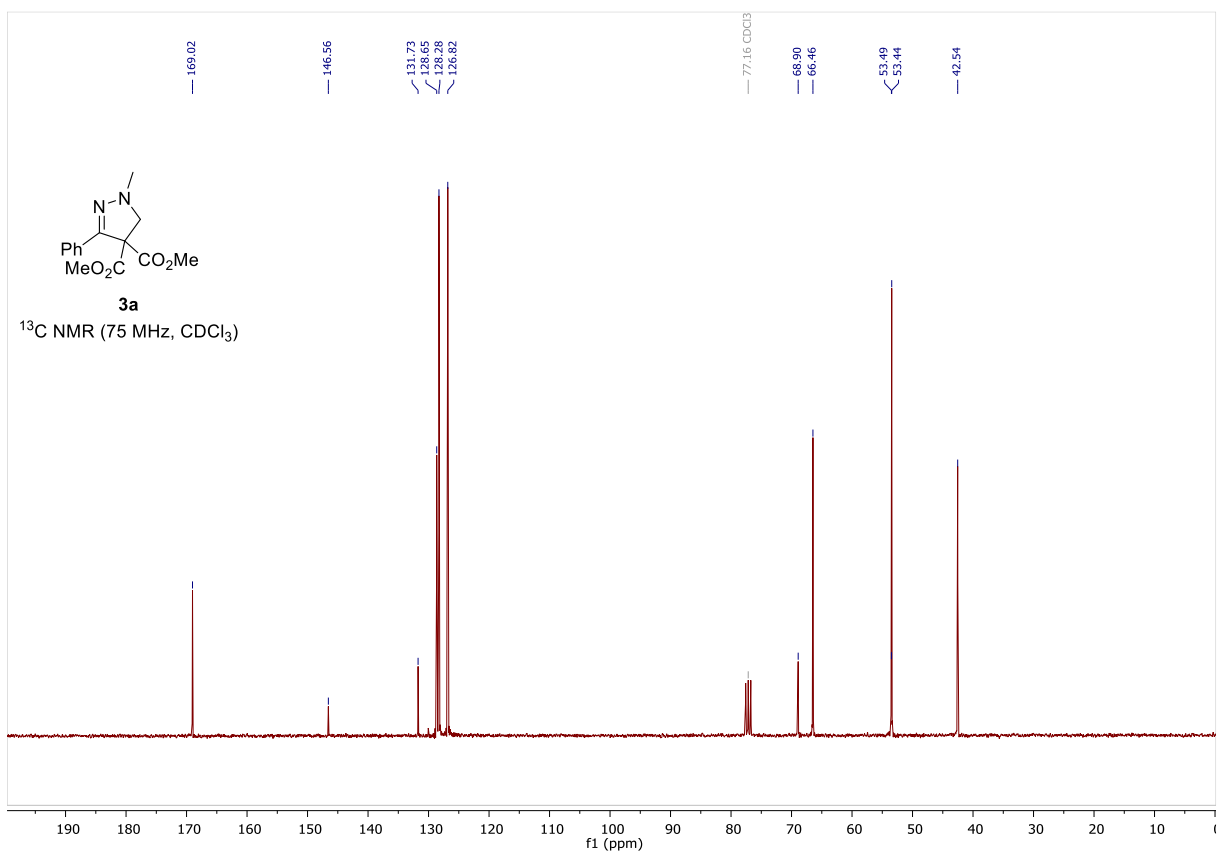

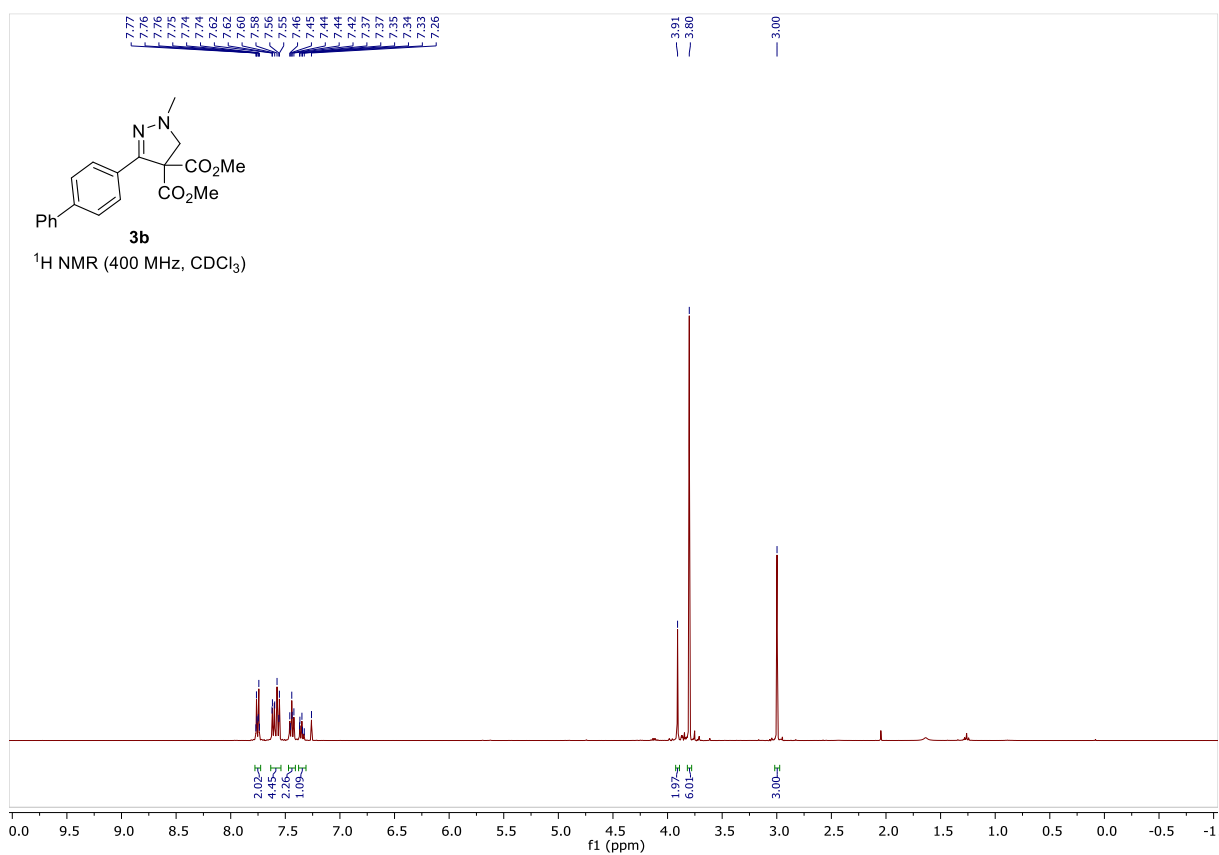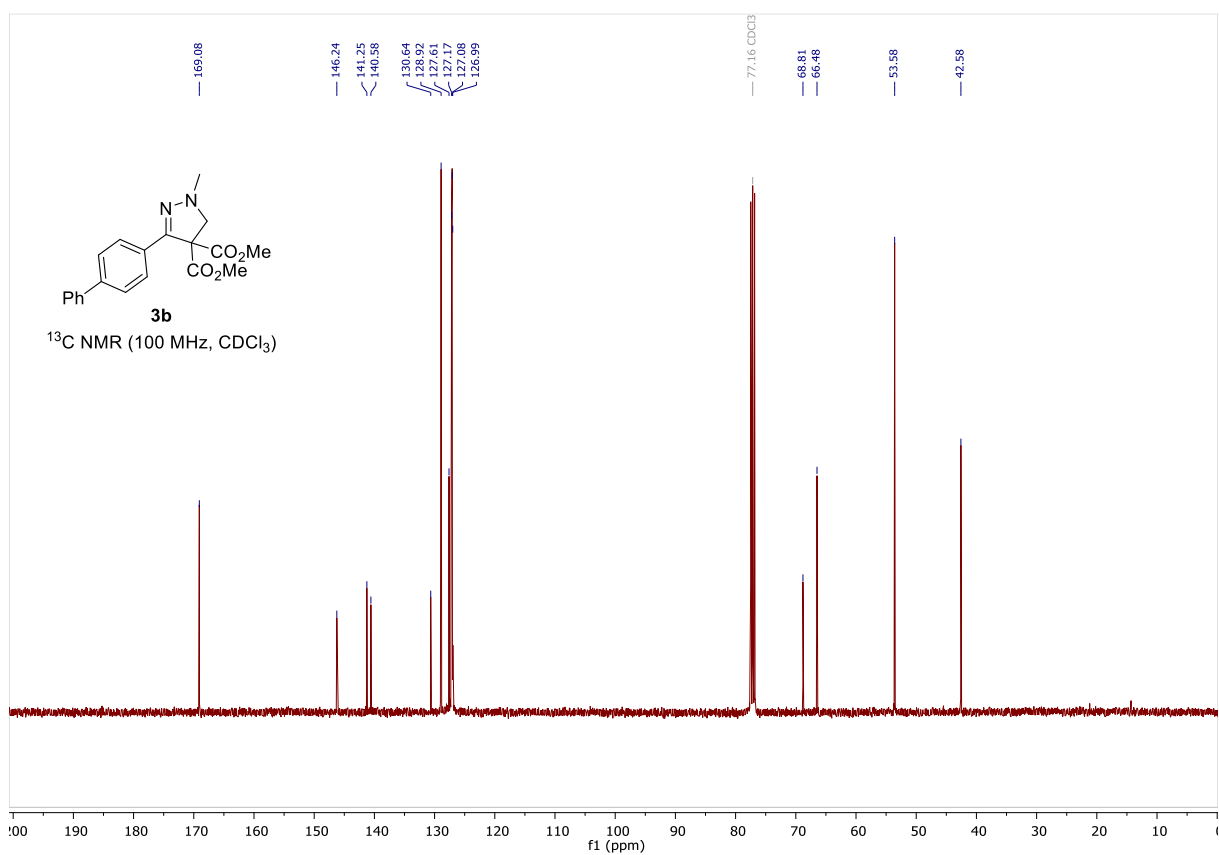

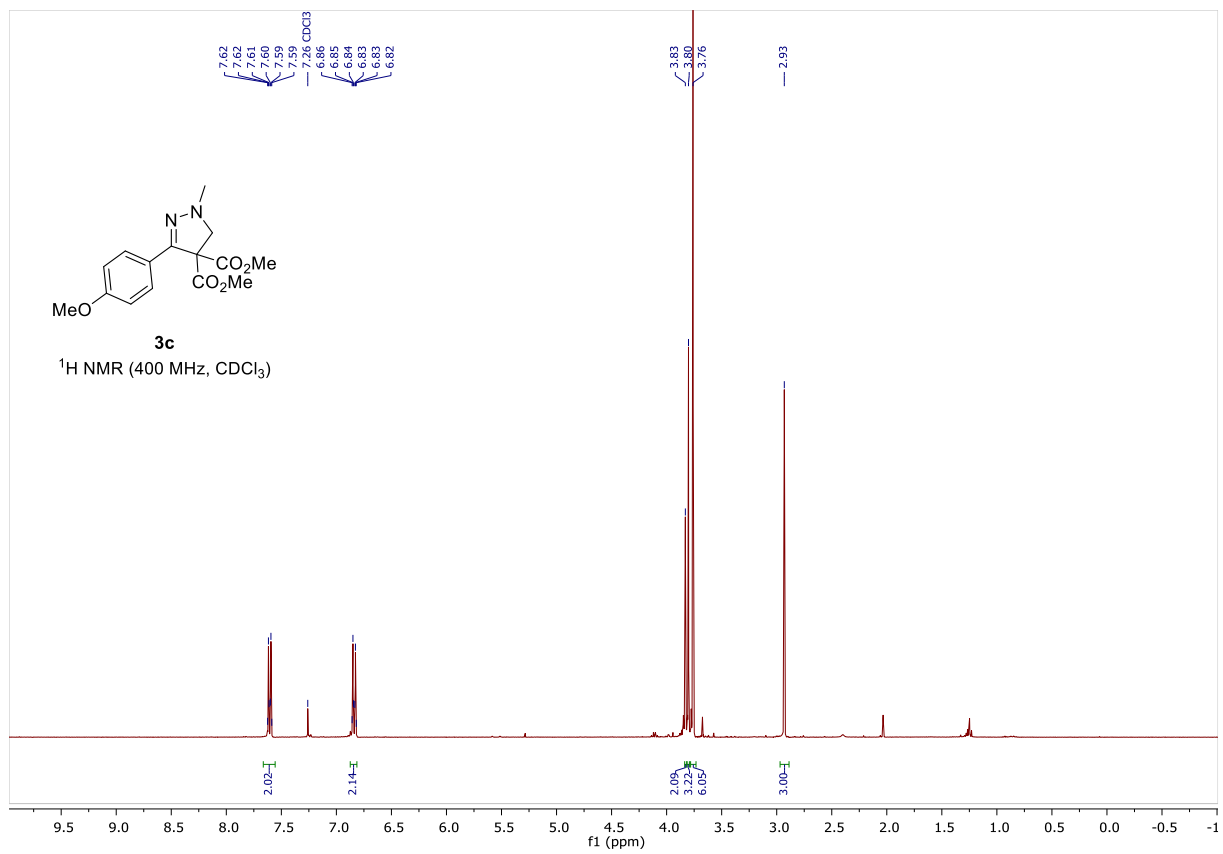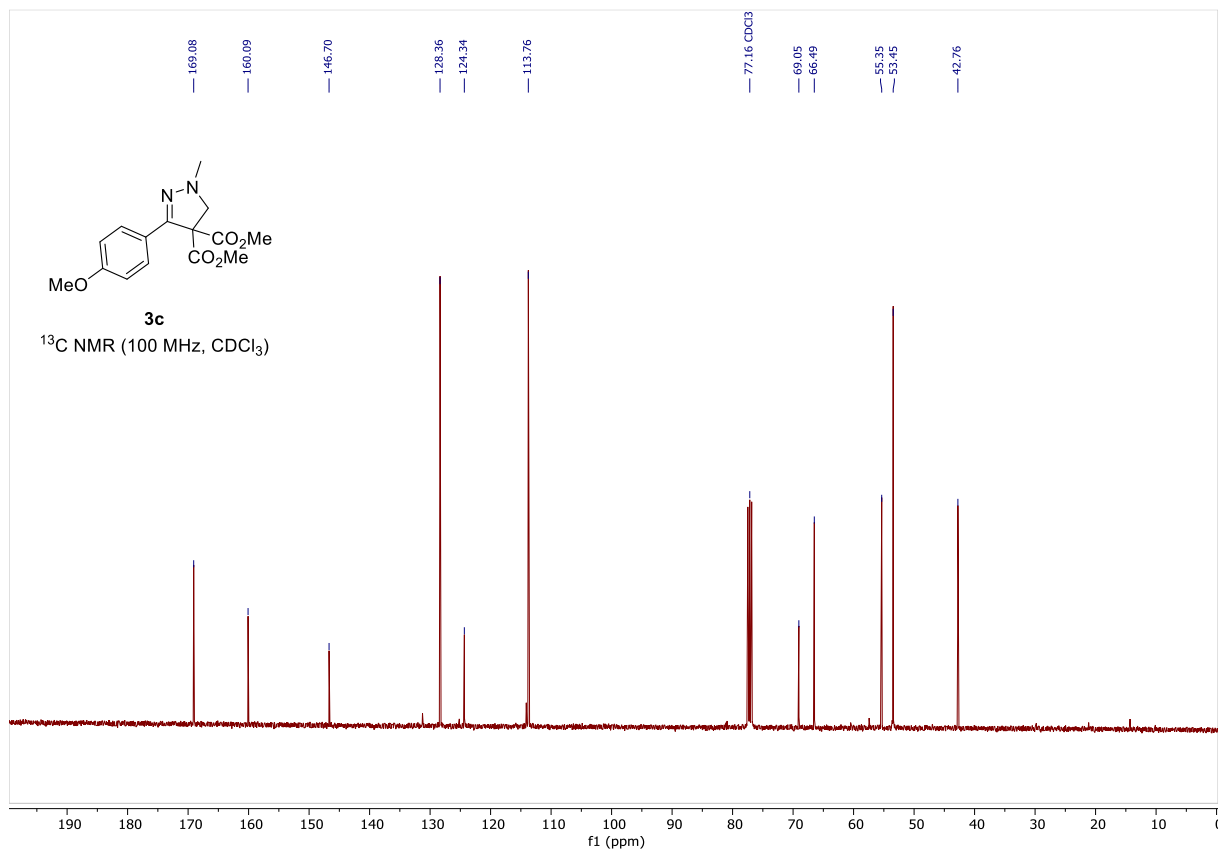





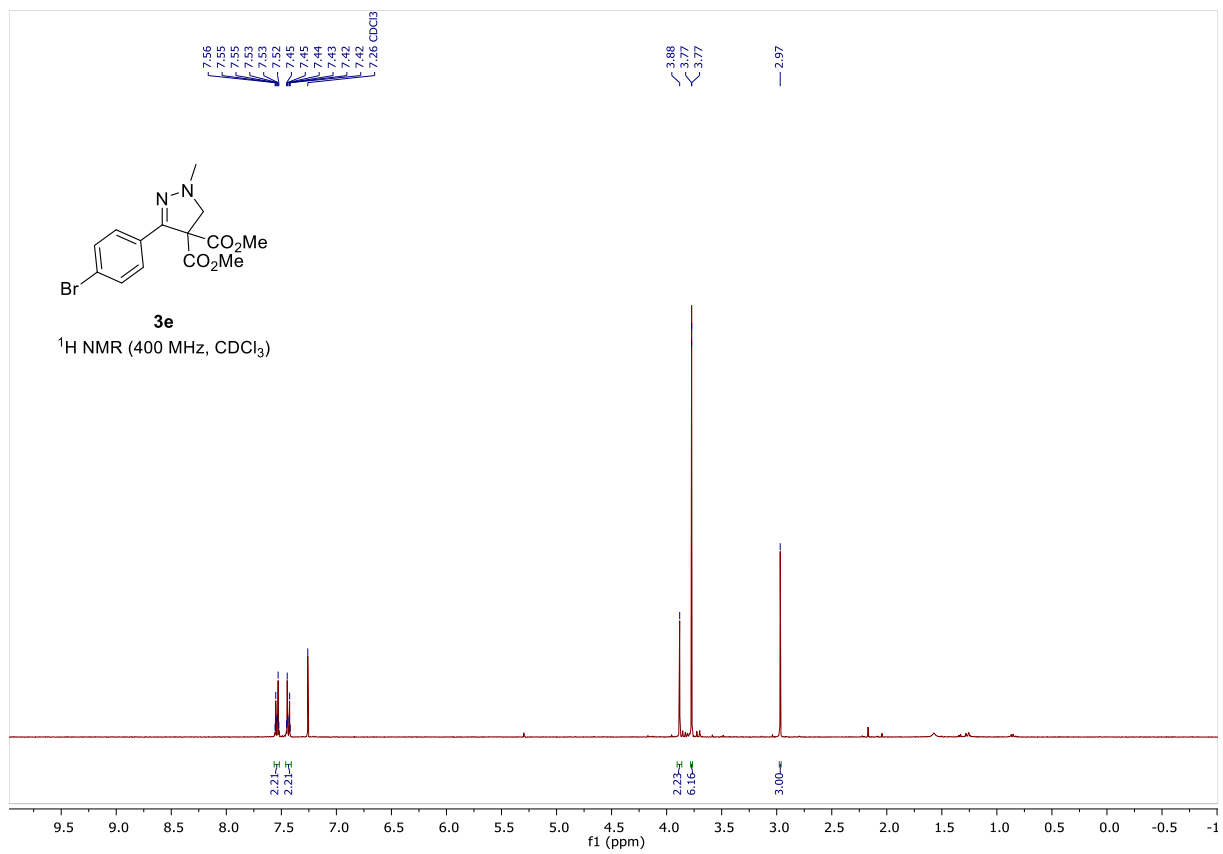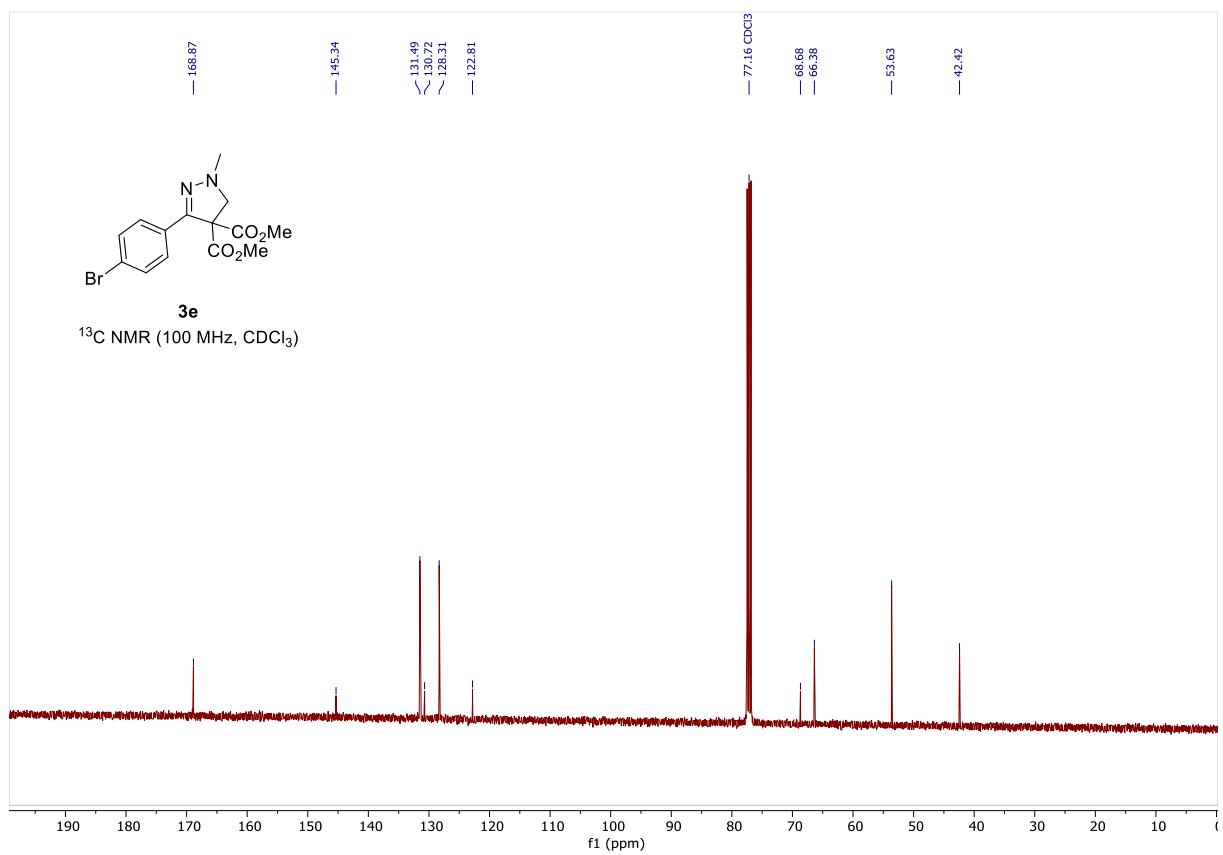

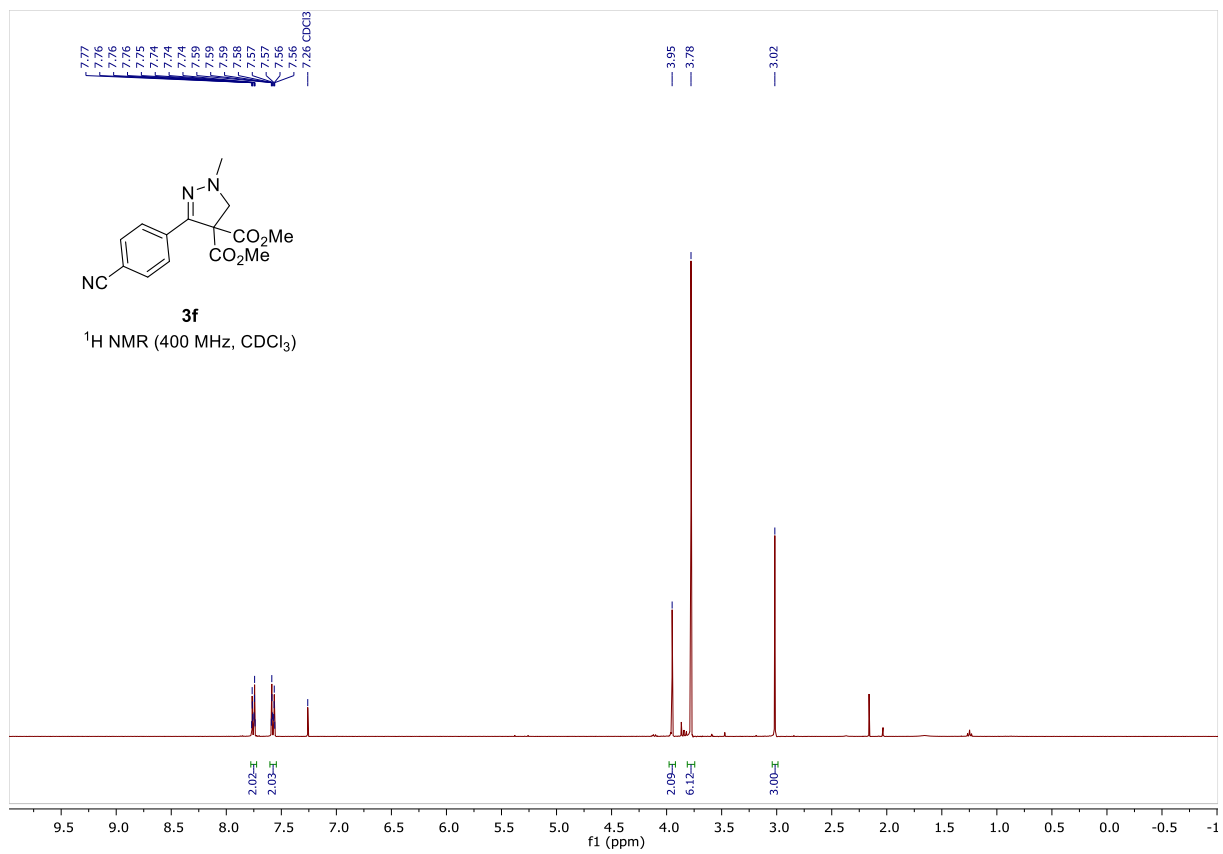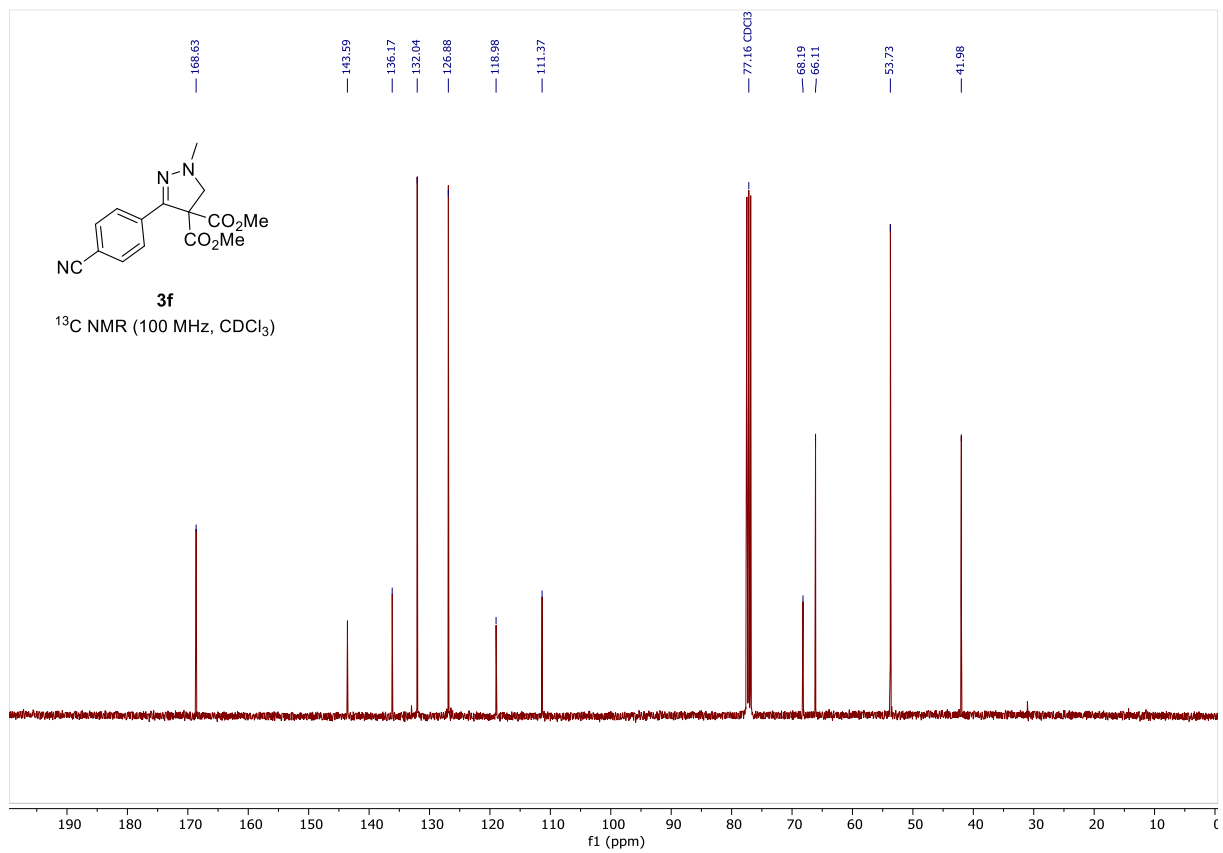

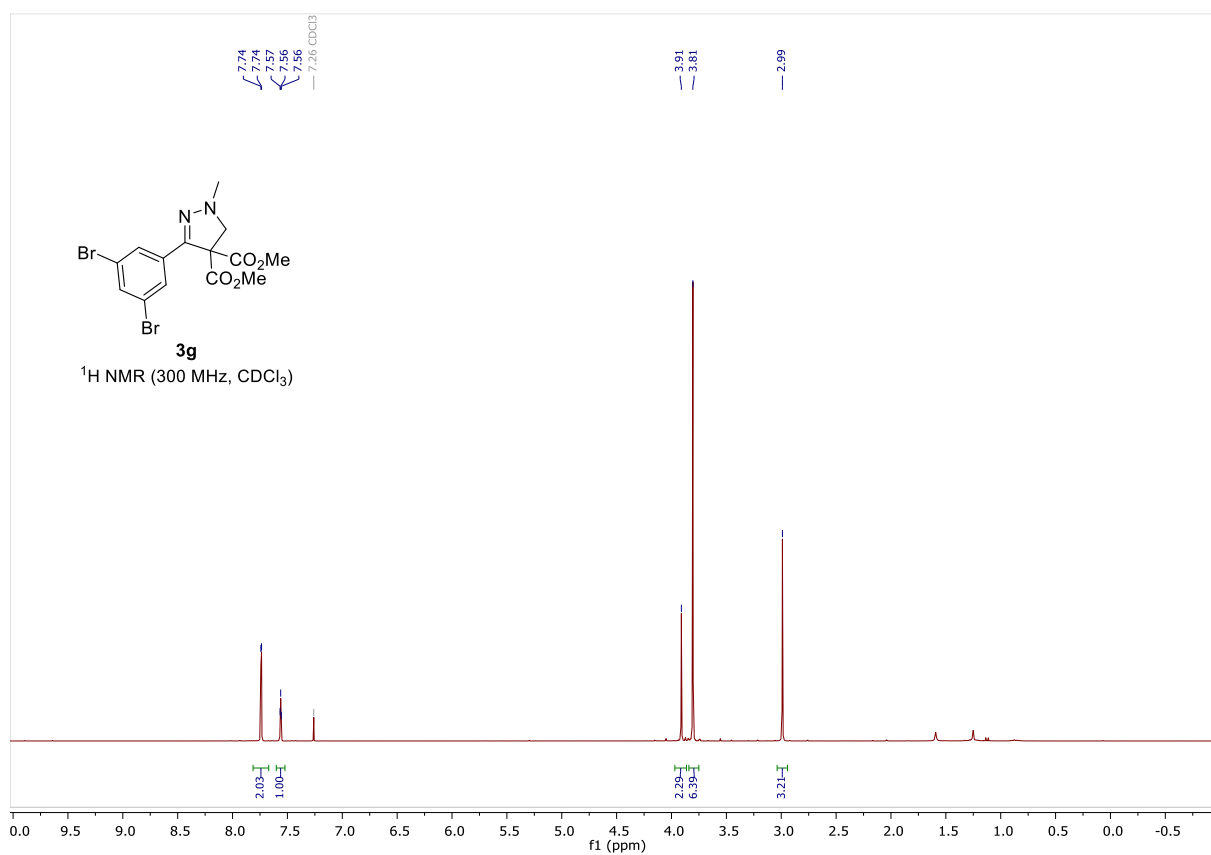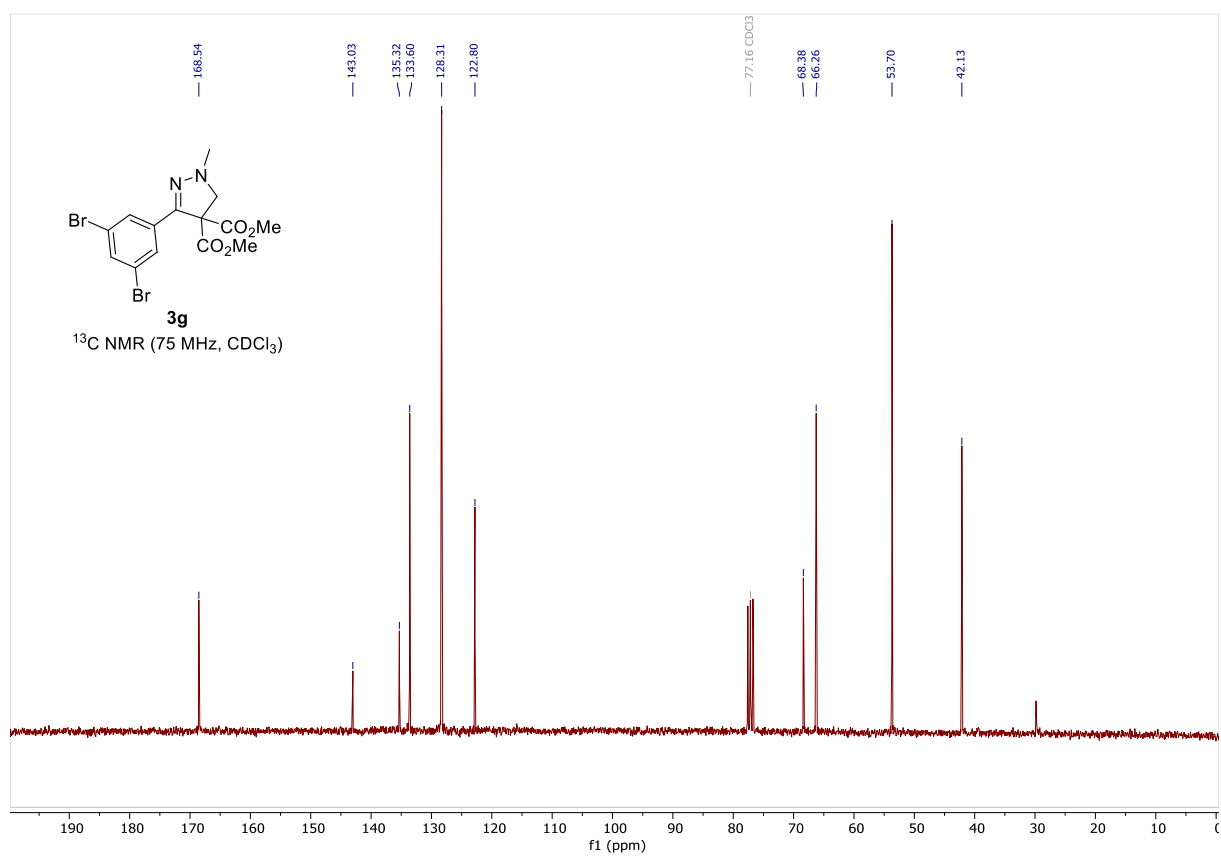

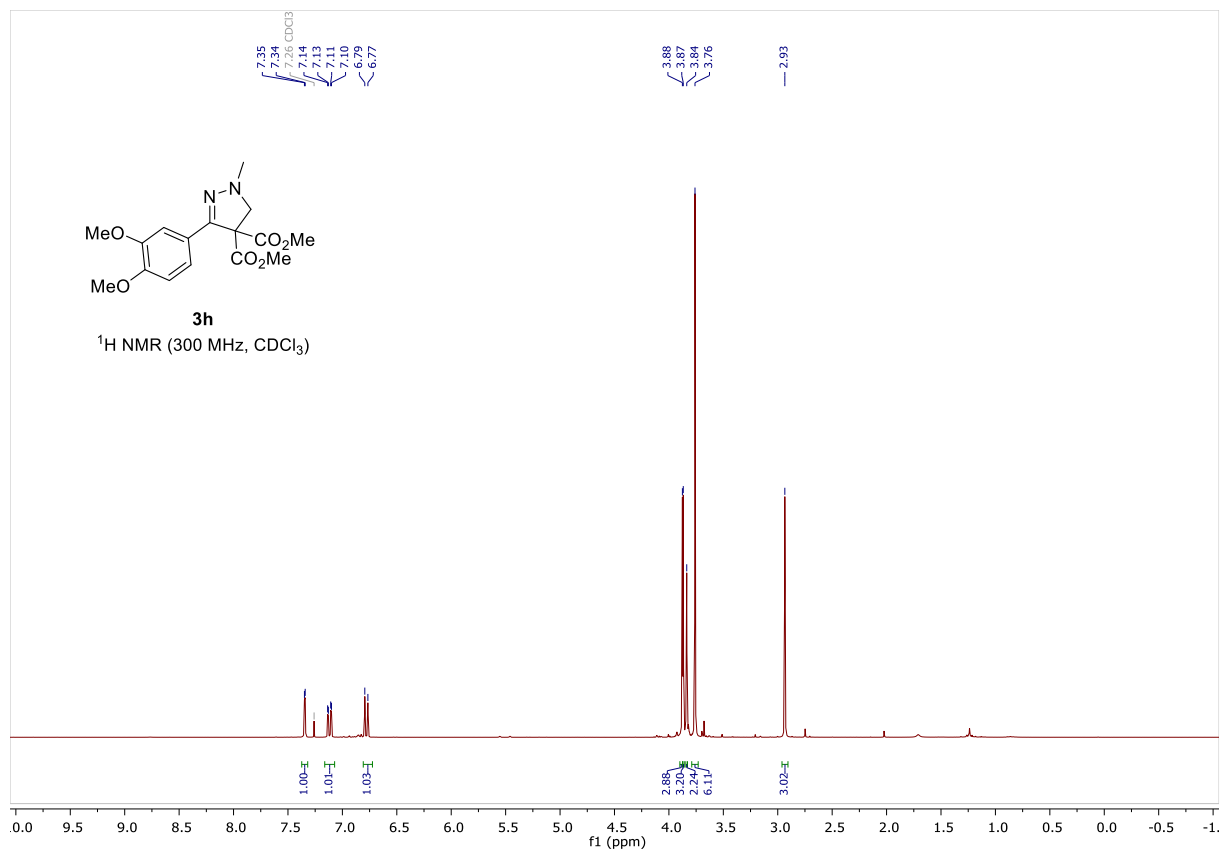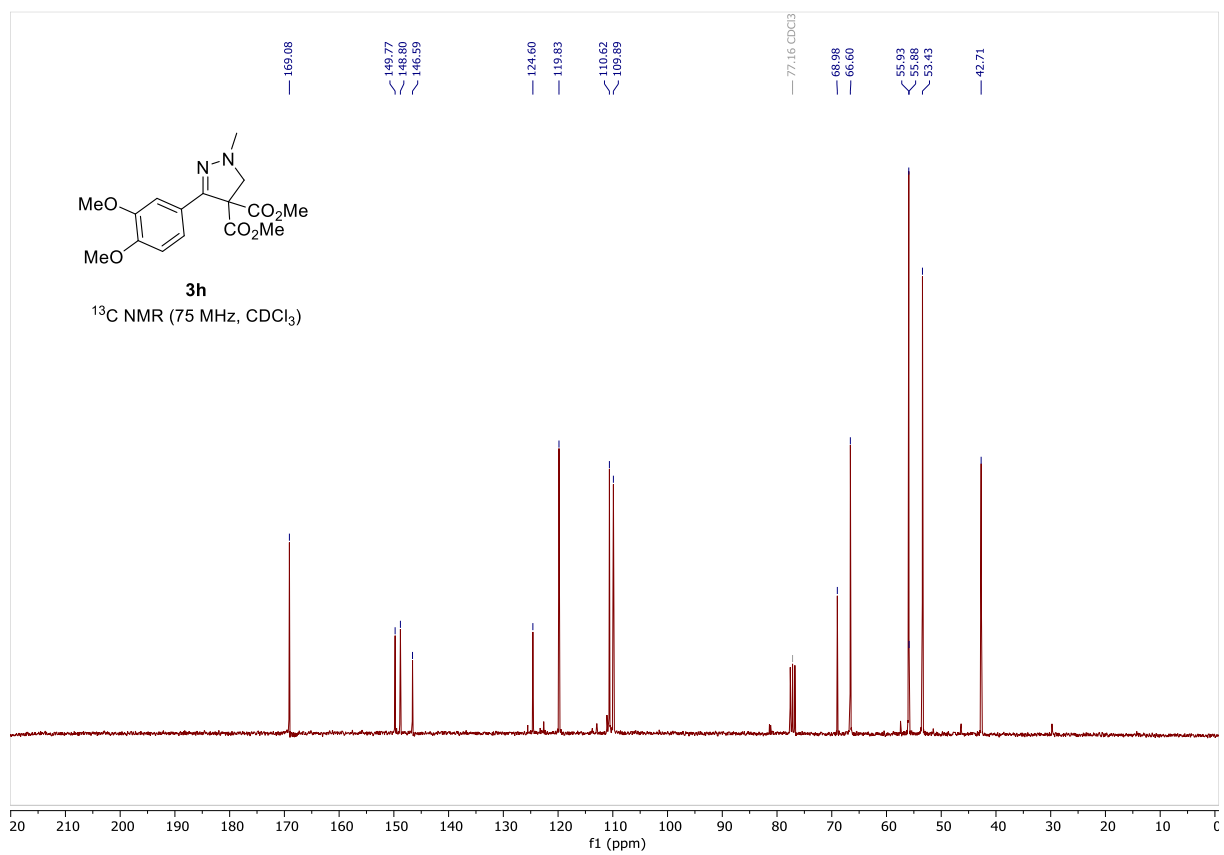

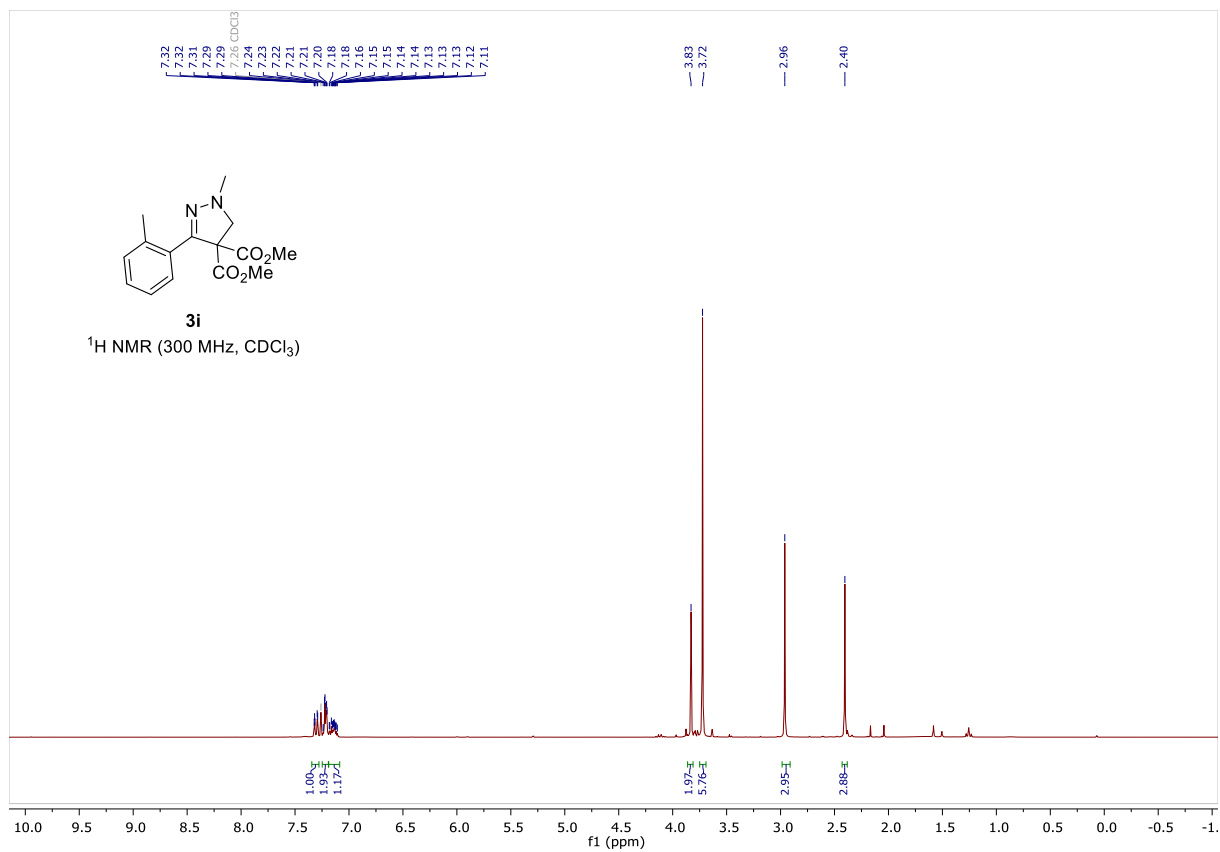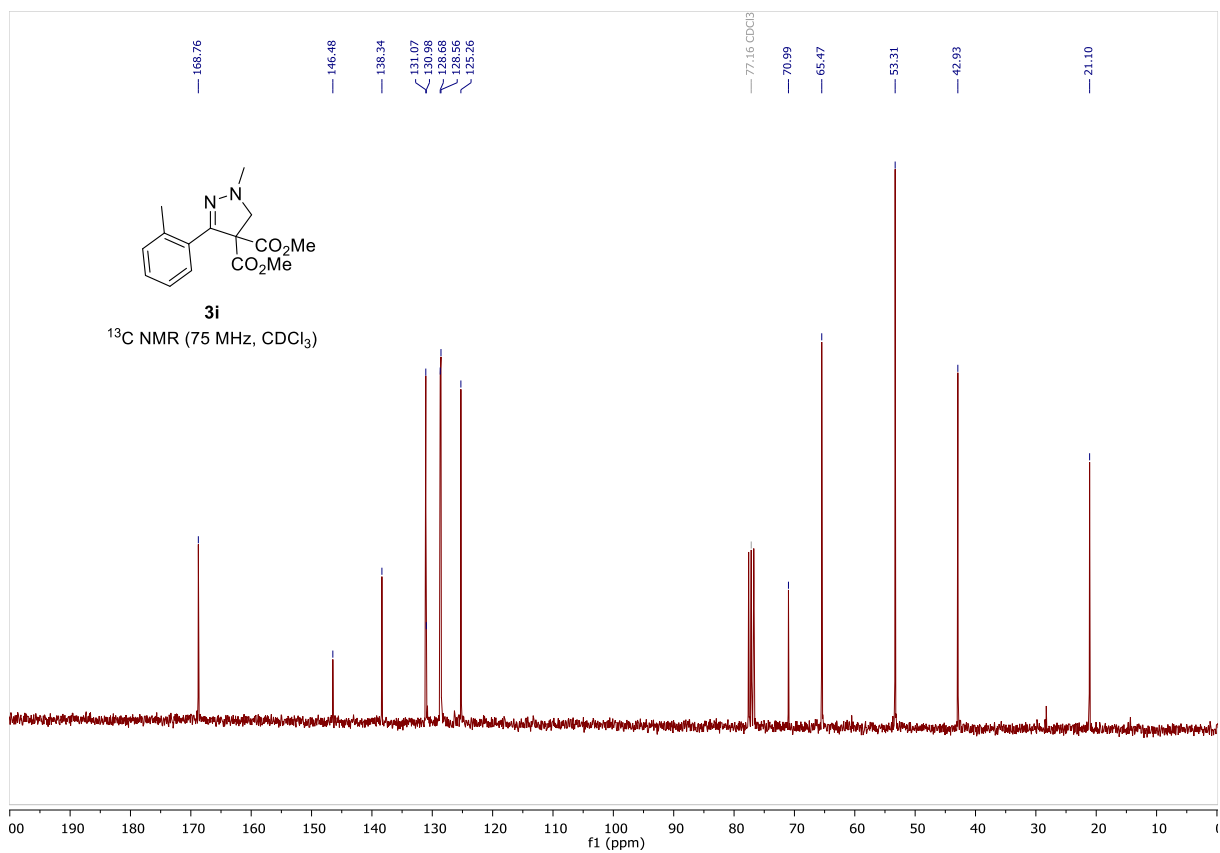

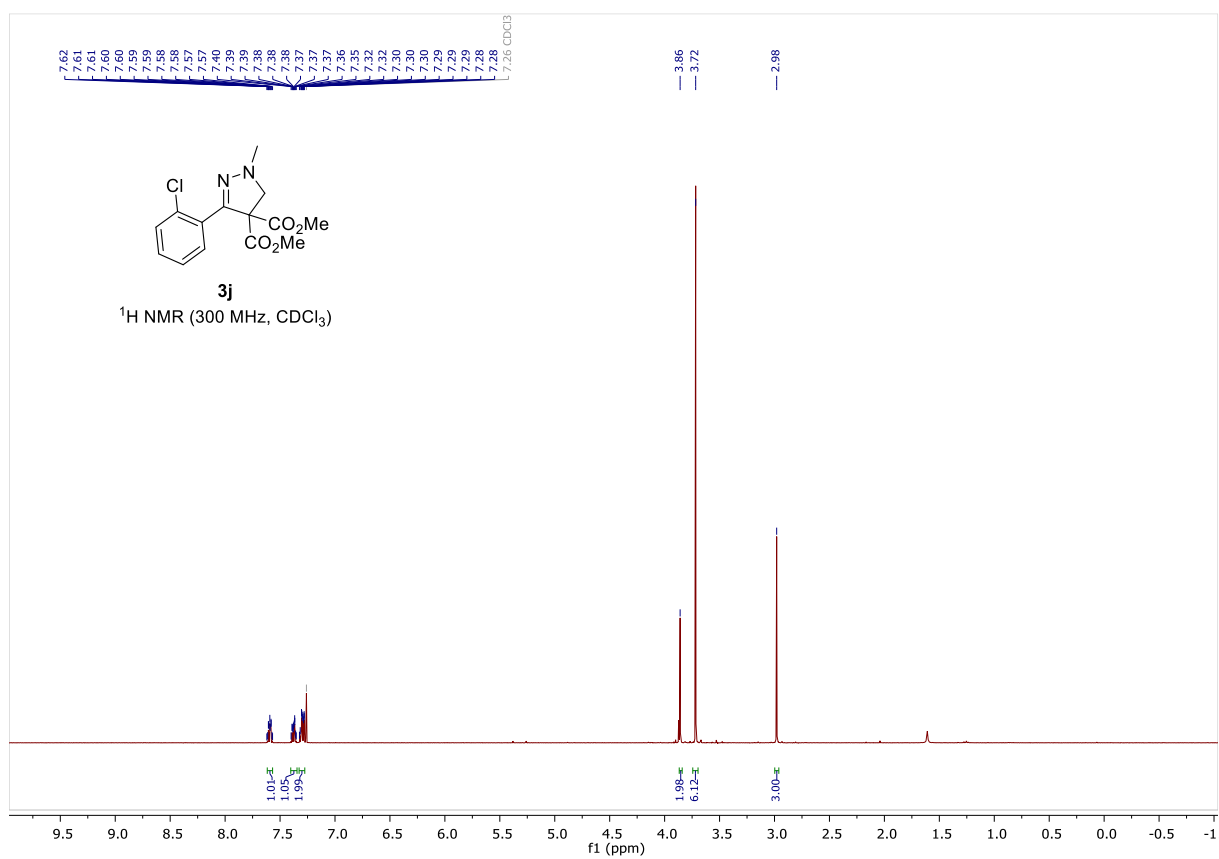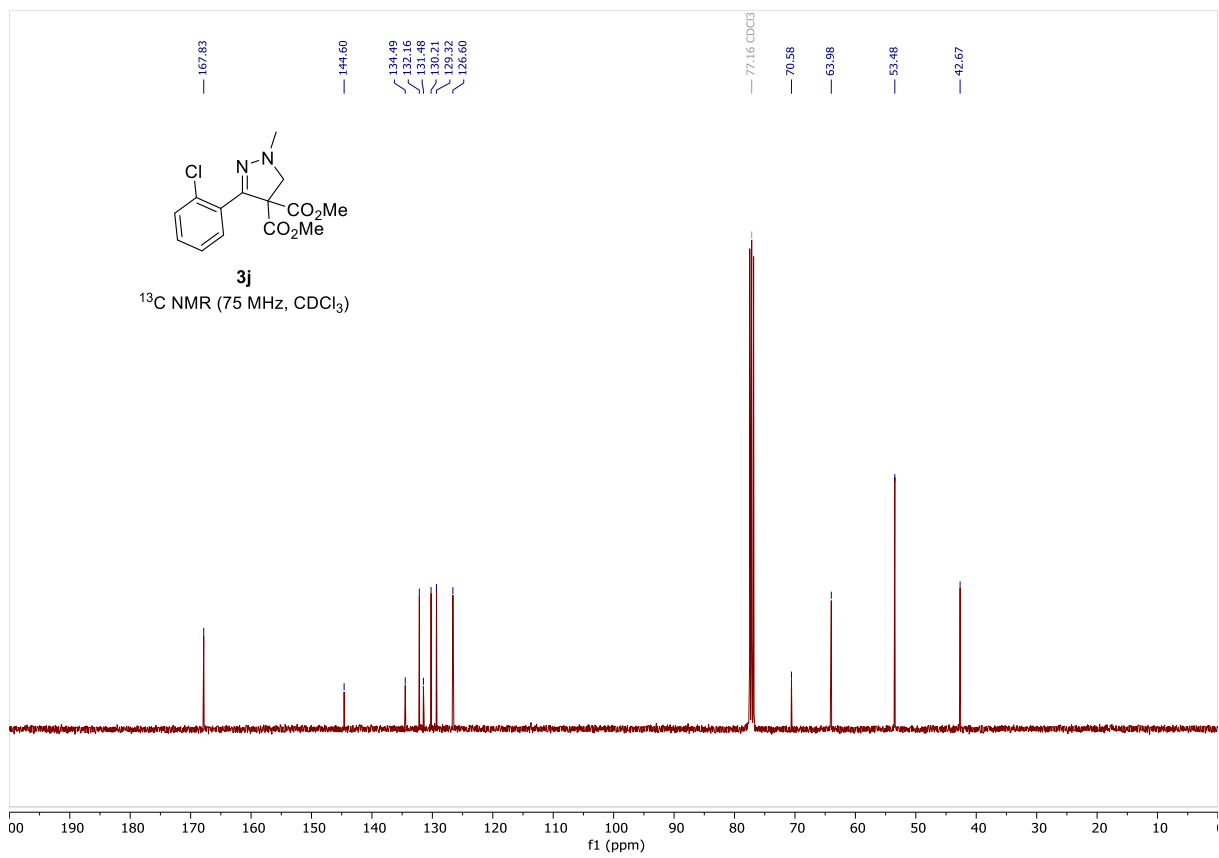

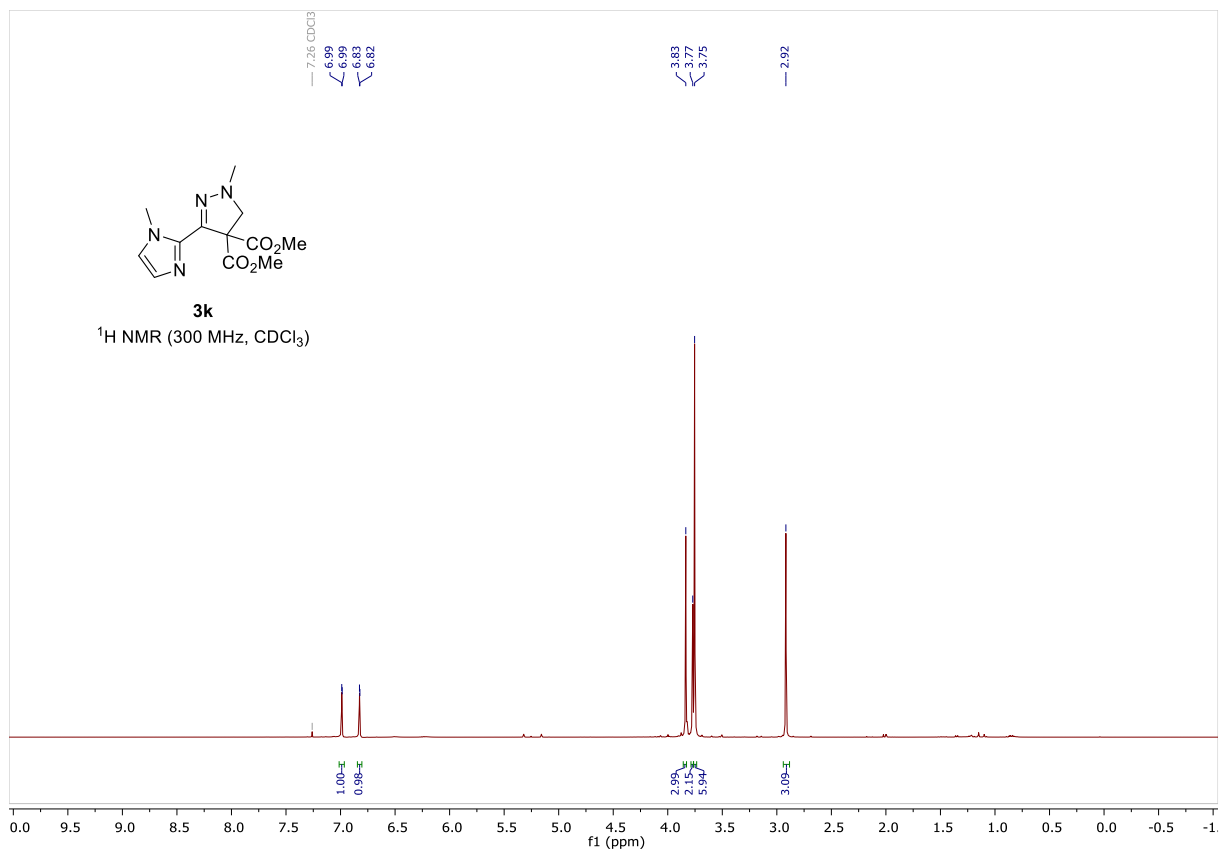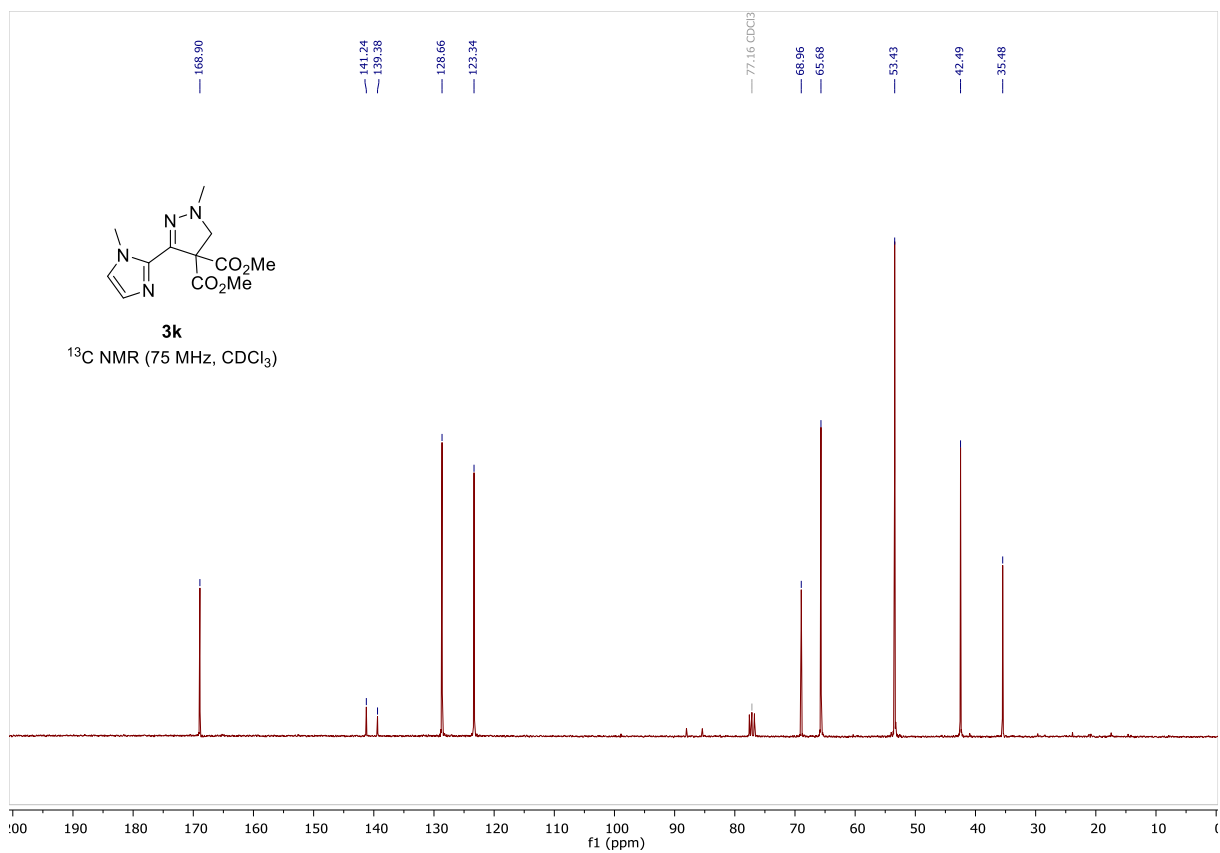



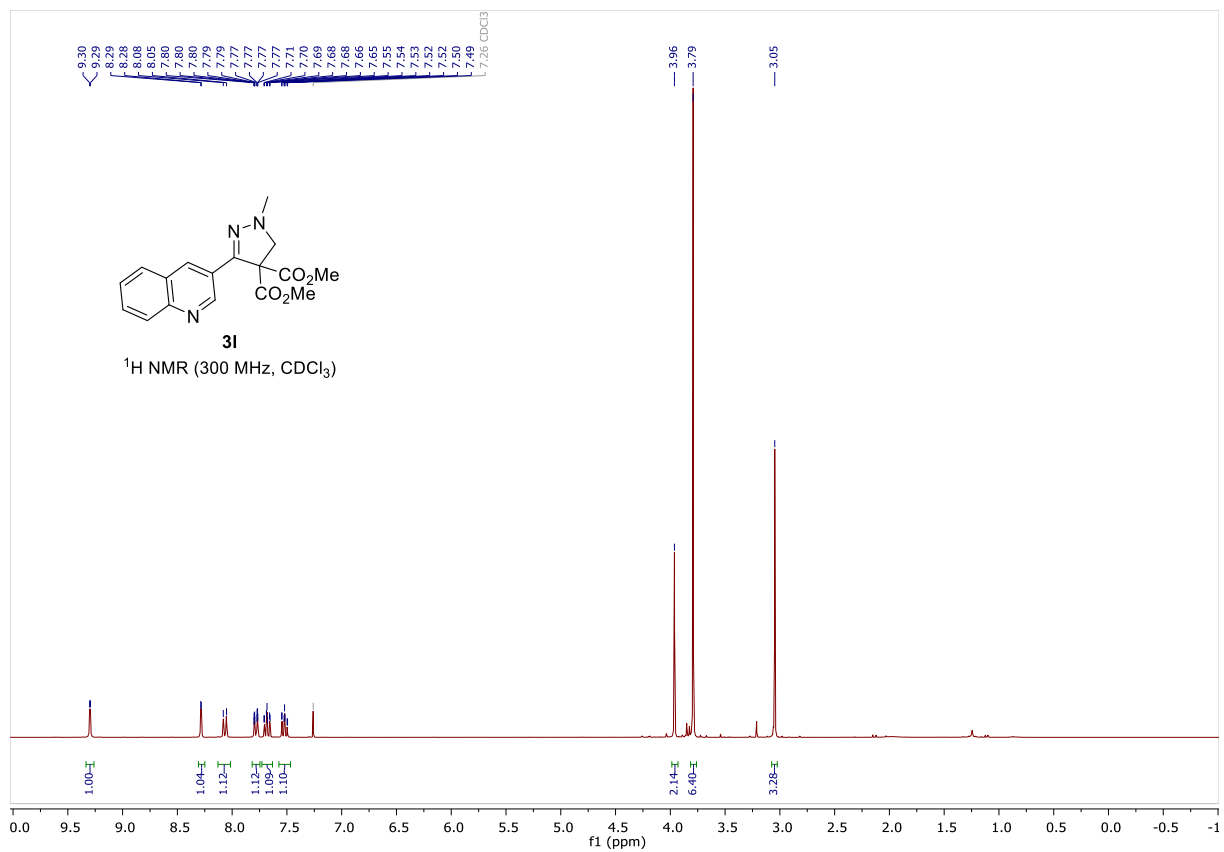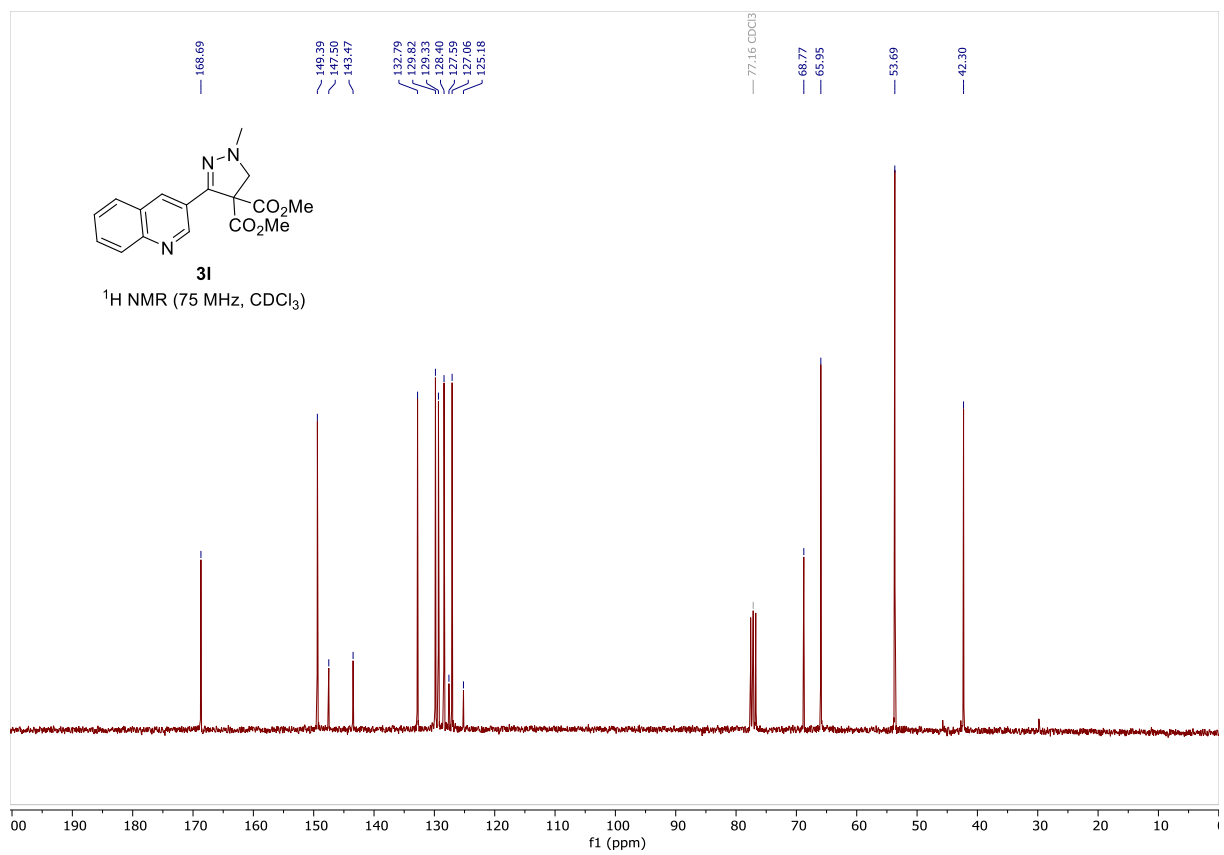

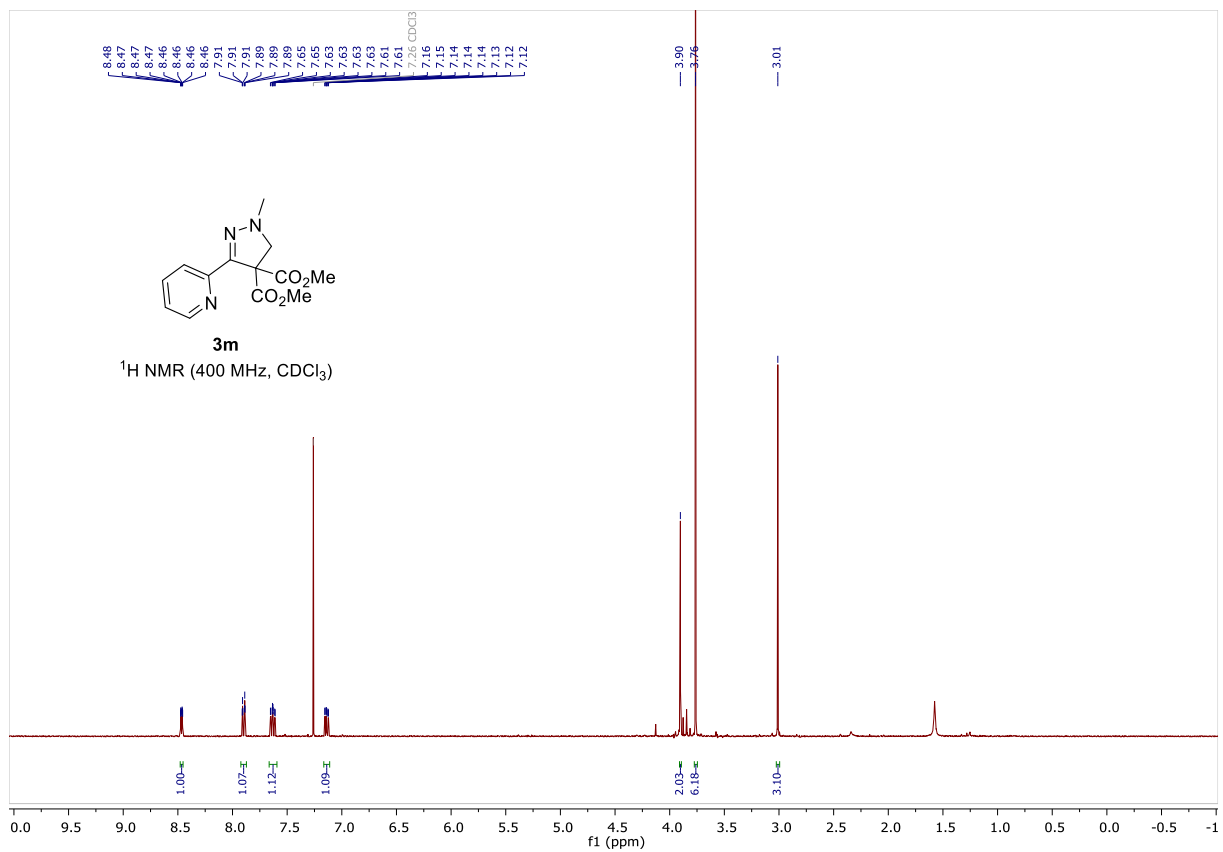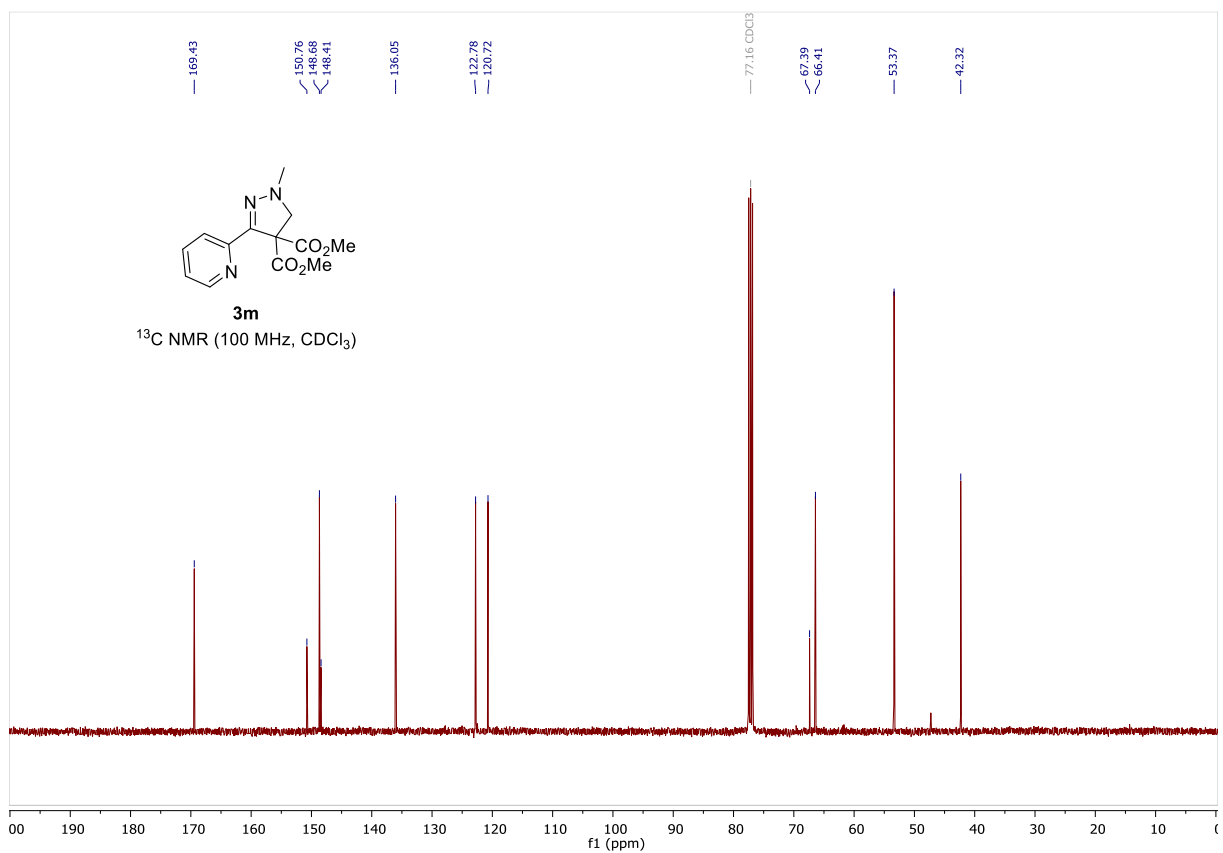



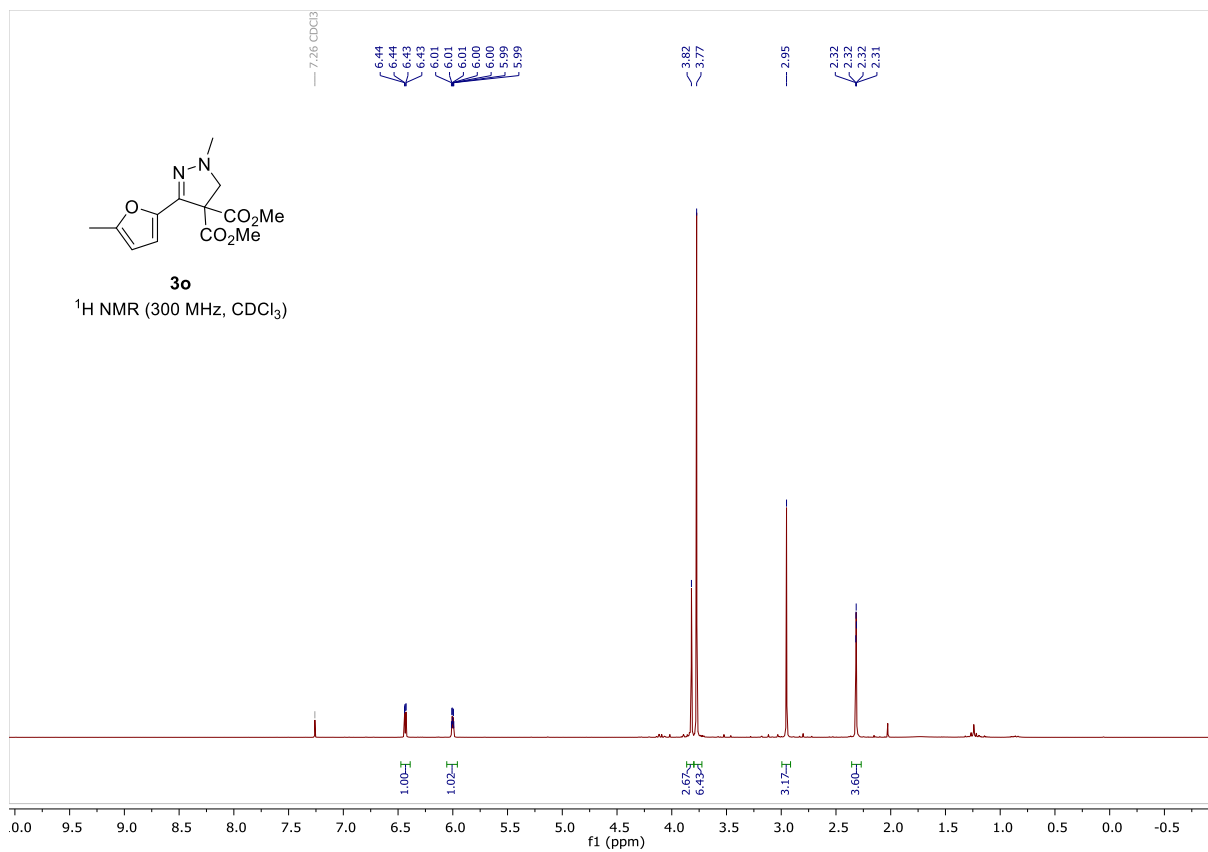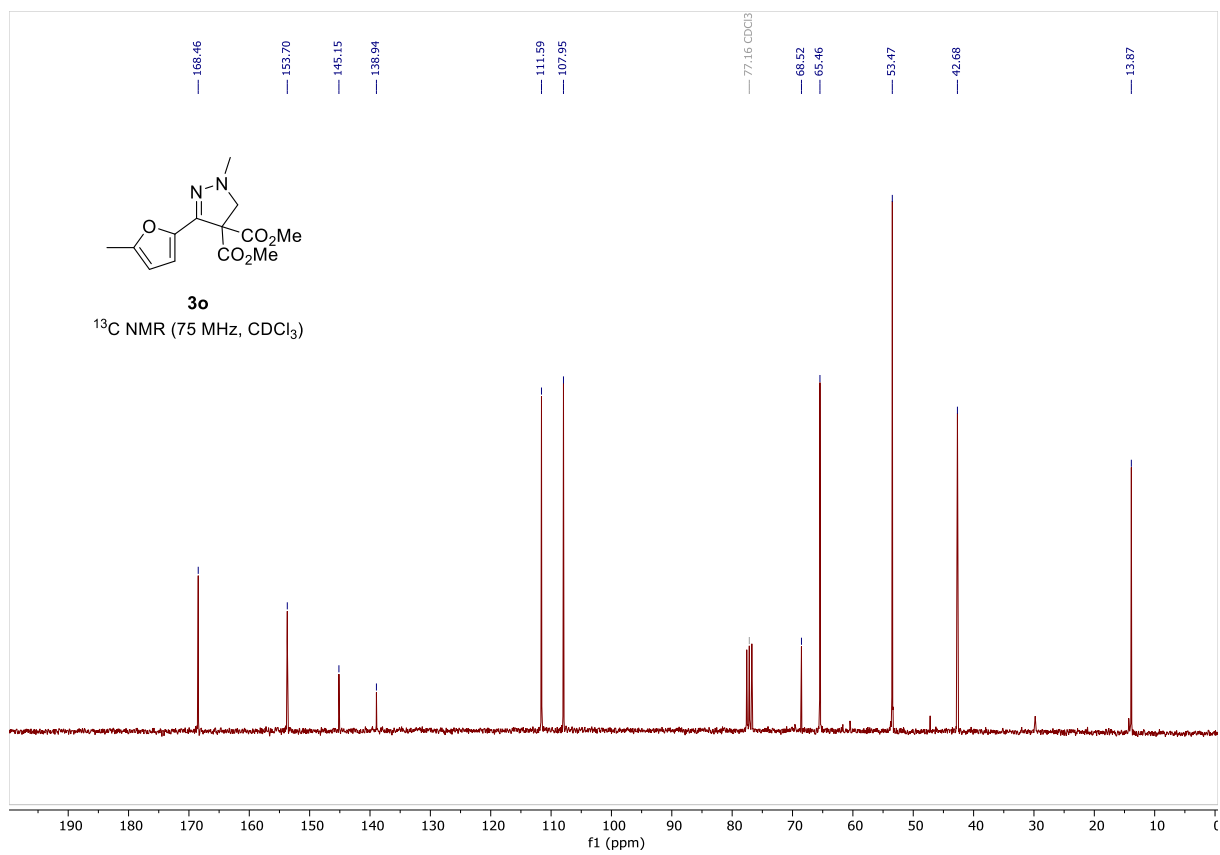

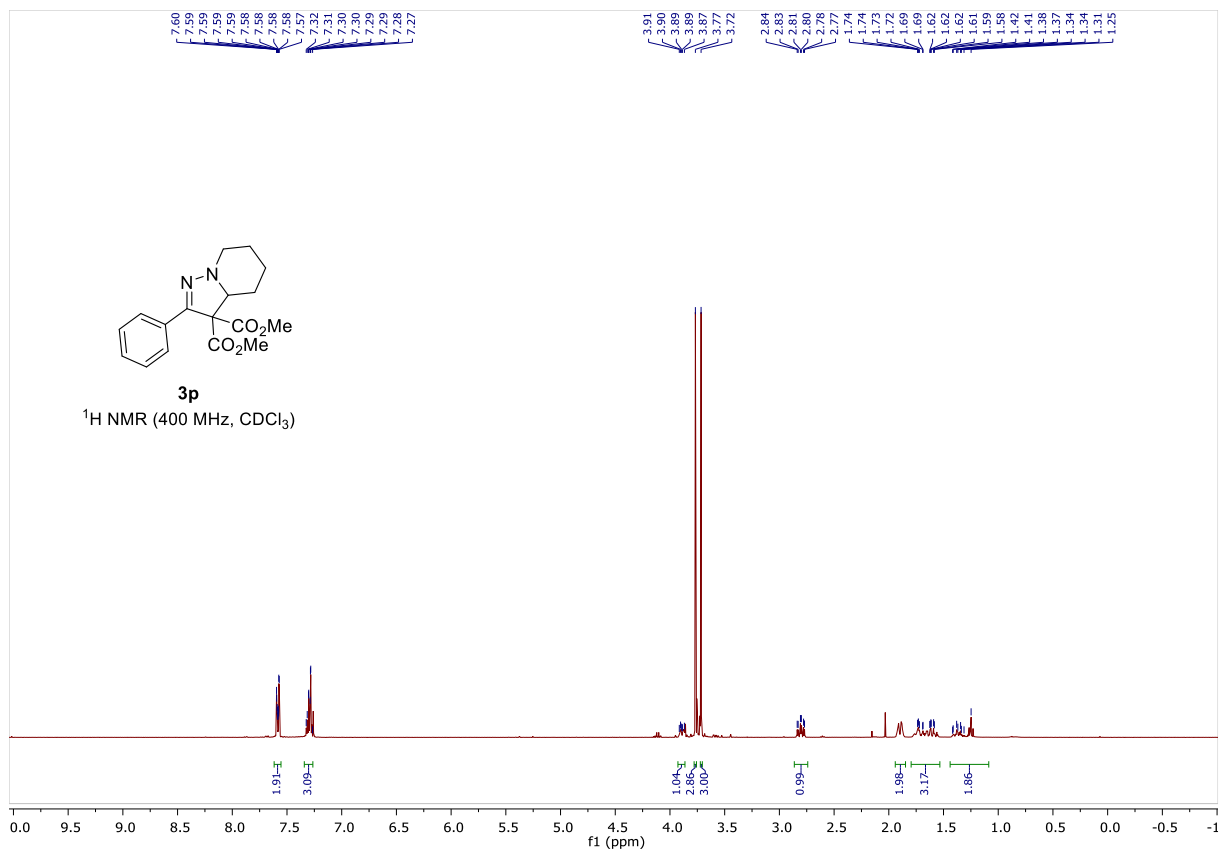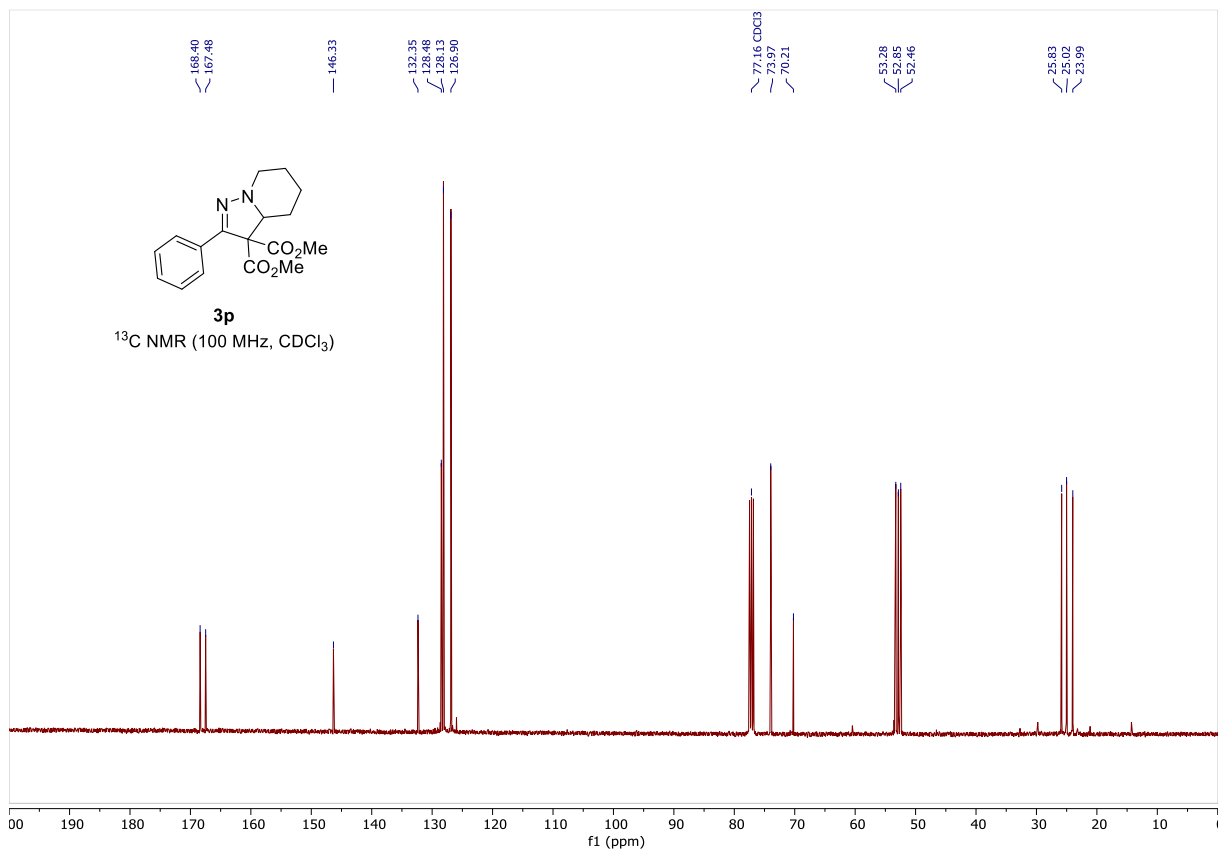

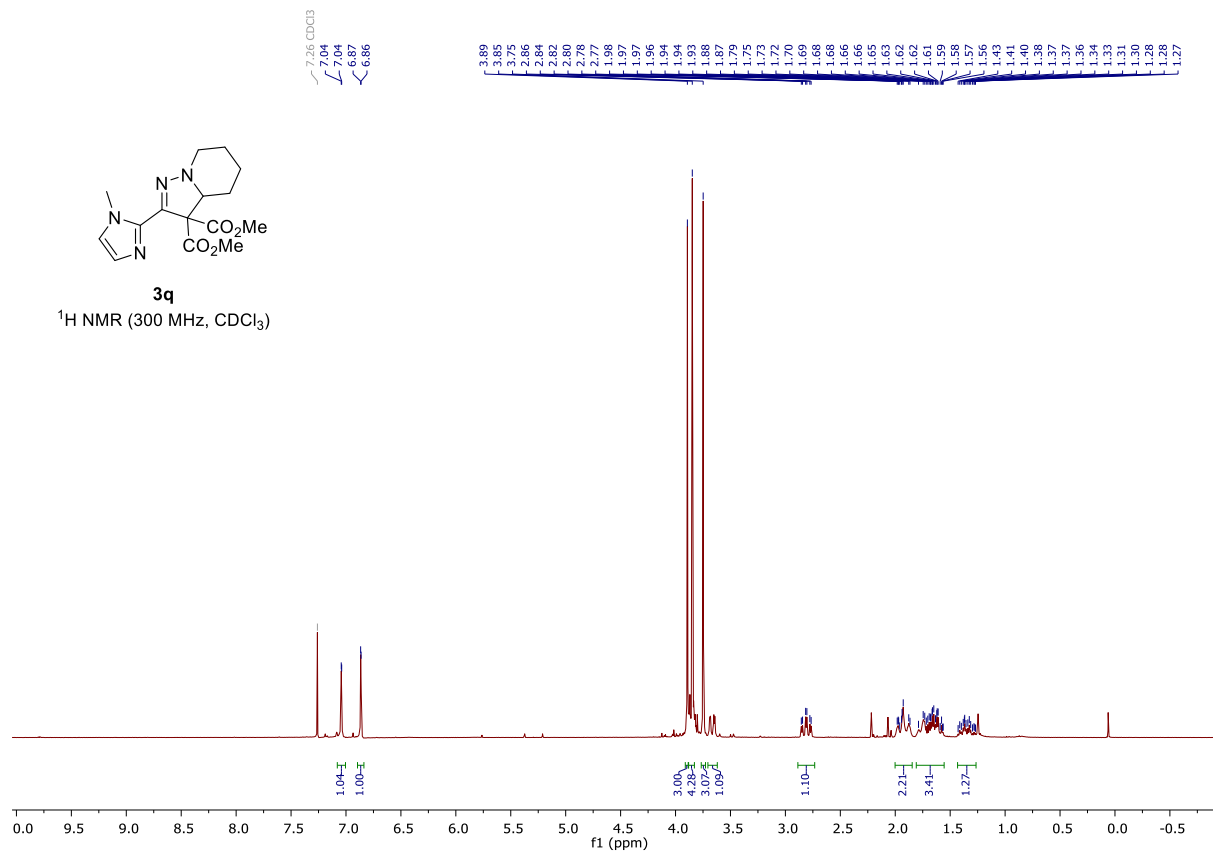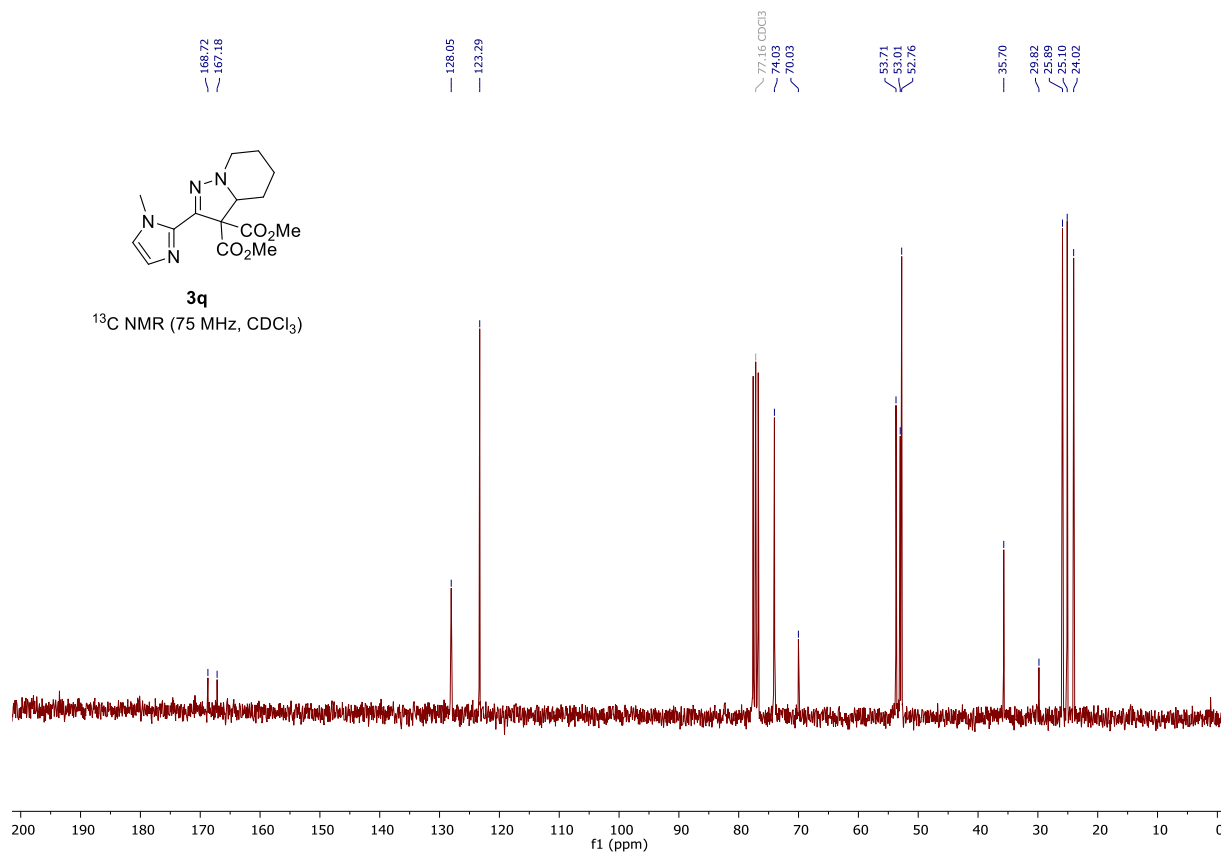

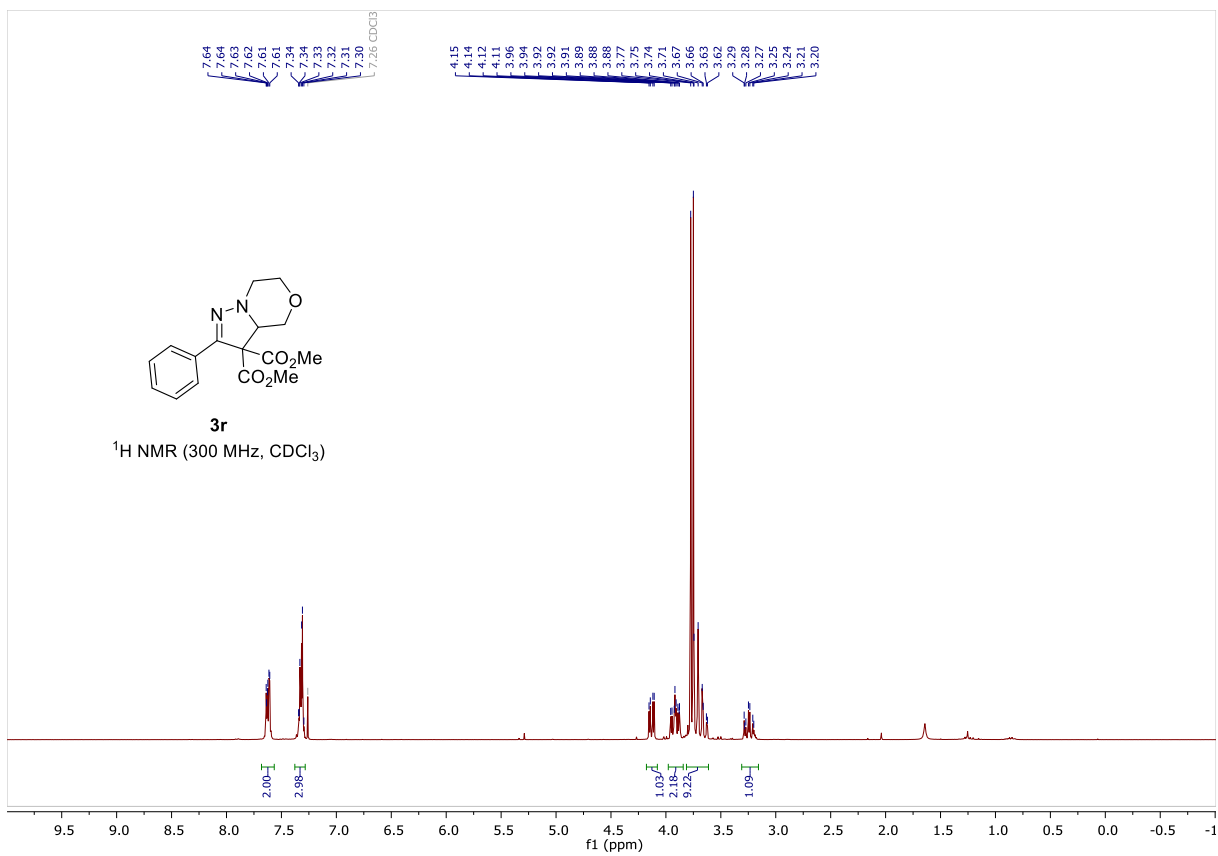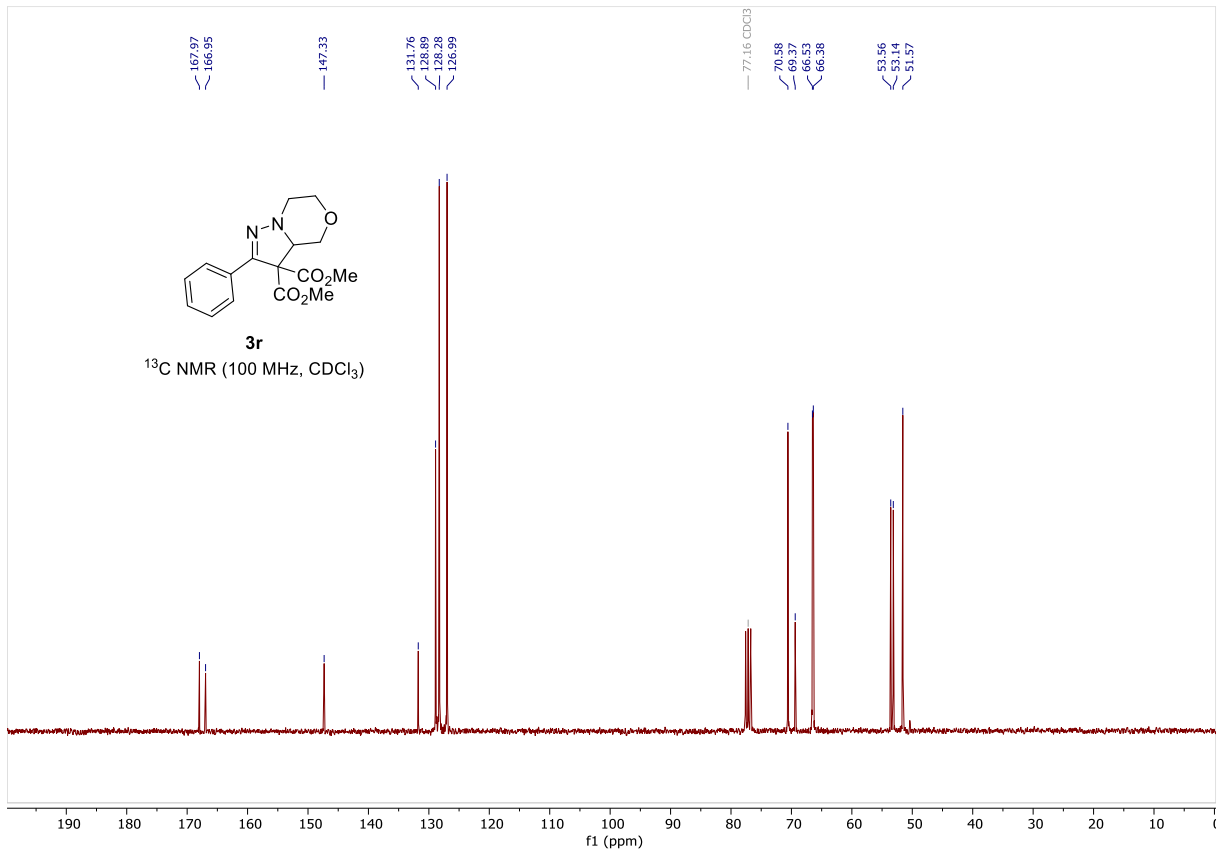

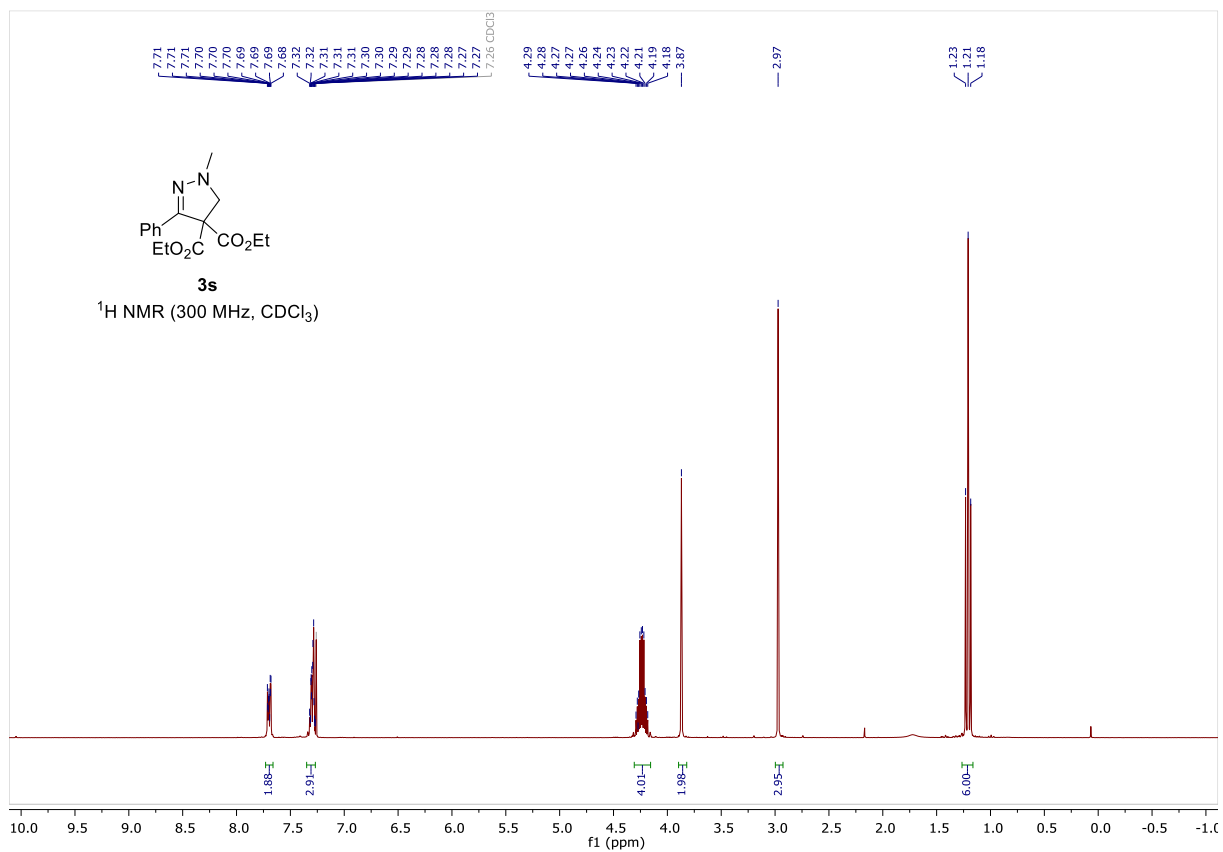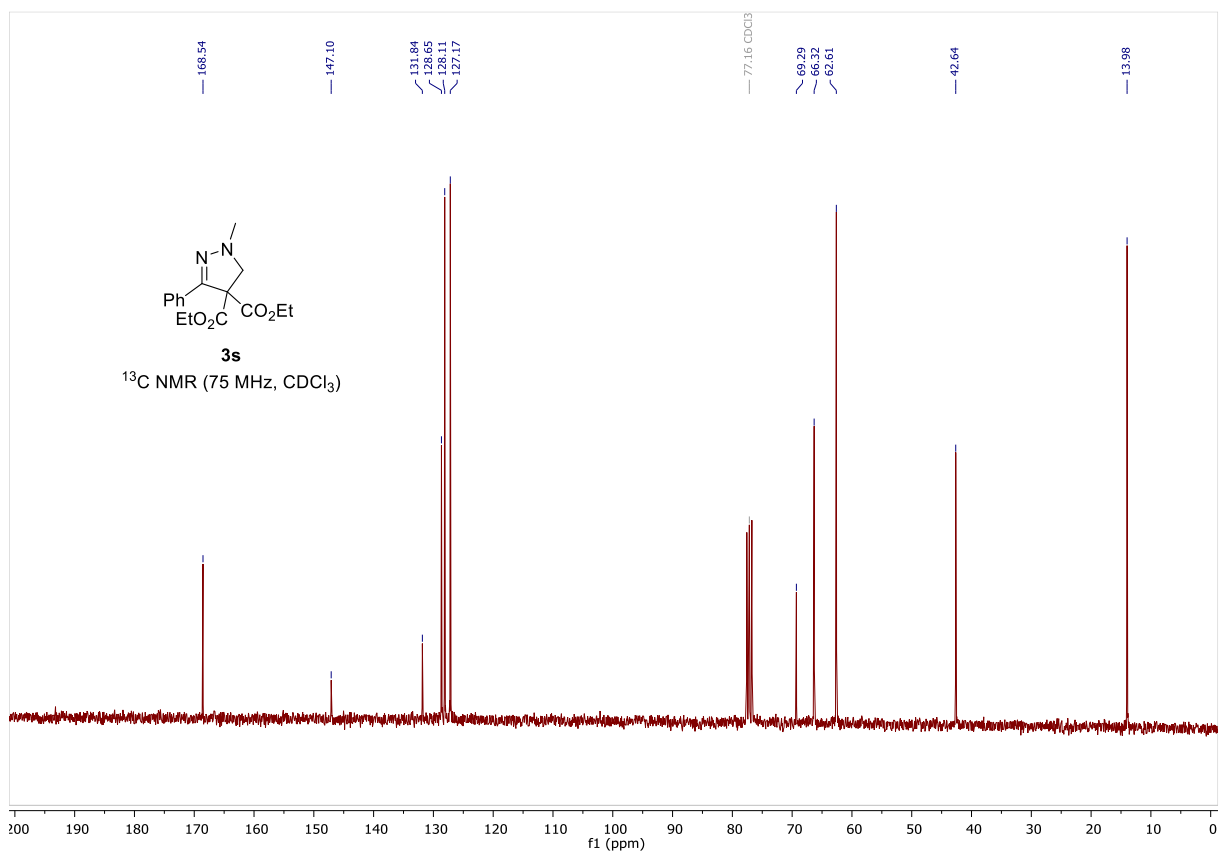



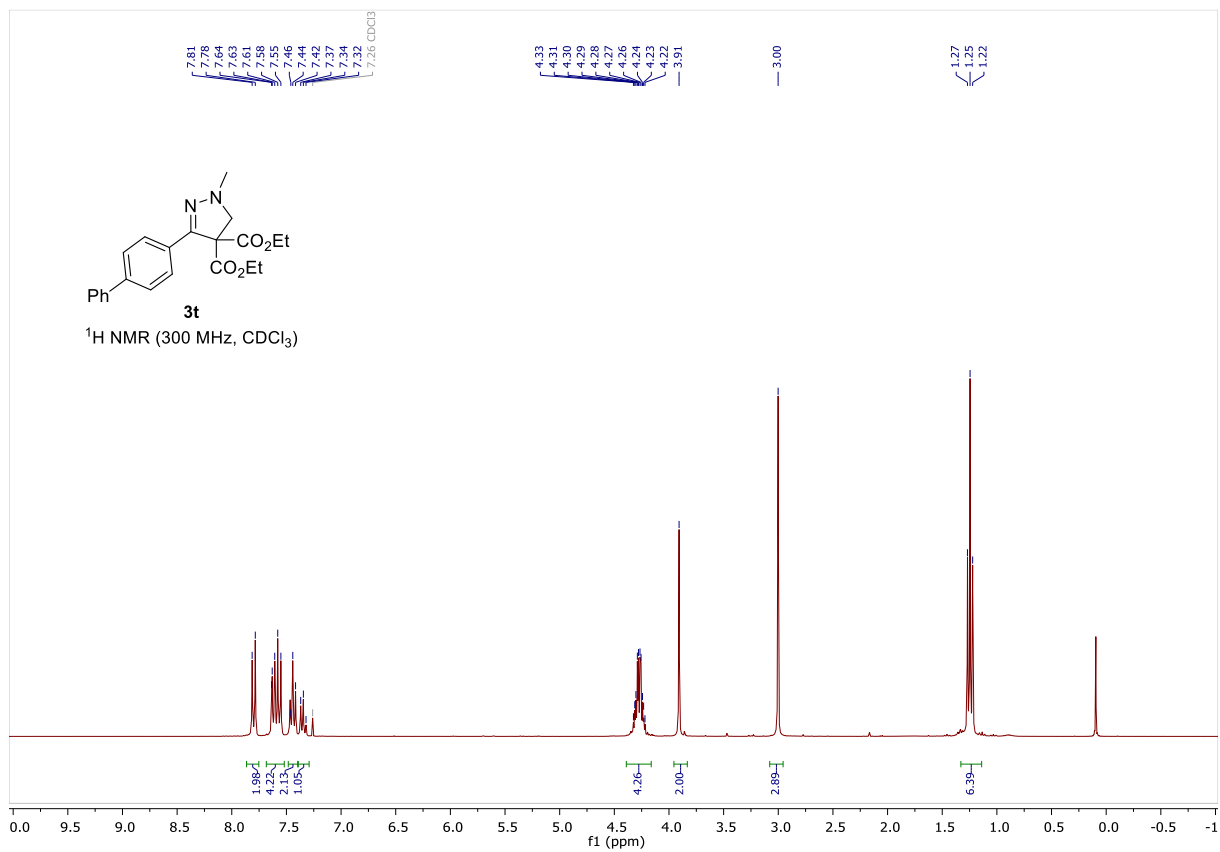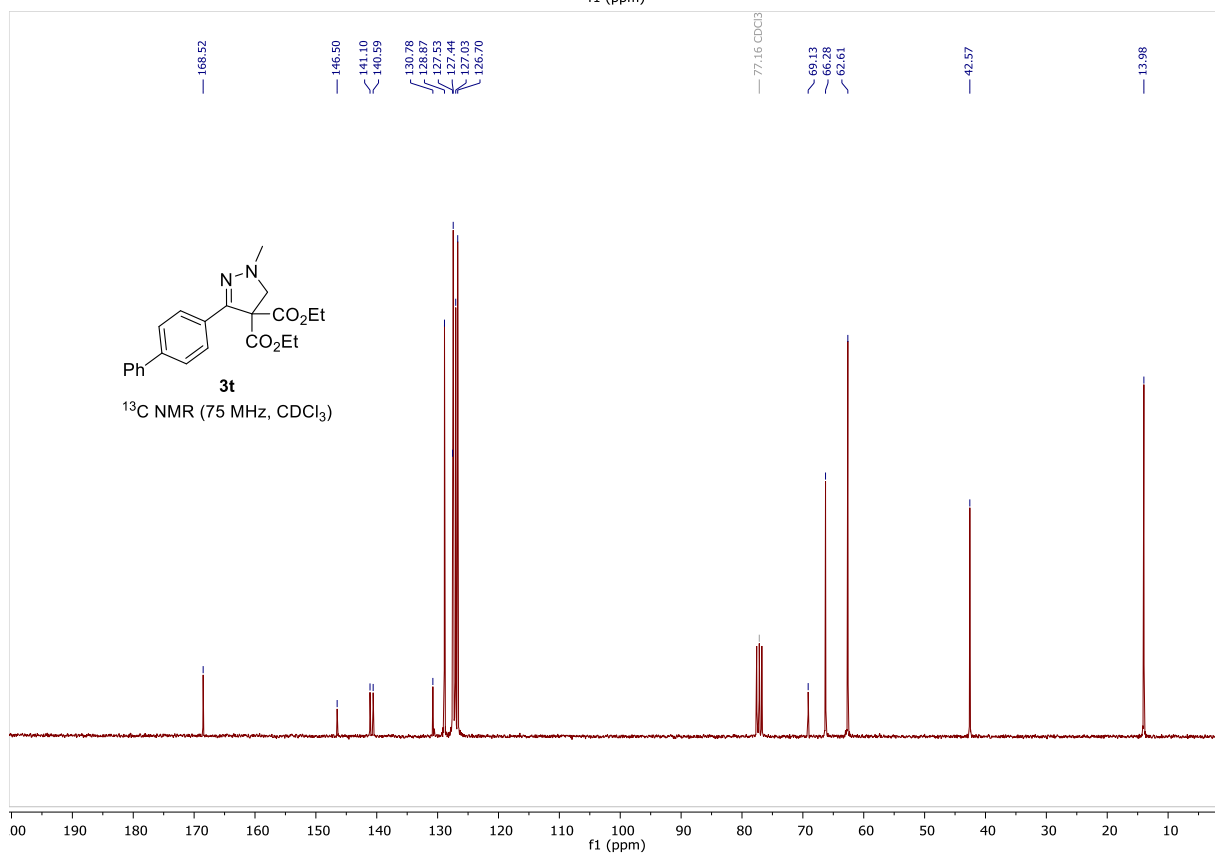

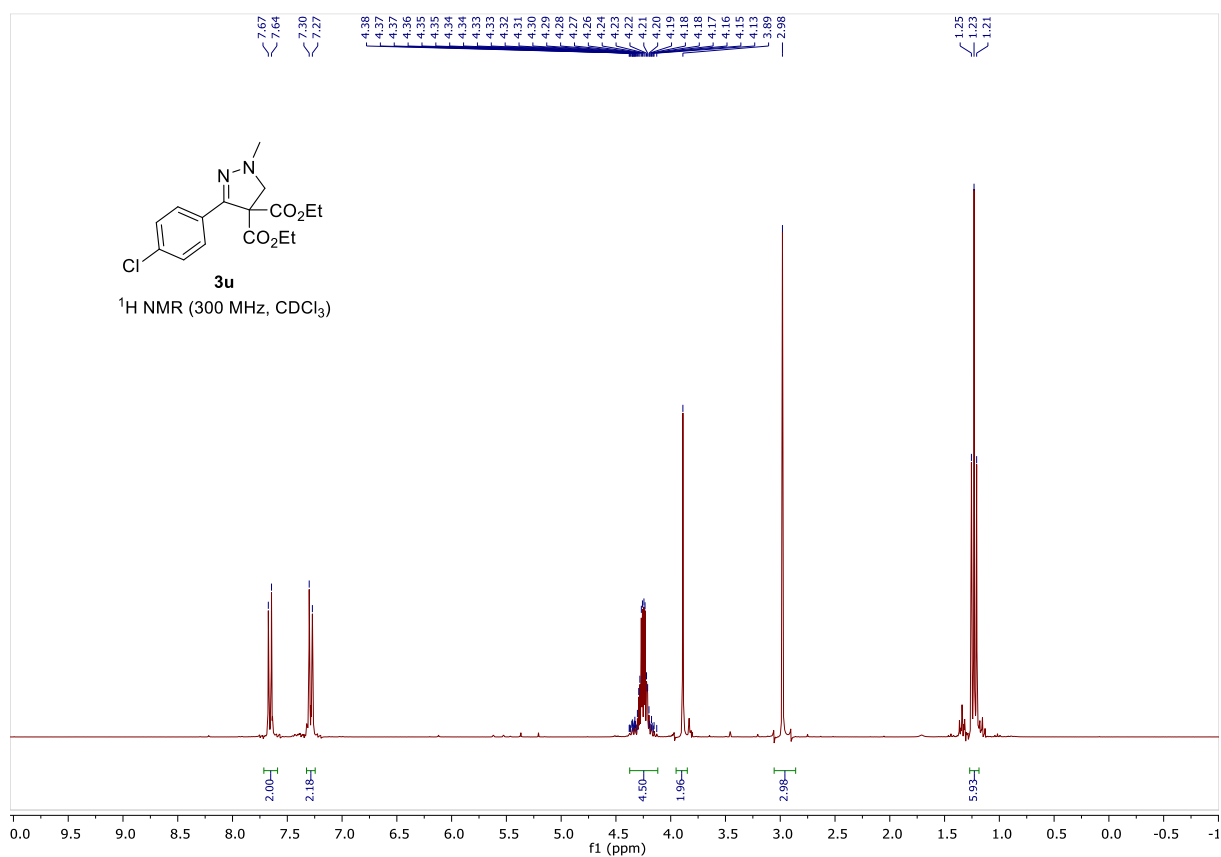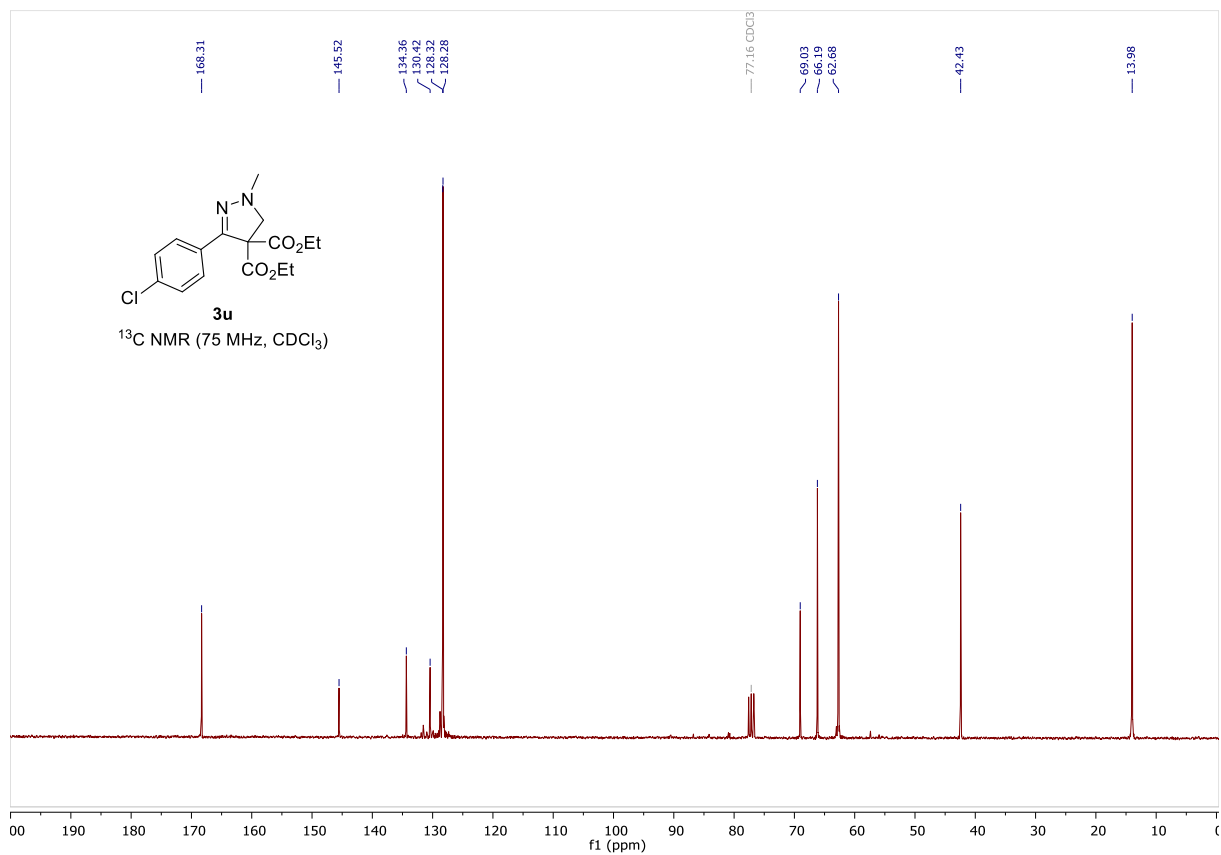

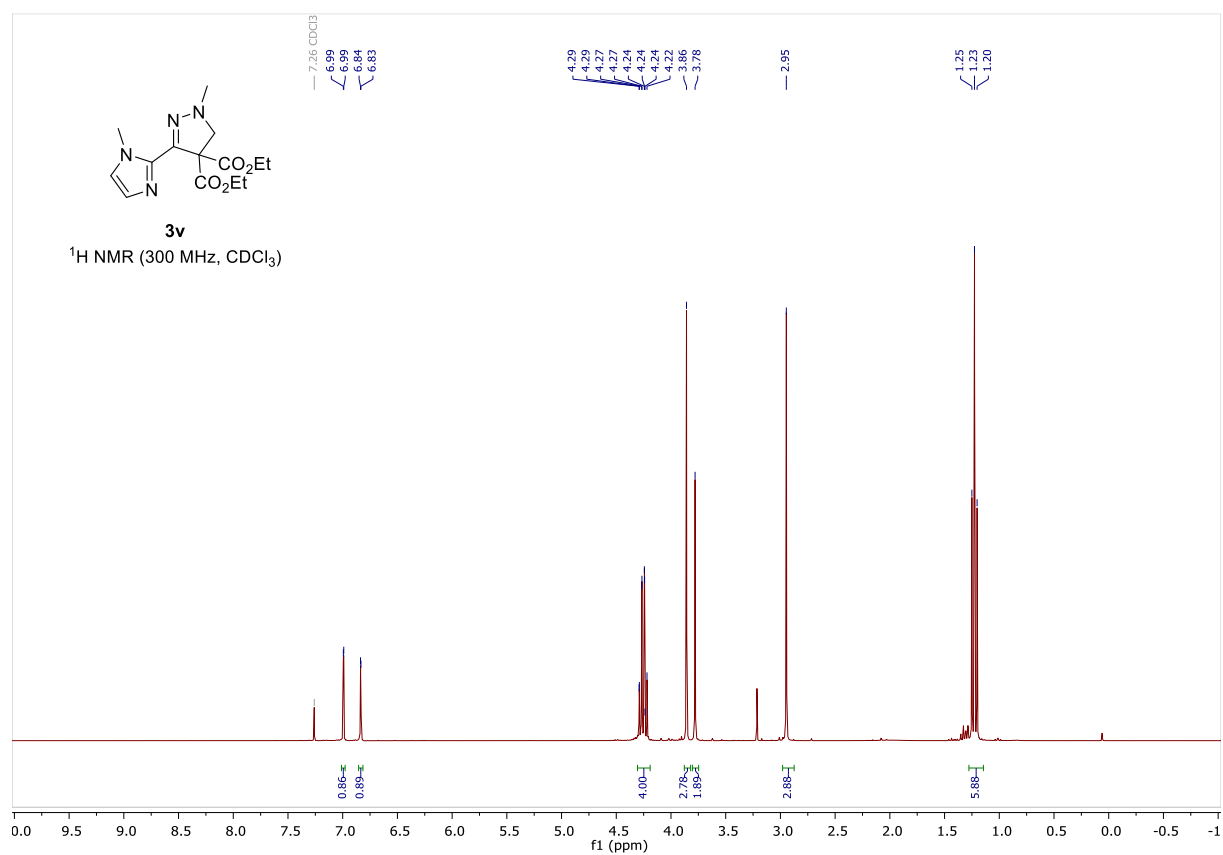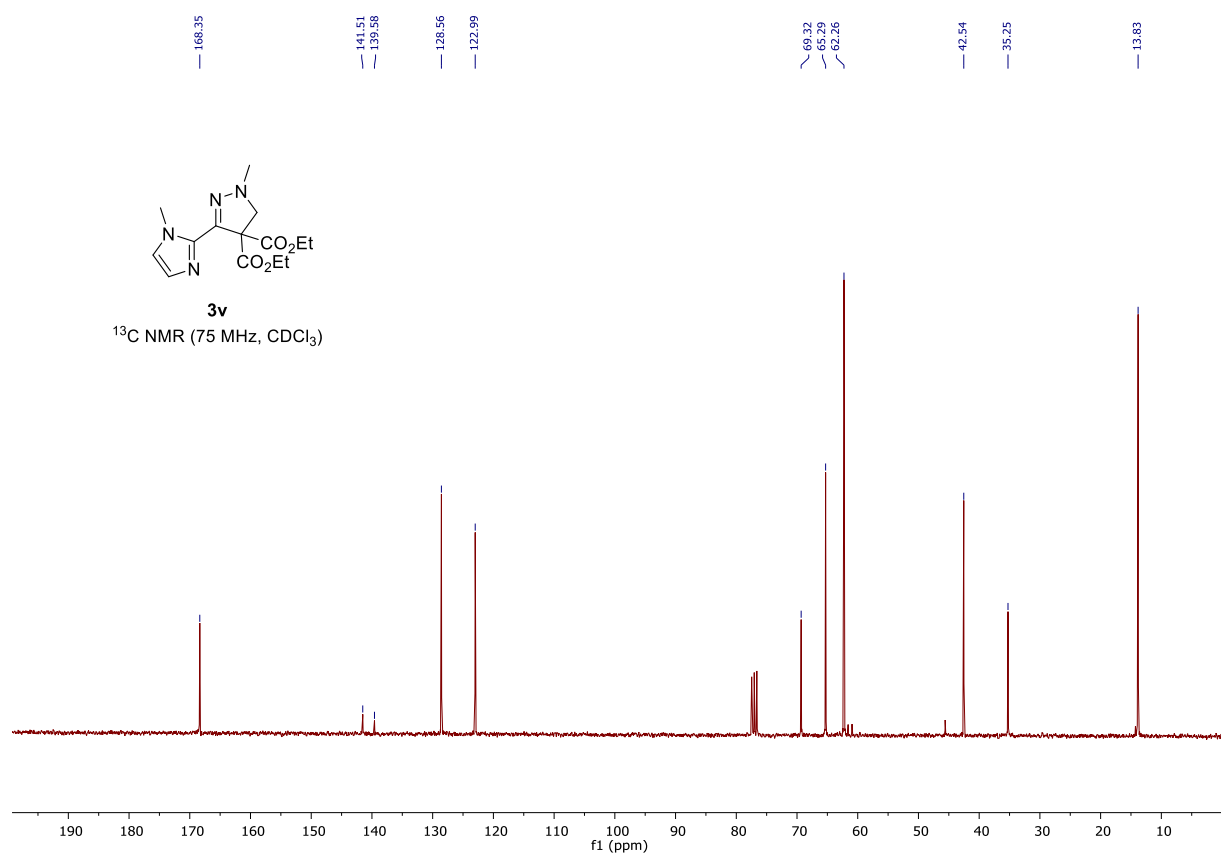

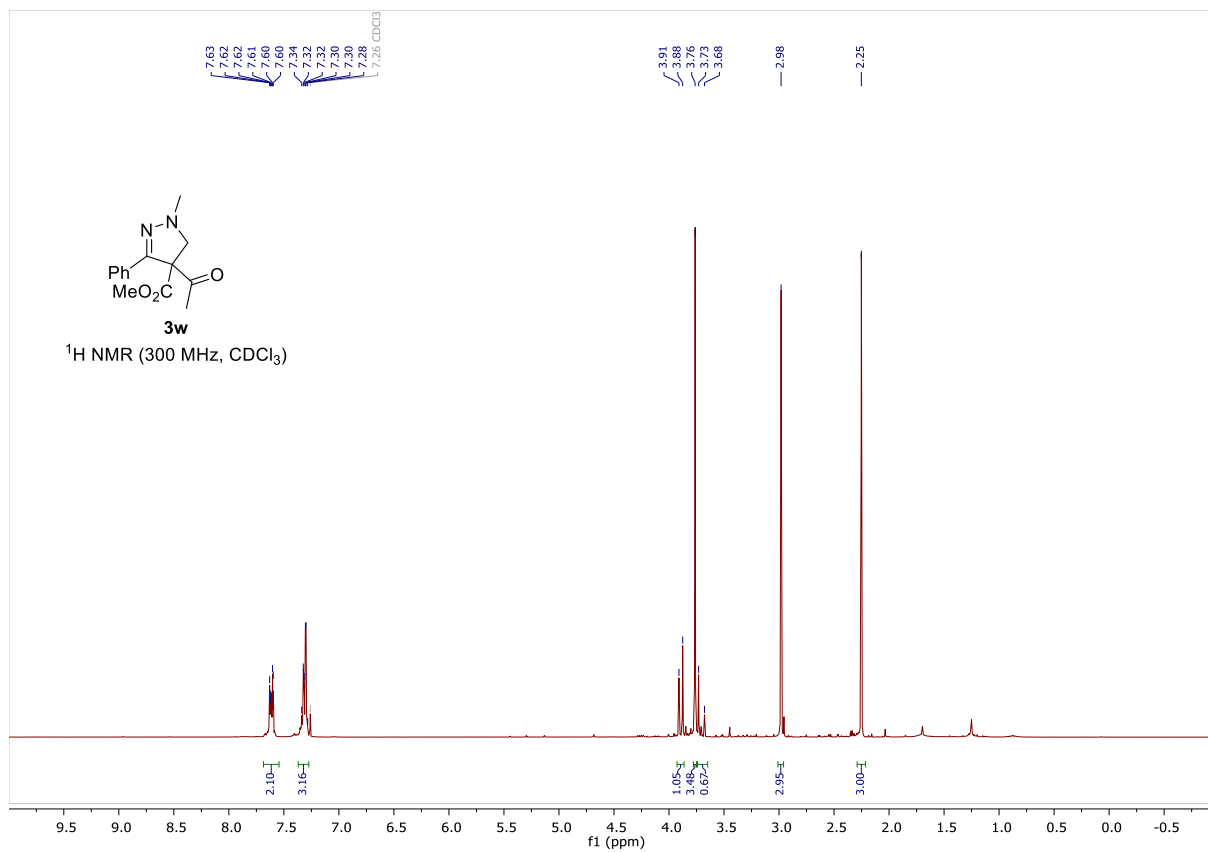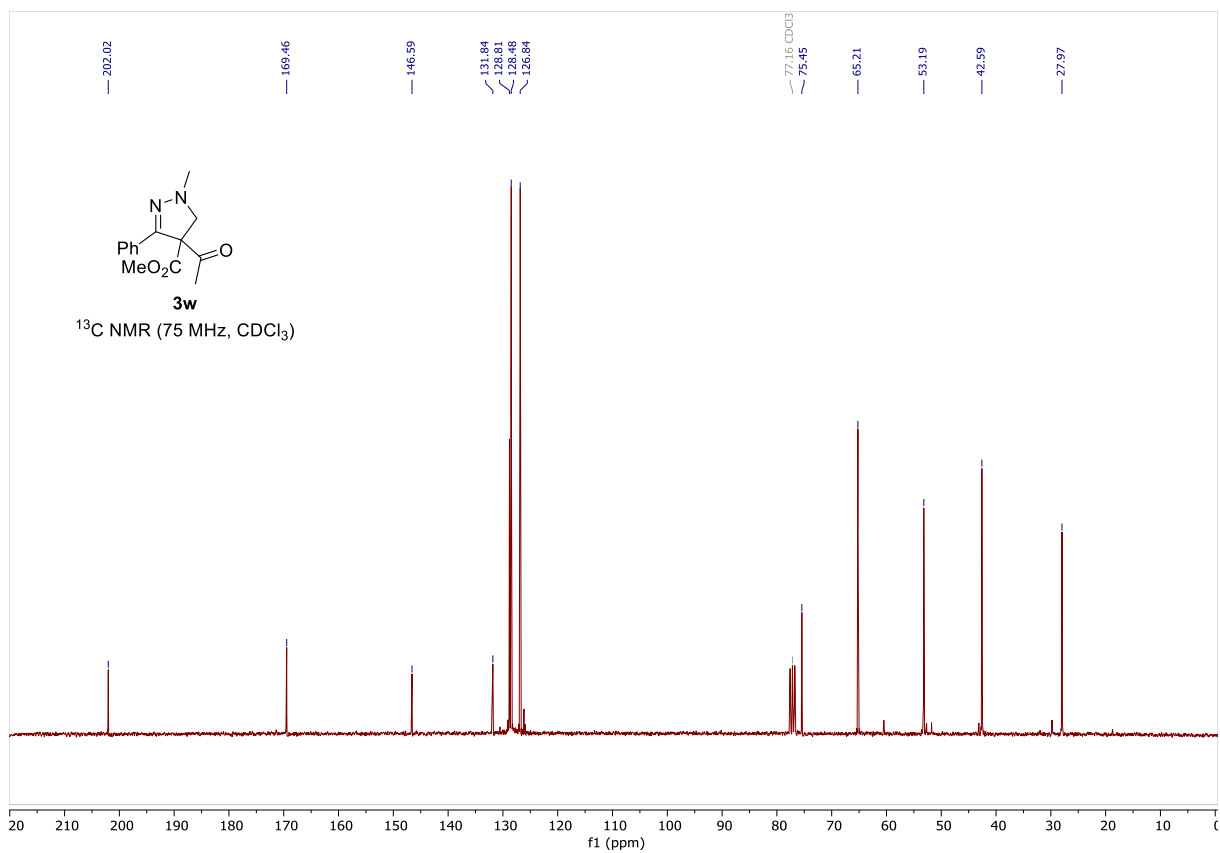

Supplement: d4ob00588k1.pdf [file d4ob00588k1.pdf]
